# Supplementary material for: PIM1 controls GBP1 activity to limit self-damage and to guard against pathogen infection
Source: PubMed Central journal article supplement (PMC7615196; doi:10.1126/science.adg2253), 2023-10-06

**Fig. 1C**

Figure as in manuscript:

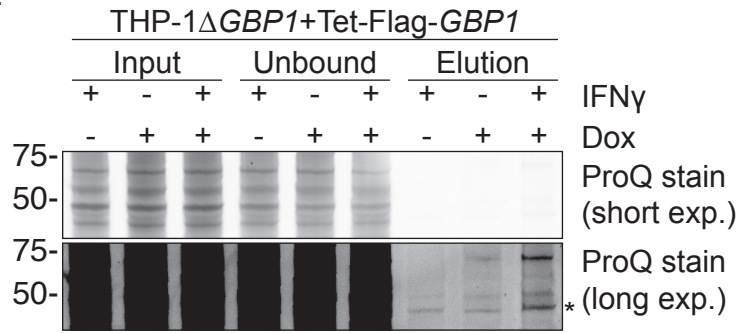

Uncropped gels with indicated size marker and crop area (lane annotation, if excluded from figure):

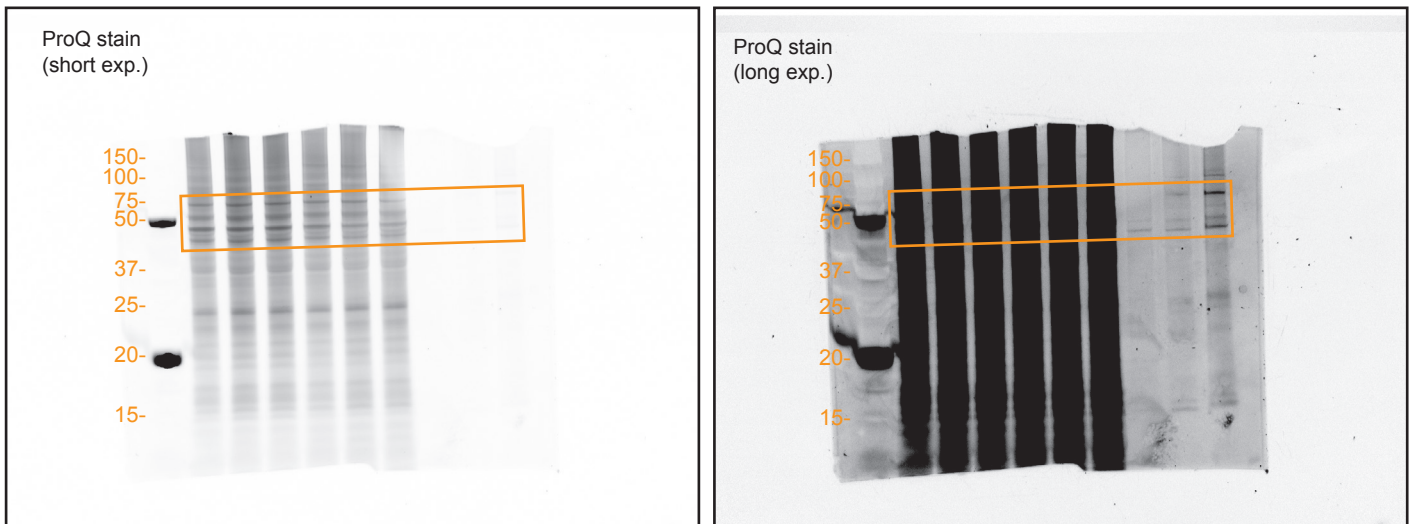

SDS-PAGE gel stained with ProQ diamond gel stain for phospho-protein detection

**Fig. 1D**

Figure as in manuscript:

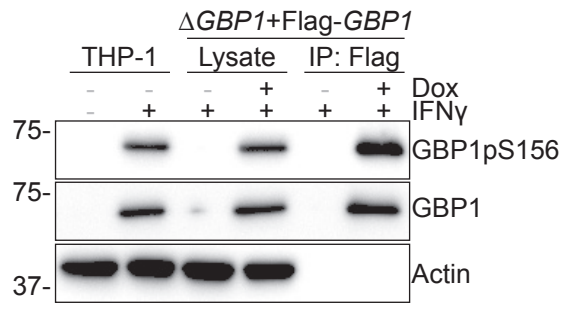

Uncropped gels with indicated size marker and crop area (lane annotation, if excluded from figure):

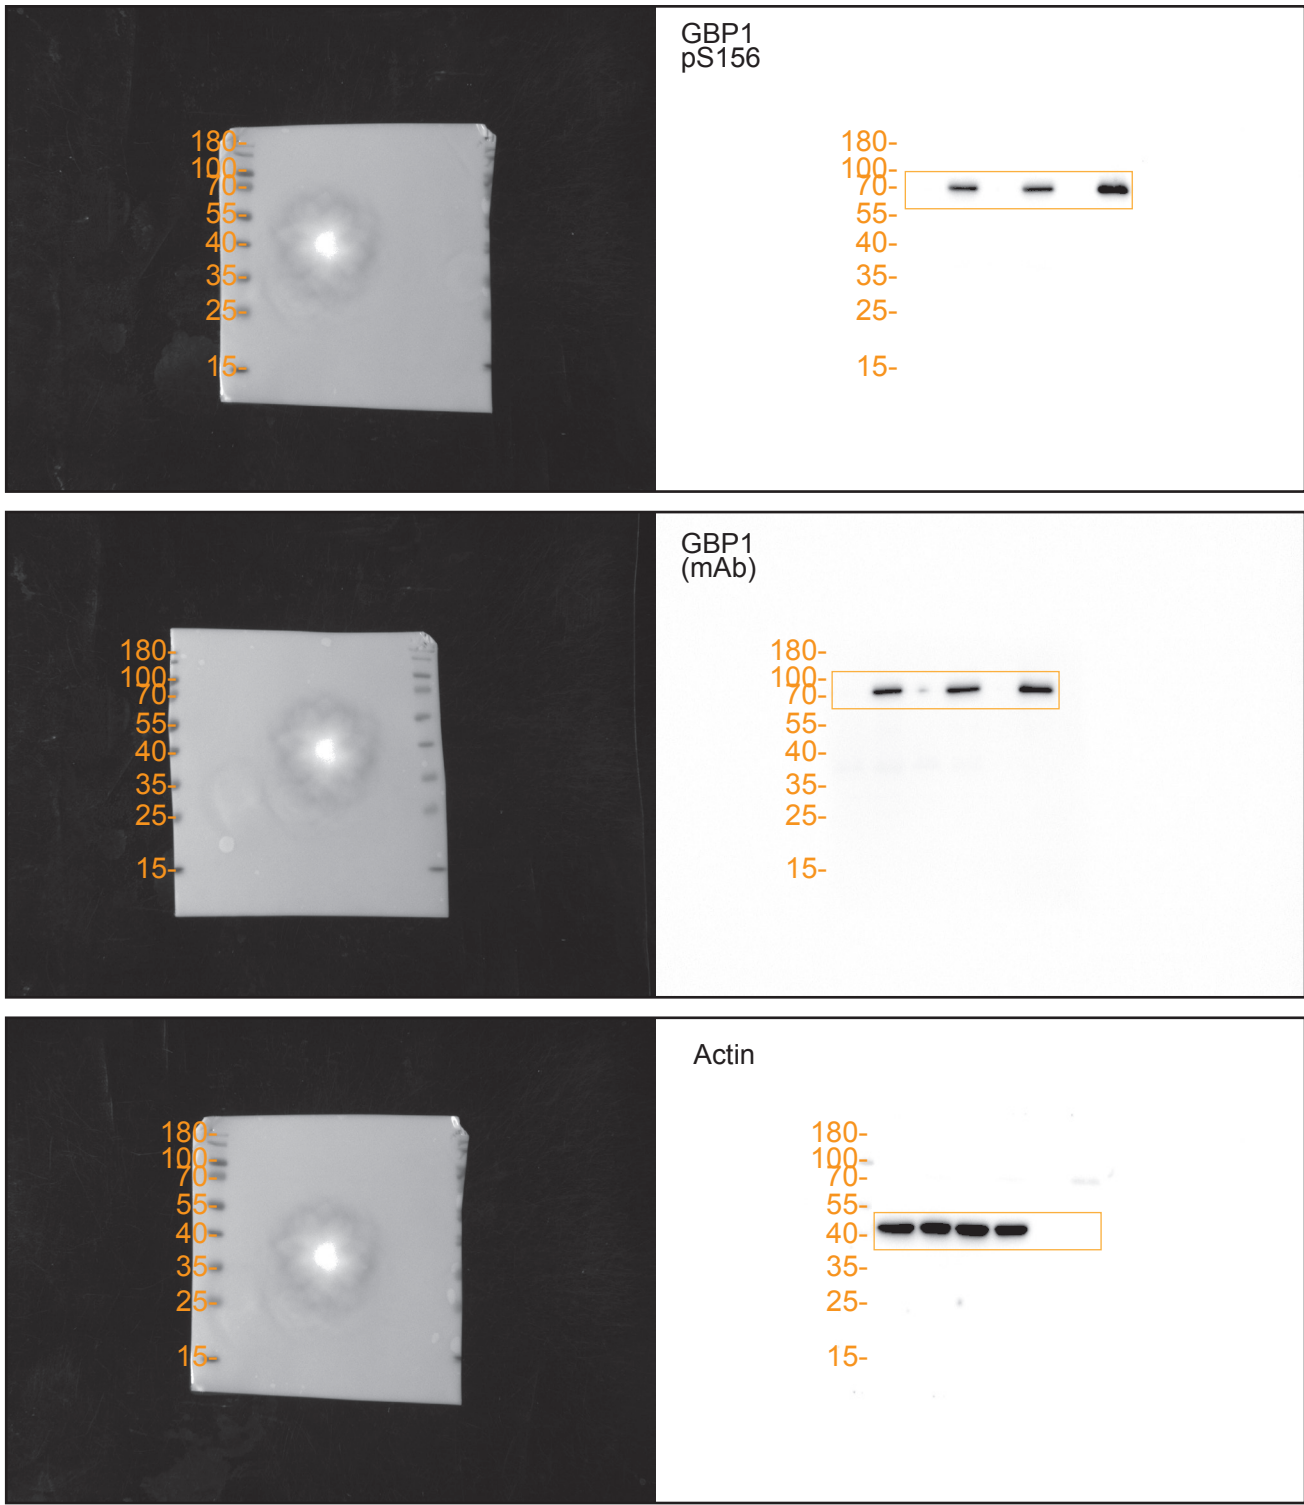

**Fig. 1F**

Figure as in manuscript:

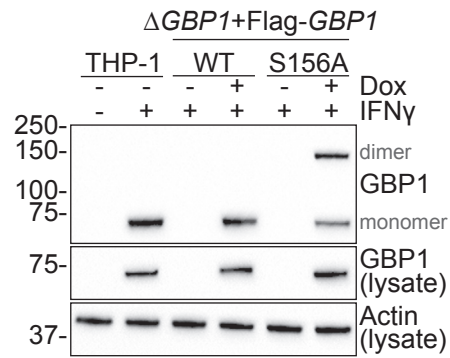

Uncropped gels with indicated size marker and crop area (lane annotation, if excluded from figure):

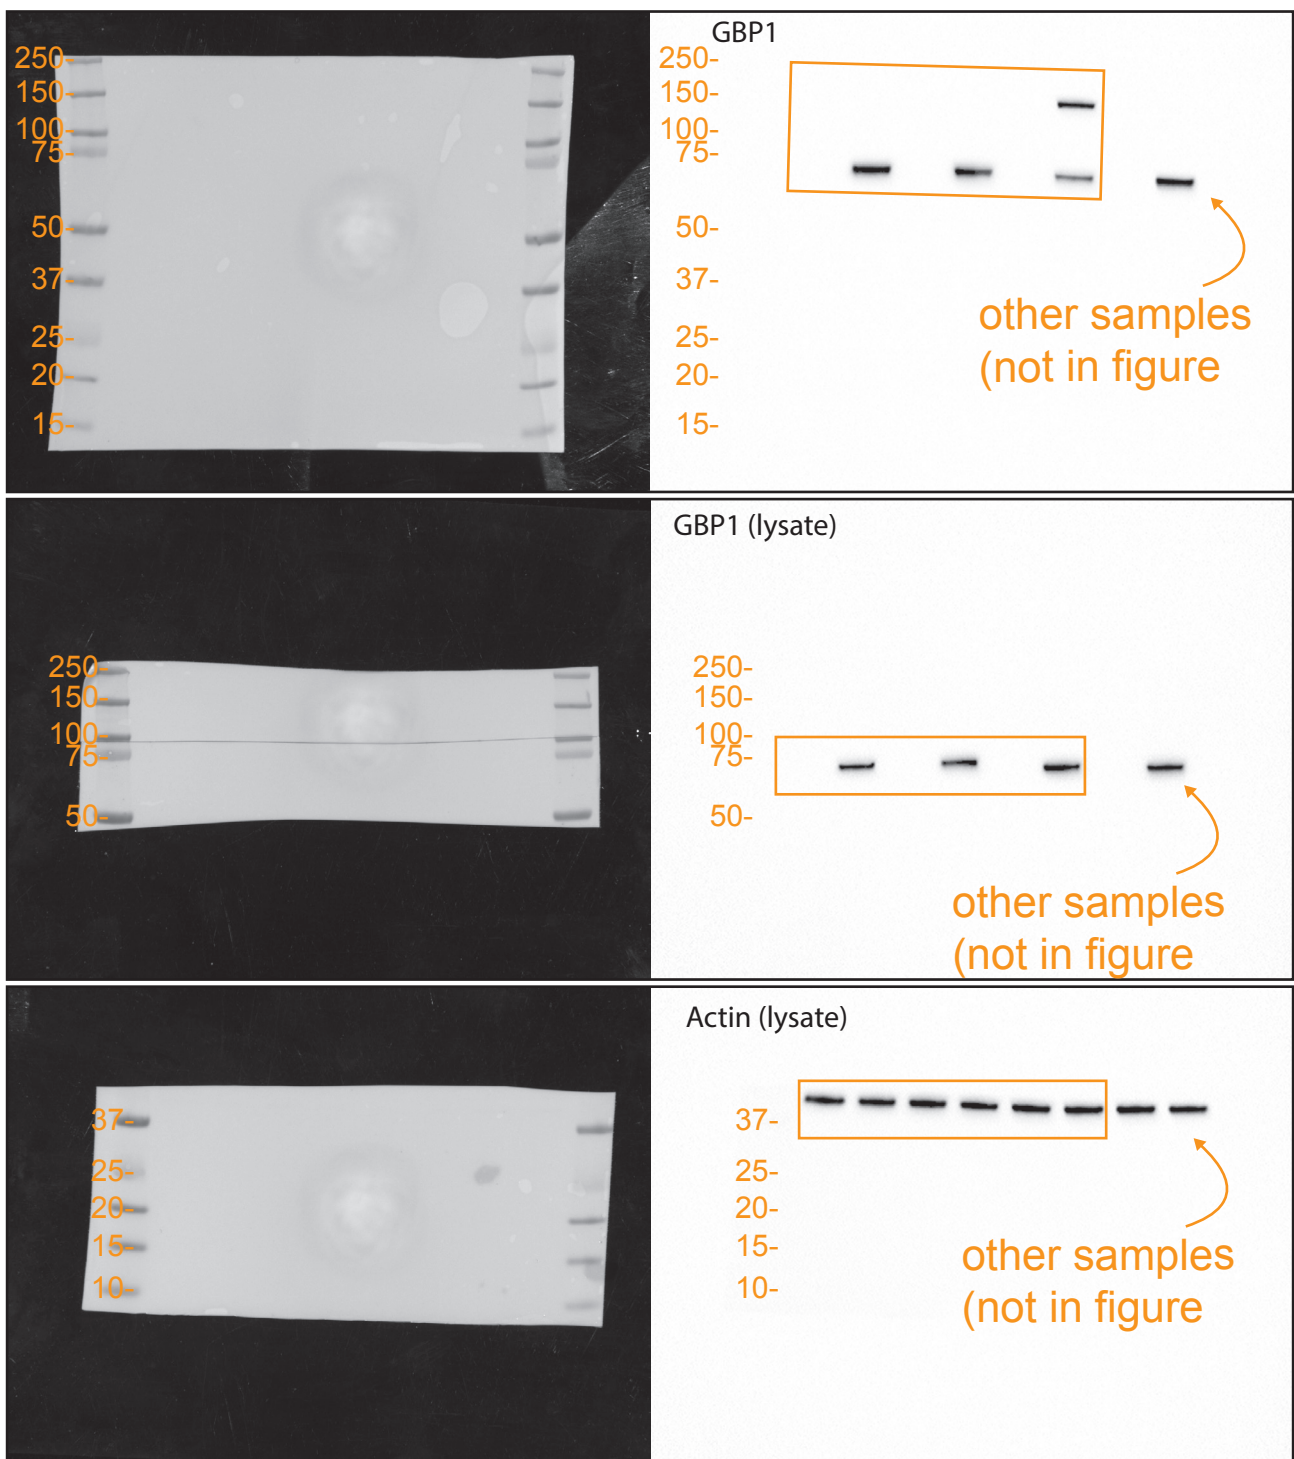



**Fig. 1G**

Figure as in manuscript:

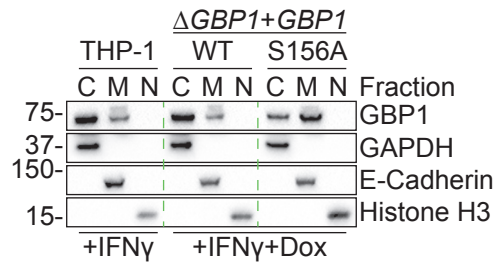

Uncropped gels with indicated size marker and crop area (lane annotation, if excluded from figure):

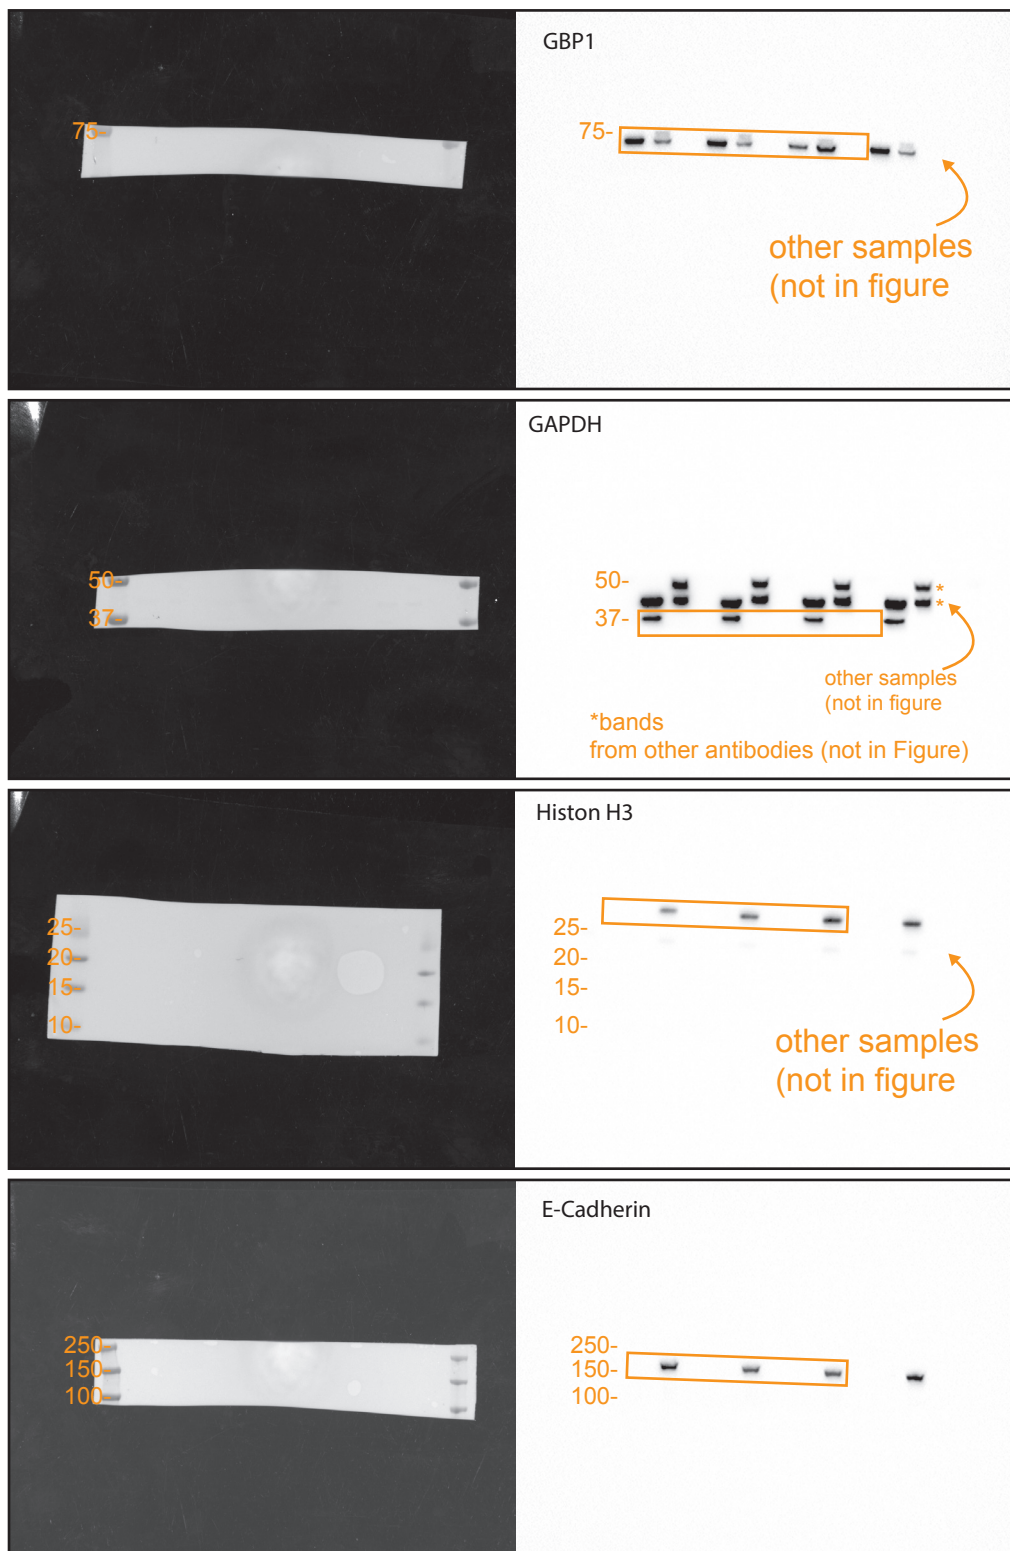



**Fig. 2A**

$\Delta$ GBP1+Flag-GBP1 cells+IFN $\gamma$ +Dox  
Lysate:

Figure as in manuscript:  
(Quantifications removed)

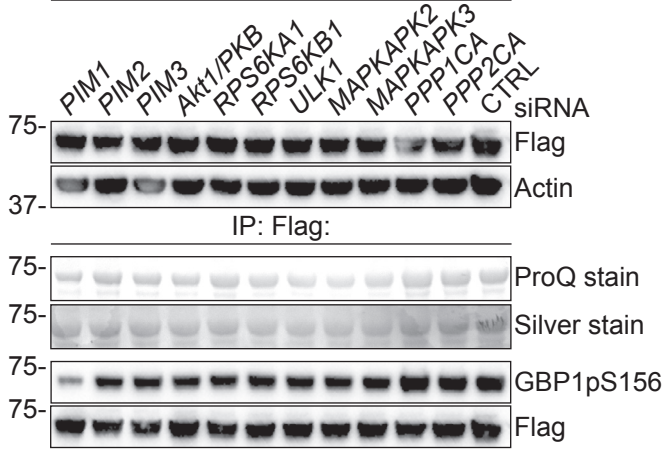

Uncropped gels with indicated size marker and crop area (lane annotation, if excluded from figure):

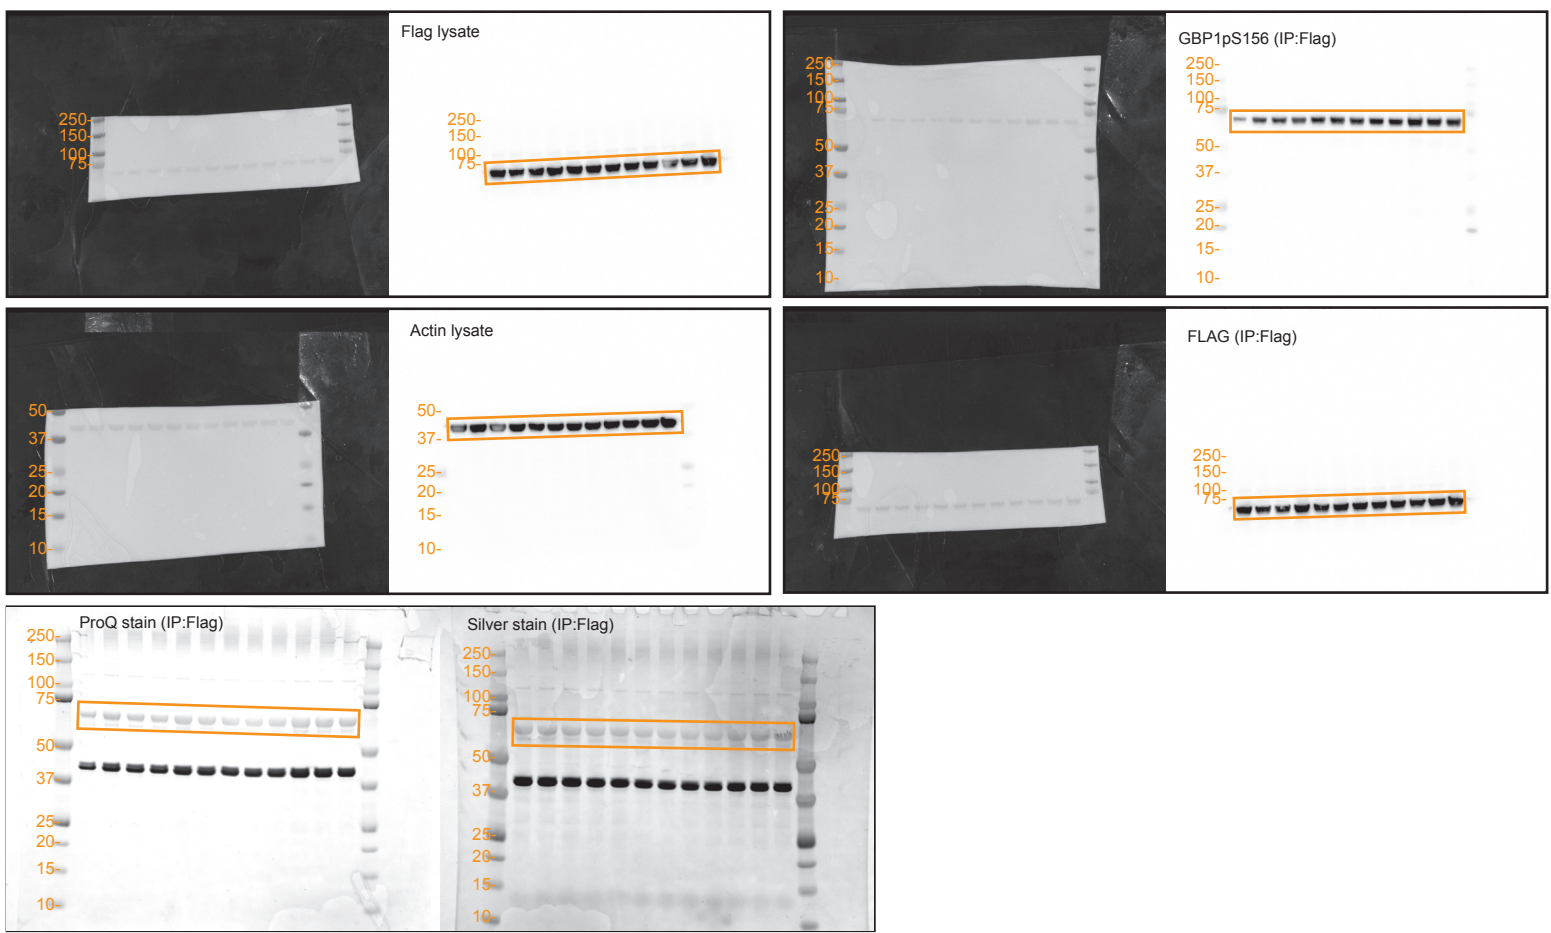



**Fig. 2C**

Figure as in manuscript:

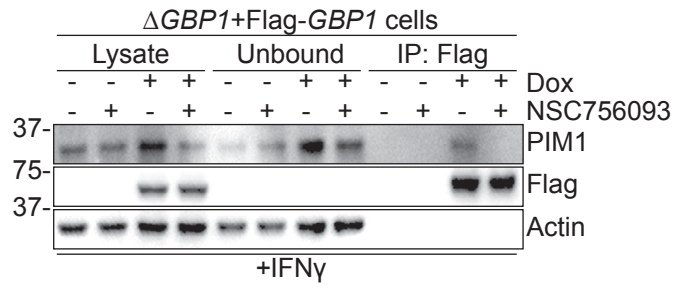

Uncropped gels with indicated size marker and crop area (lane annotation, if excluded from figure):

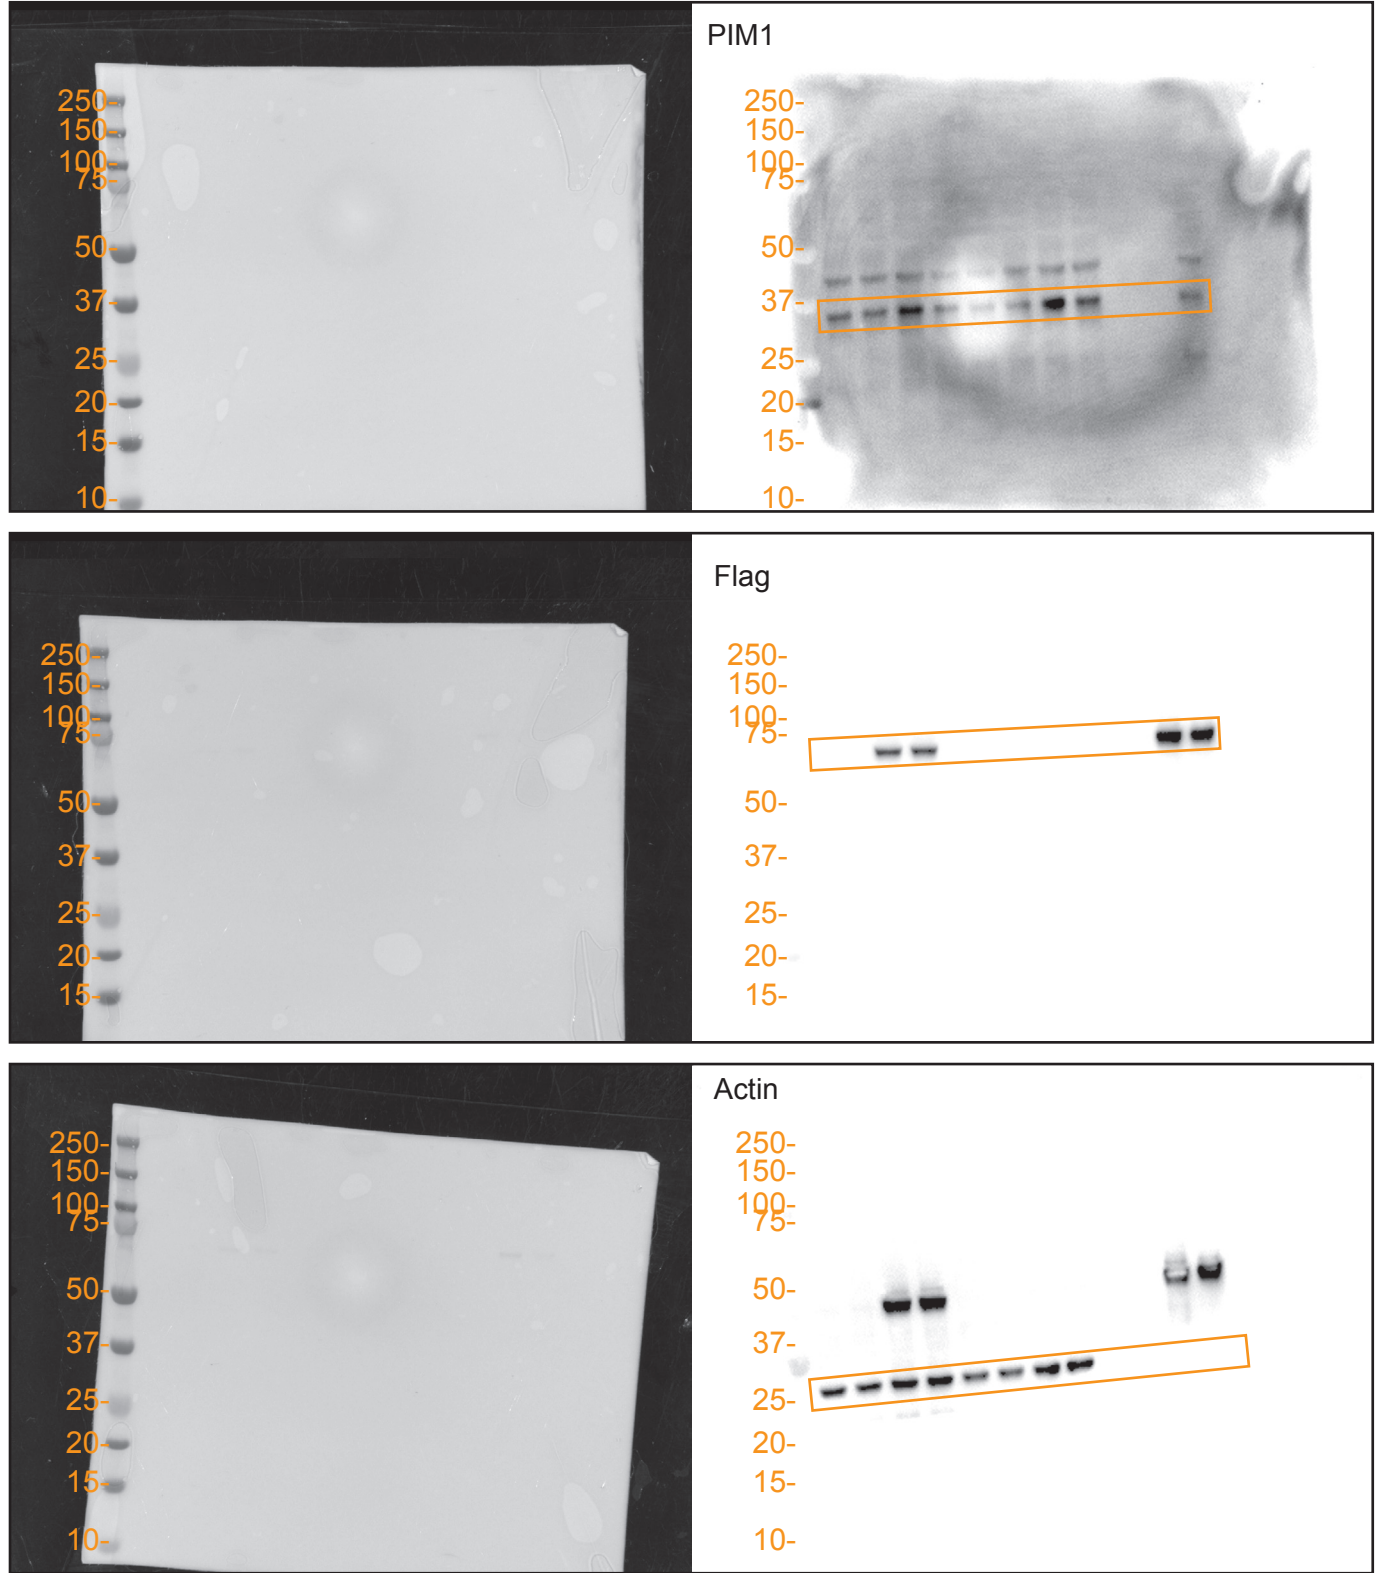



**Fig. 2D**

Figure as in manuscript:

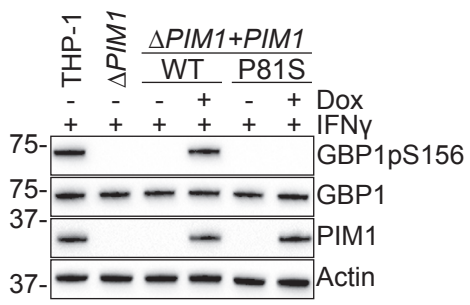

Uncropped gels with indicated size marker and crop area (lane annotation, if excluded from figure):

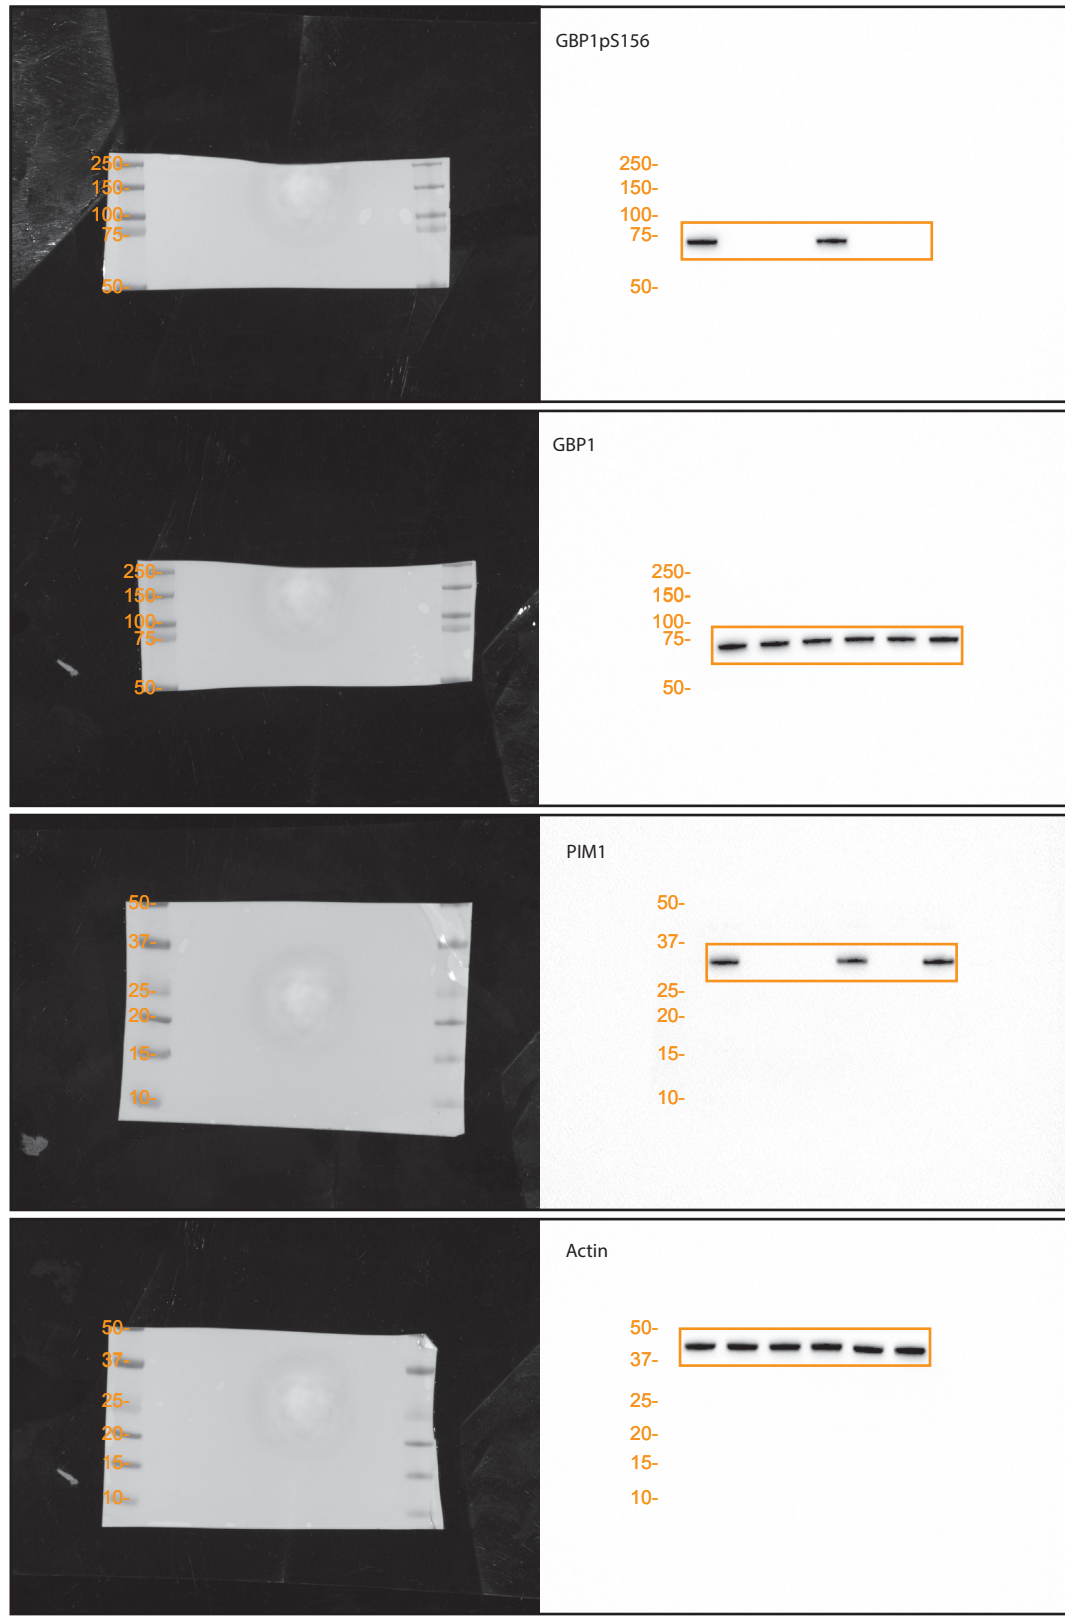

**Fig. 2E**

Figure as in manuscript:

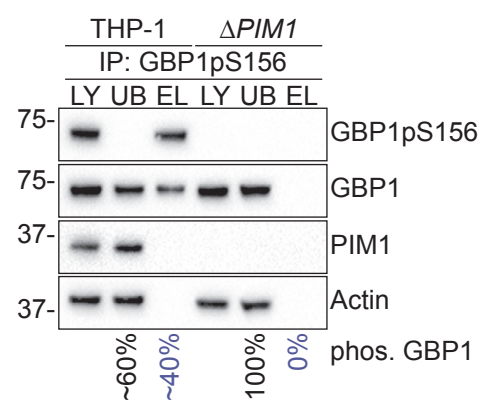

Uncropped gels with indicated size marker and crop area (lane annotation, if excluded from figure):

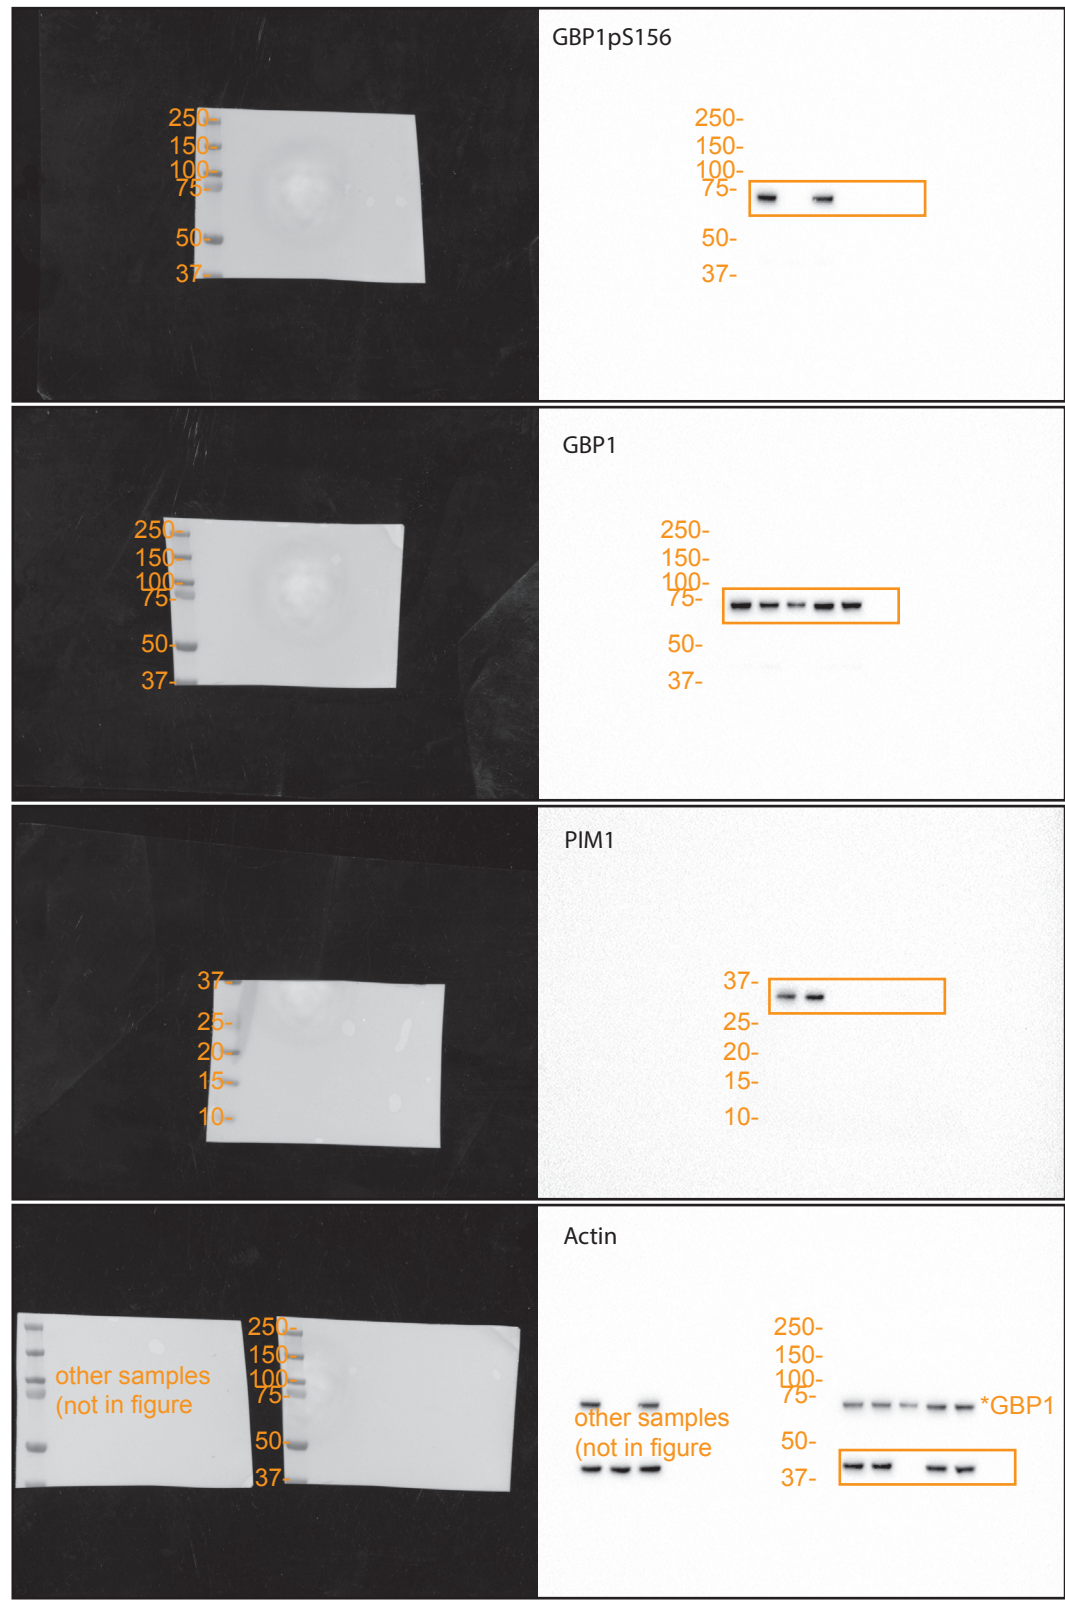







**Fig. 4C**

Figure as in manuscript:

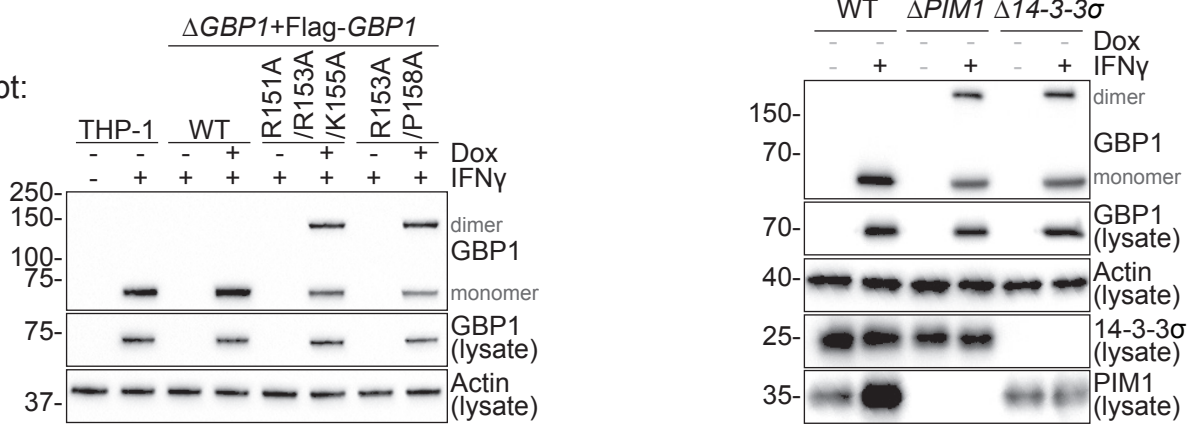

Uncropped gels with indicated size marker and crop area (lane annotation, if excluded from figure):

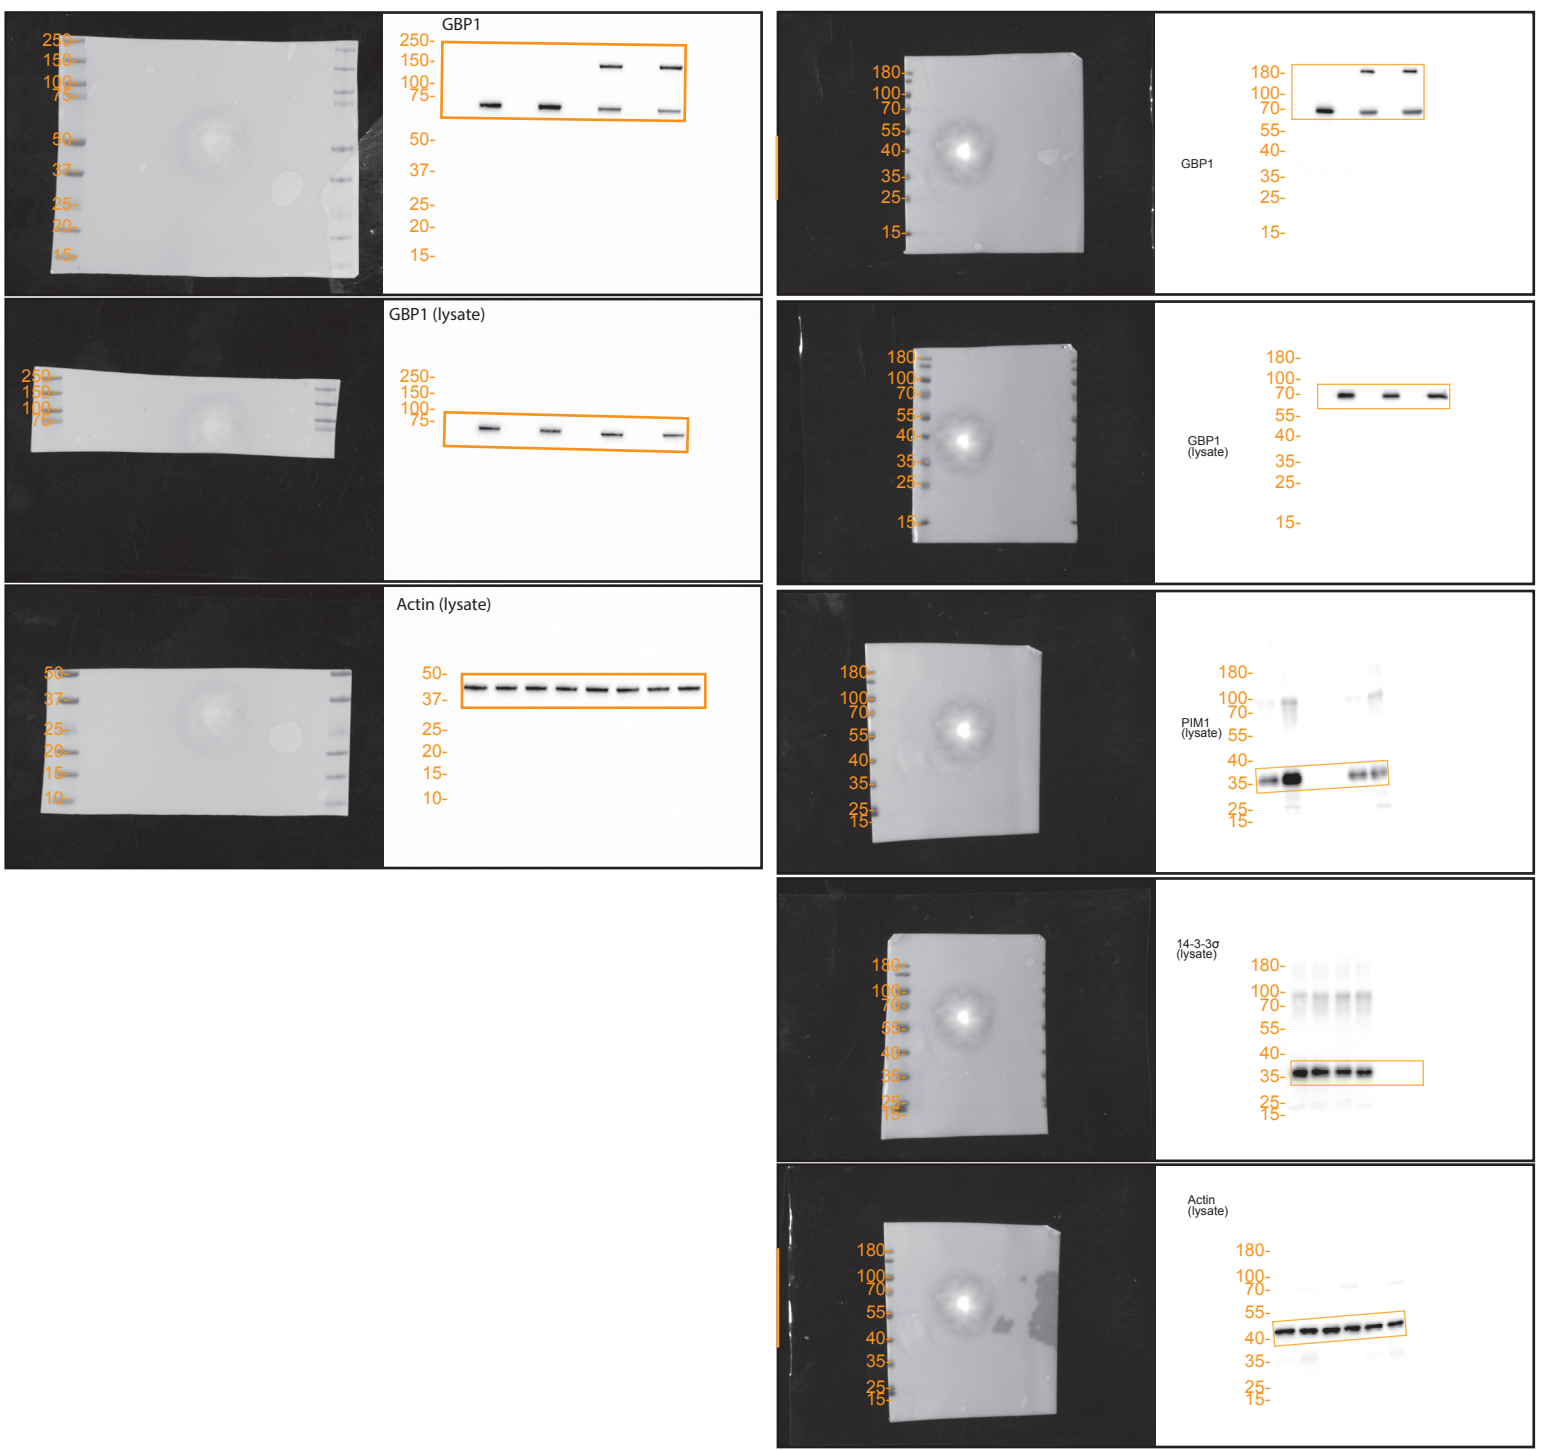

**Fig. 4D**

Figure as in manuscript:

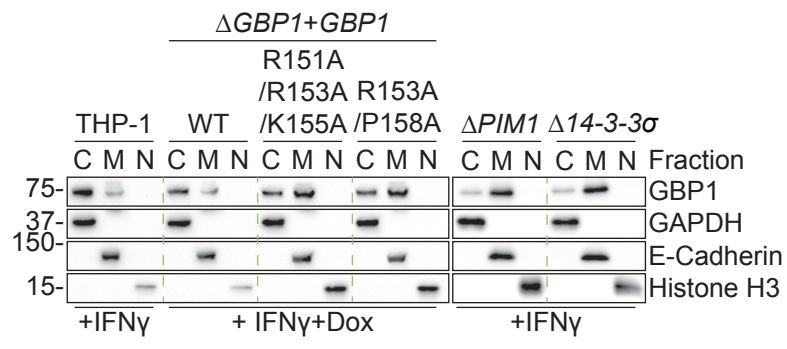

Uncropped gels with indicated size marker and crop area (lane annotation, if excluded from figure):

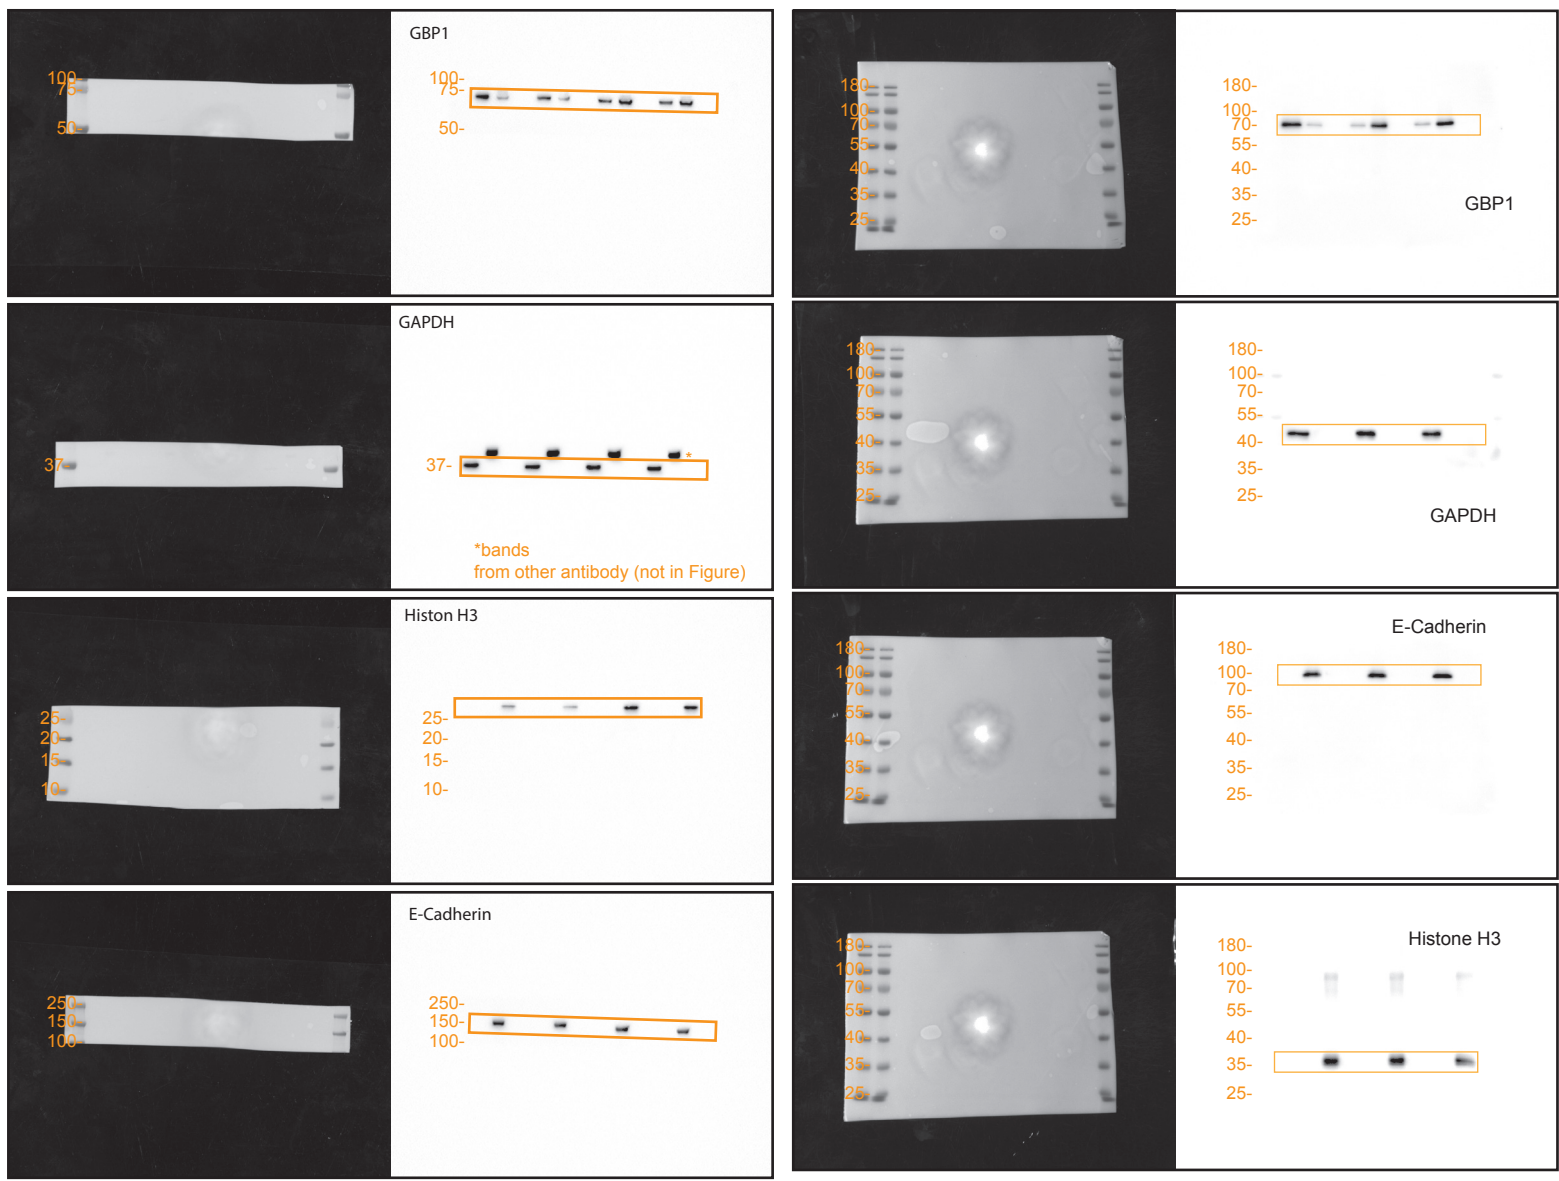

**Fig. 5B**

Figure as in manuscript:

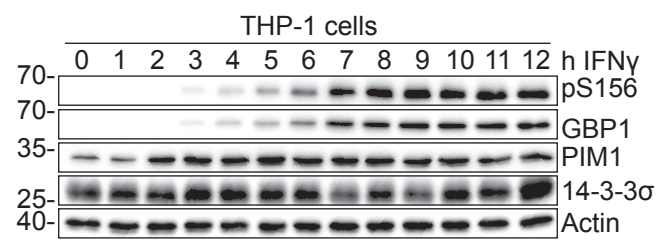

Uncropped gels with indicated size marker and crop area (lane annotation, if excluded from figure):

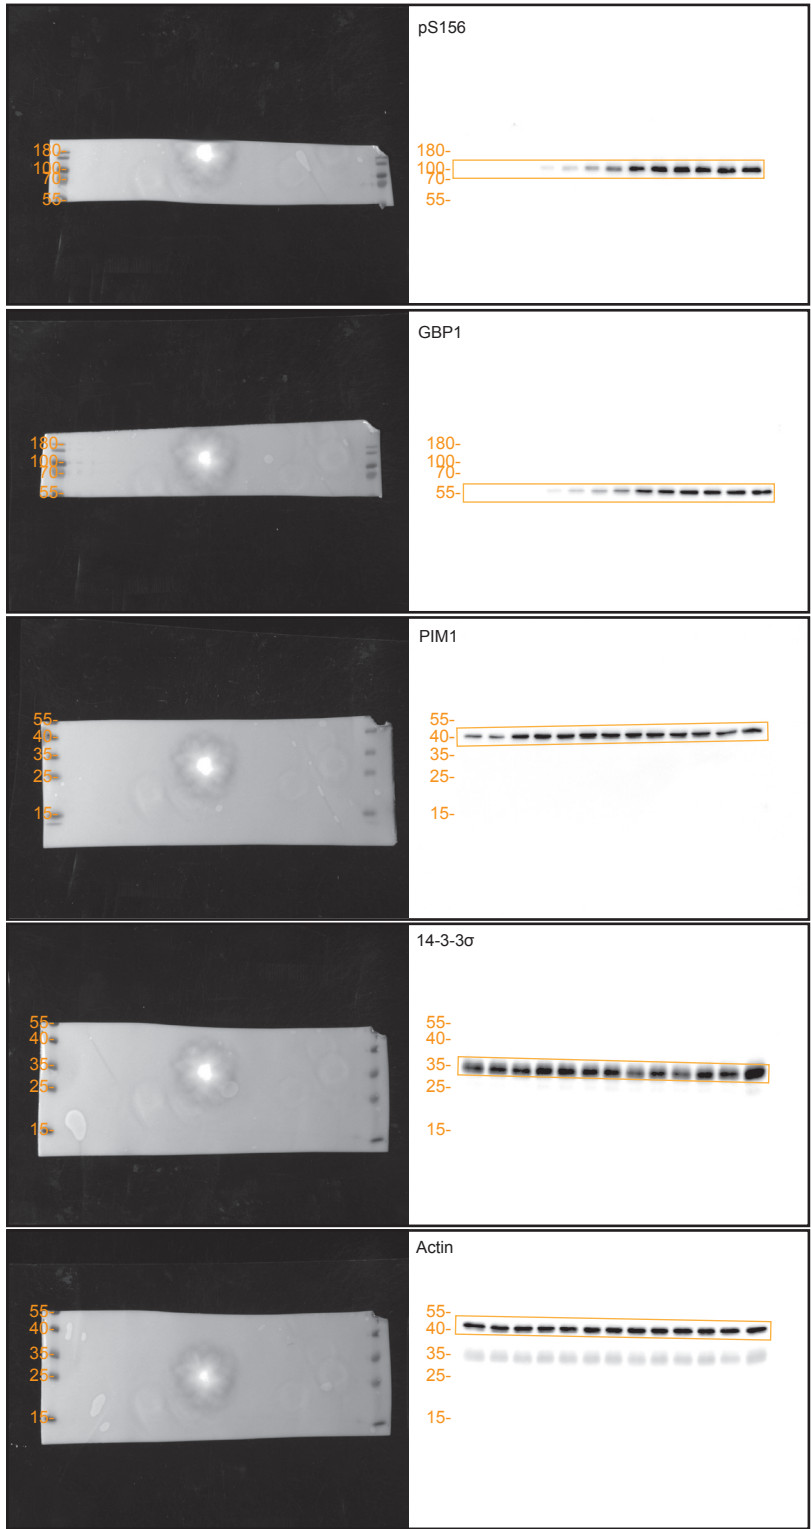



**Fig. 5C**

Figure as in manuscript:

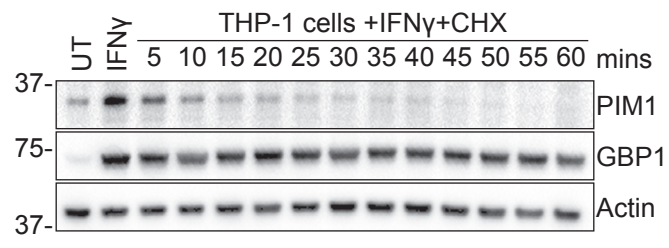

Uncropped gels with indicated size marker and crop area (lane annotation, if excluded from figure):

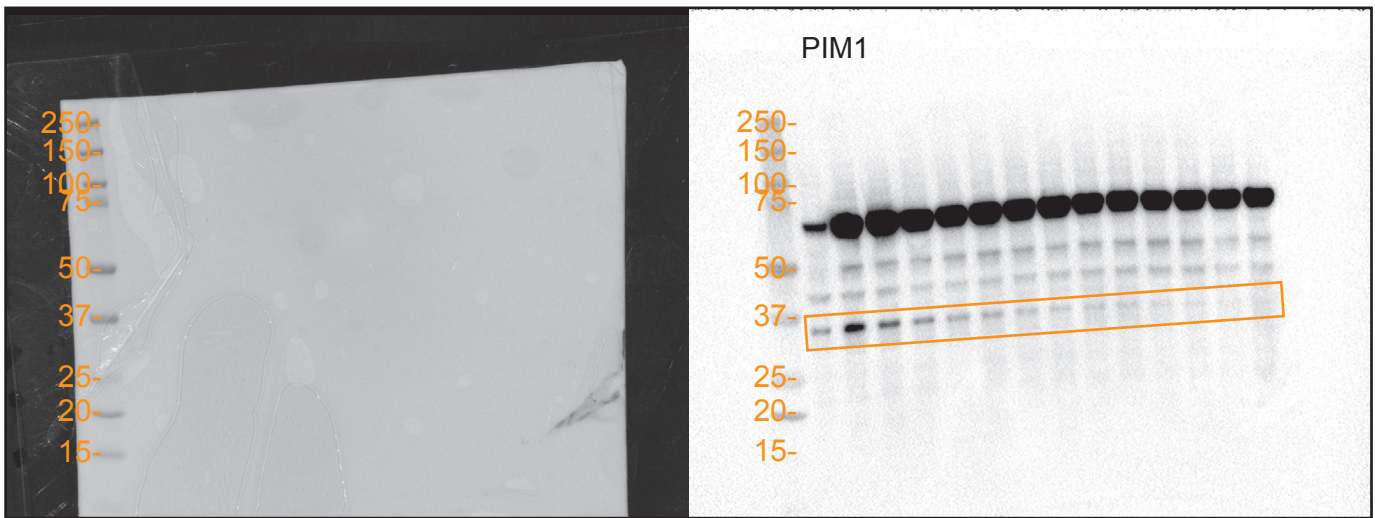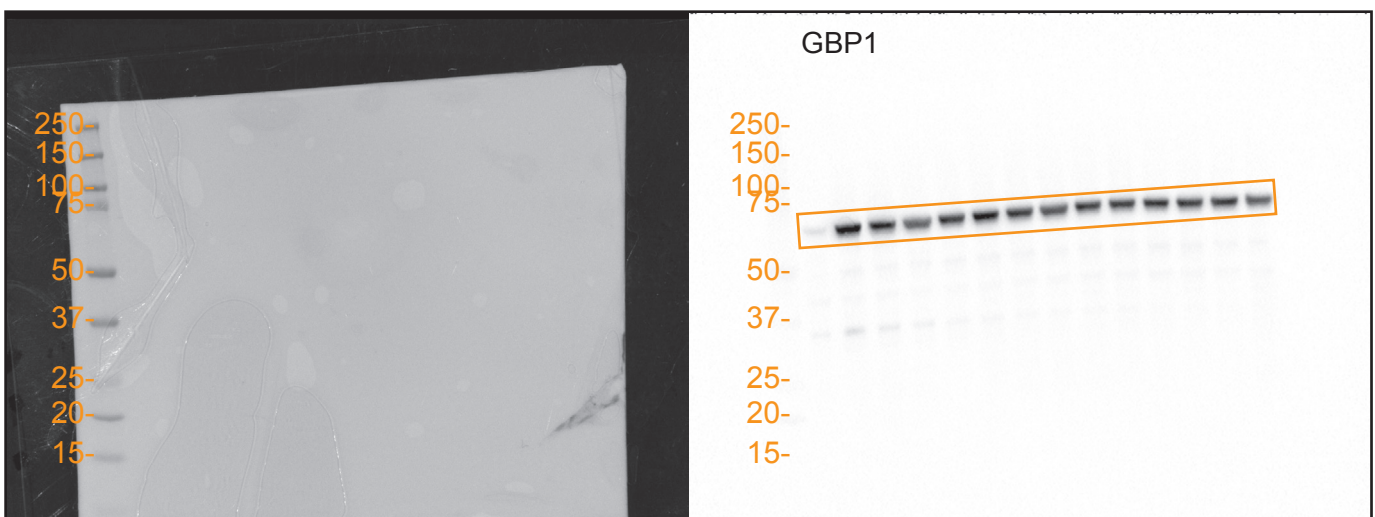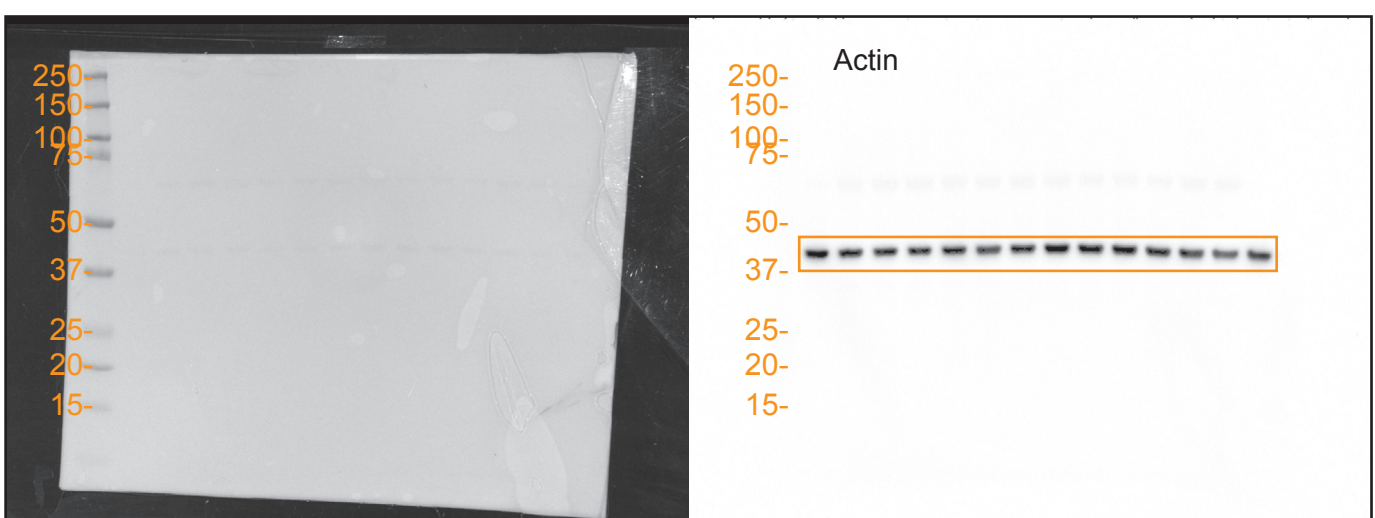

**Fig. 5E**

Figure as in manuscript:

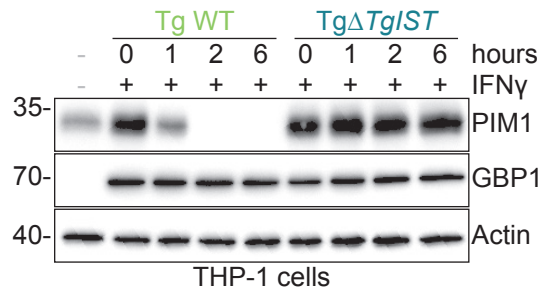

Uncropped gels with indicated size marker and crop area (lane annotation, if excluded from figure):

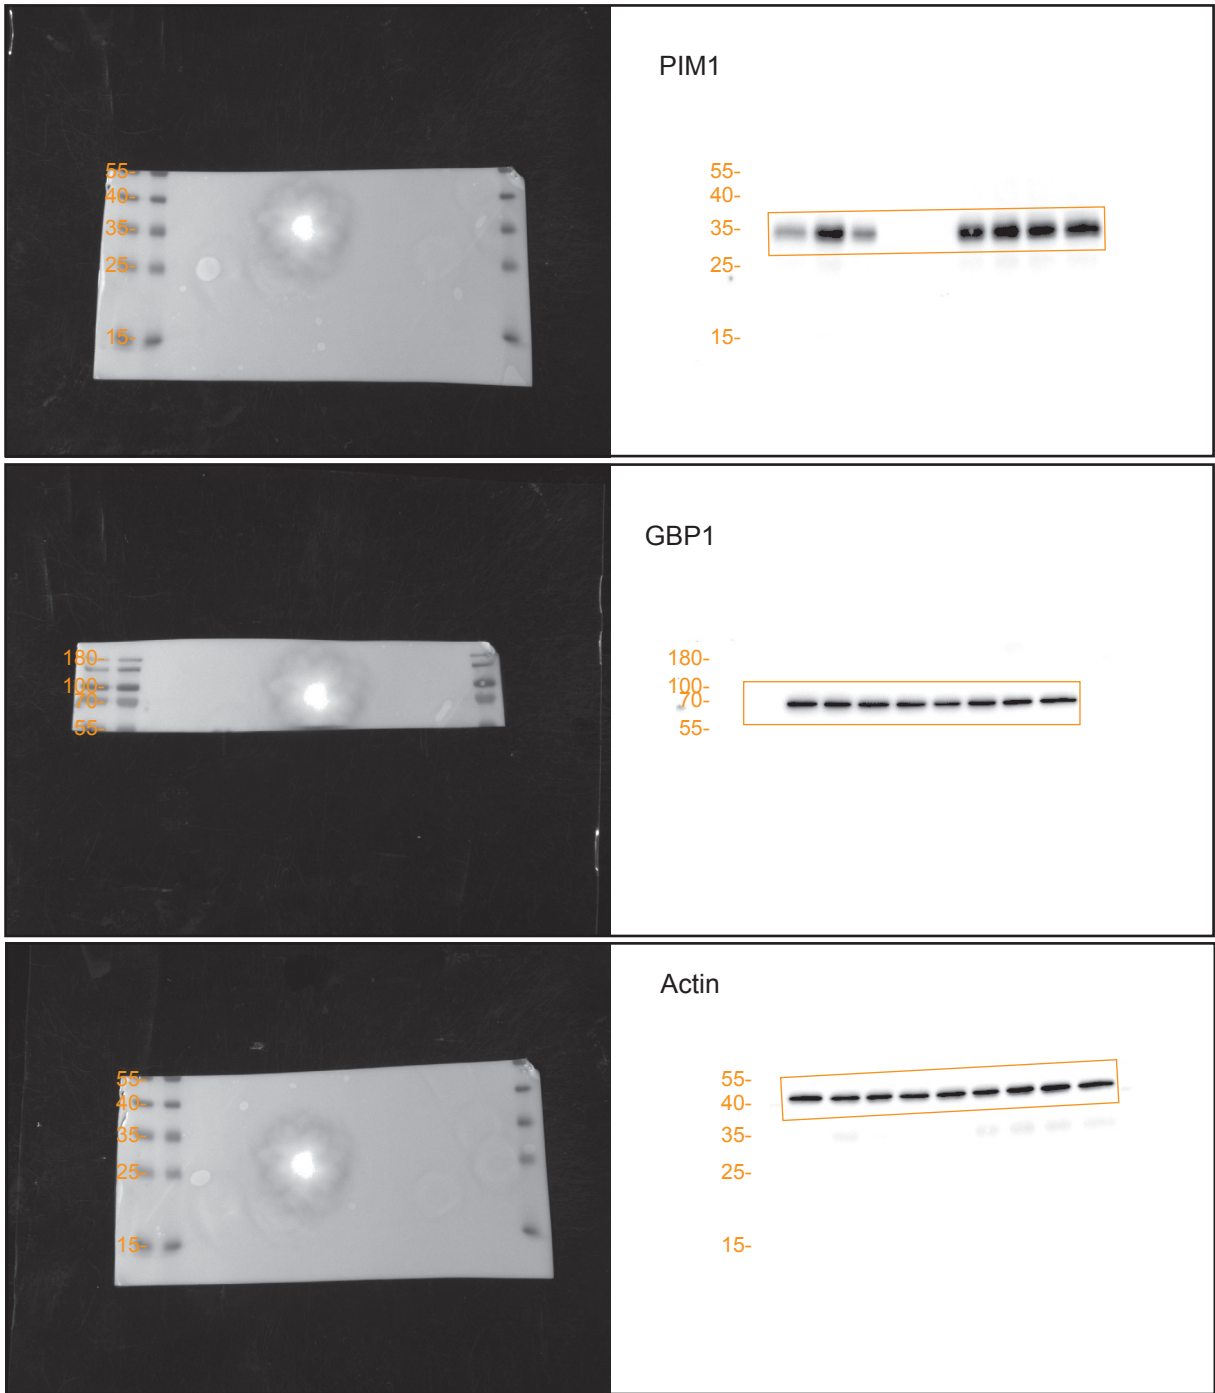

**Fig. 5F**

Figure as in manuscript:

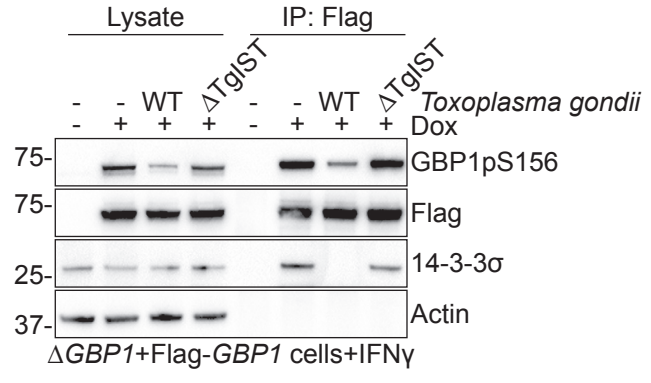

Uncropped gels with indicated size marker and crop area (lane annotation, if excluded from figure):

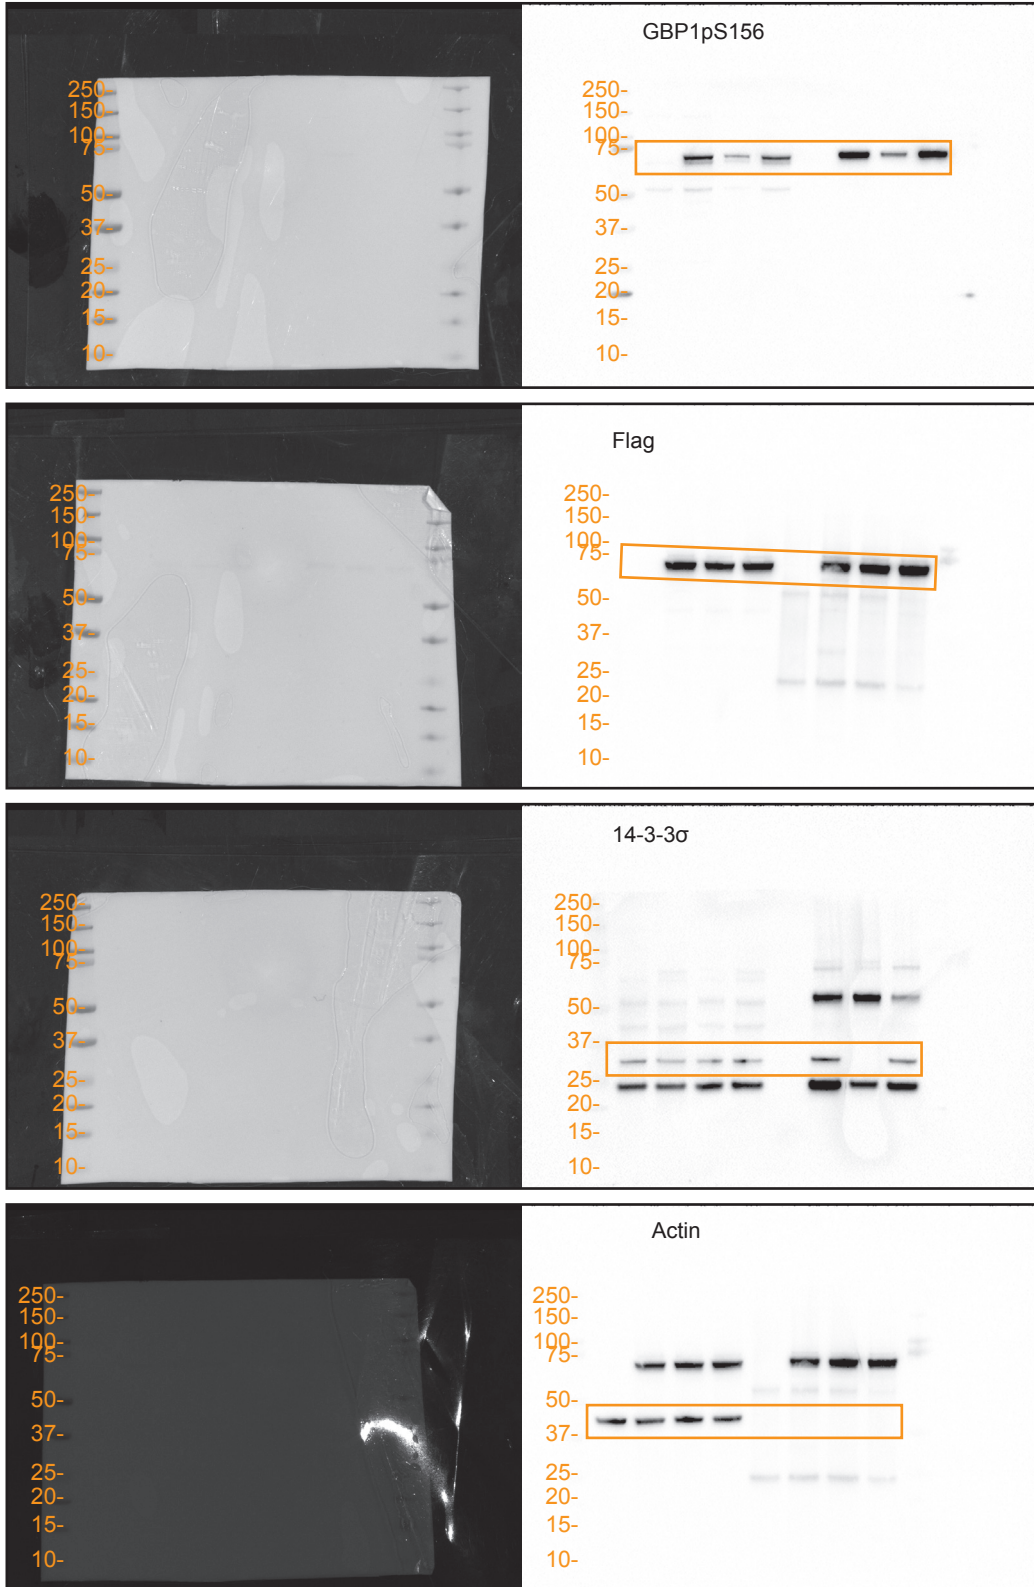



# Fig. S1 - part1

Figure as in manuscript:

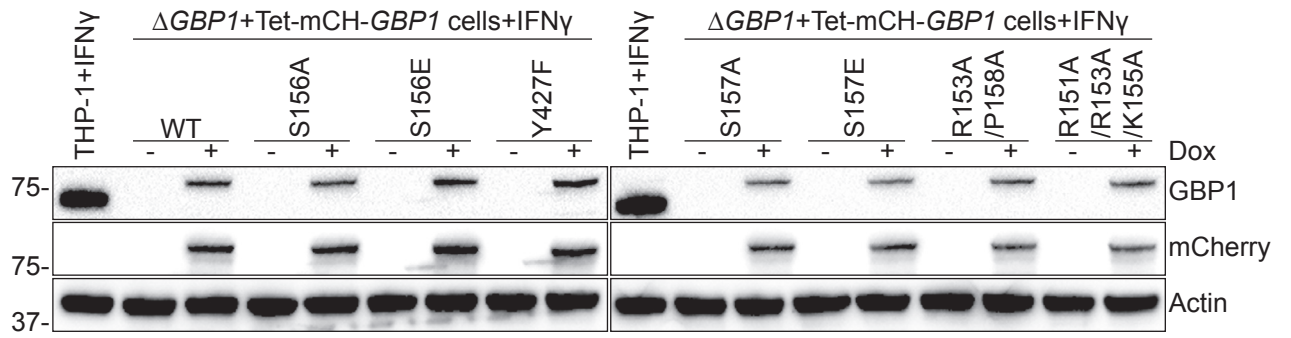

Uncropped gels with indicated size marker and crop area (lane annotation, if excluded from figure):

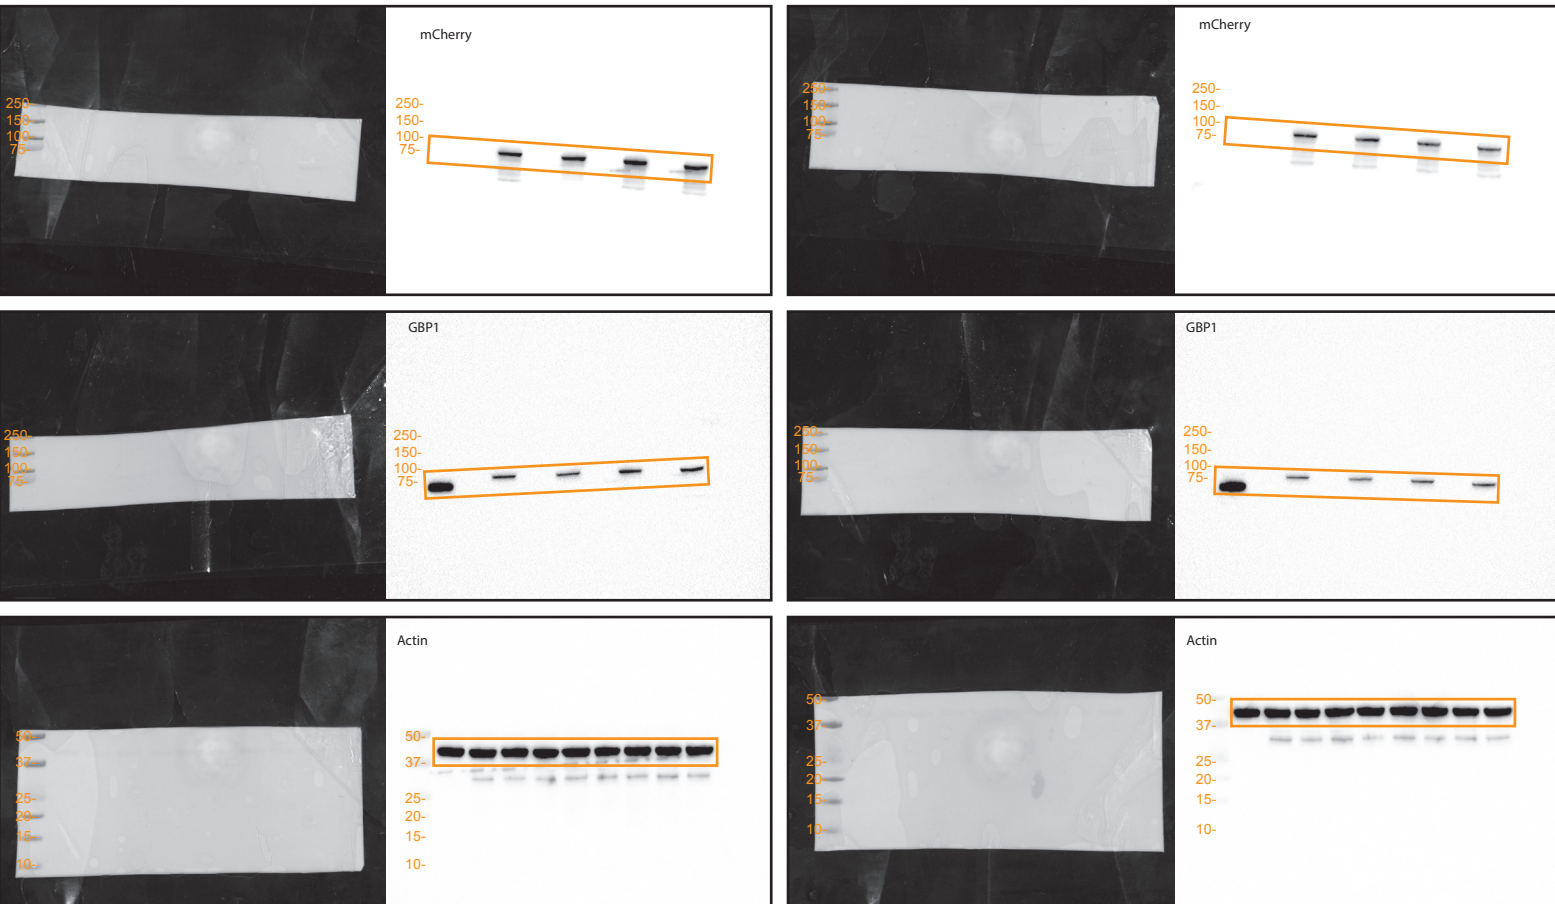

**Fig. S1 - part 2**

Figure as in manuscript:

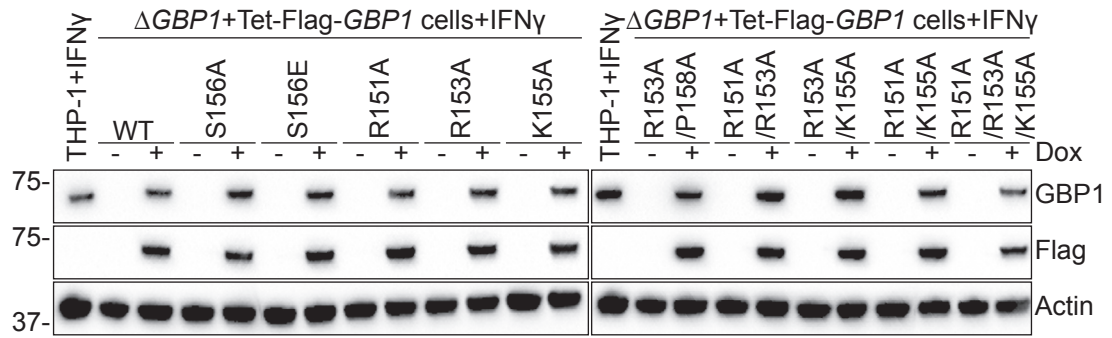

Uncropped gels with indicated size marker and crop area (lane annotation, if excluded from figure):

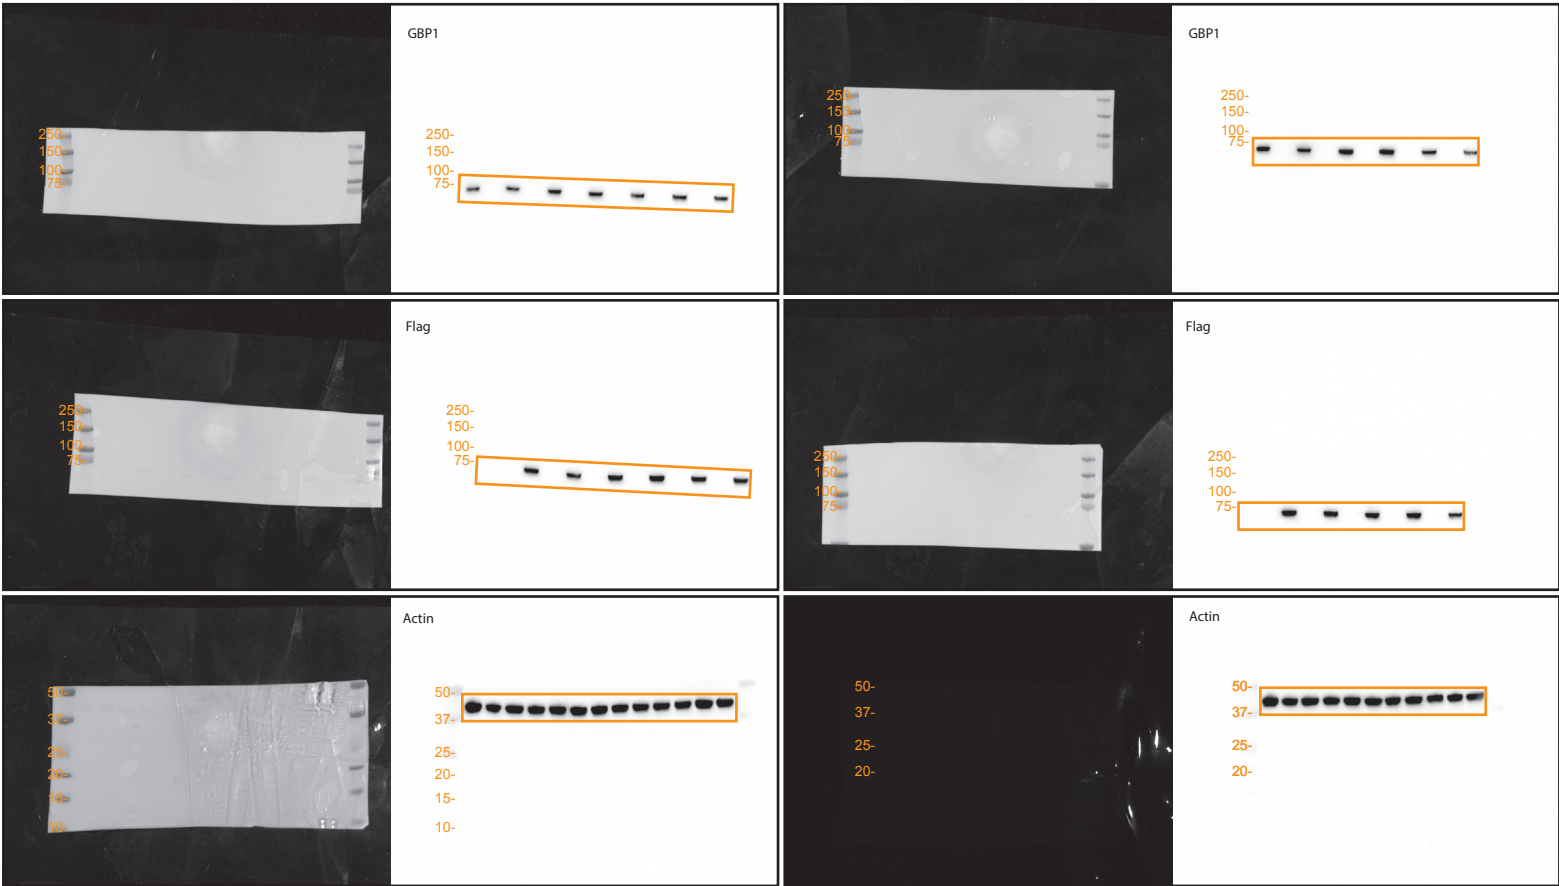





**Fig. S3C**

Figure as in manuscript:

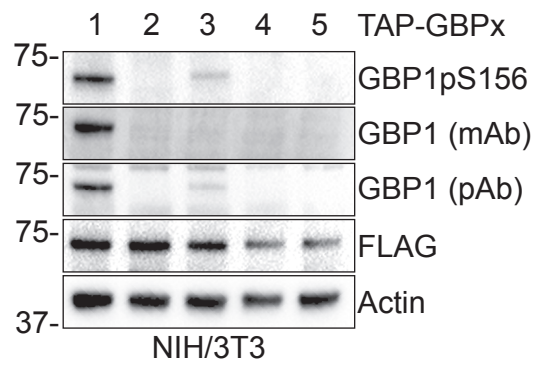

Uncropped gels with indicated size marker and crop area (lane annotation, if excluded from figure):

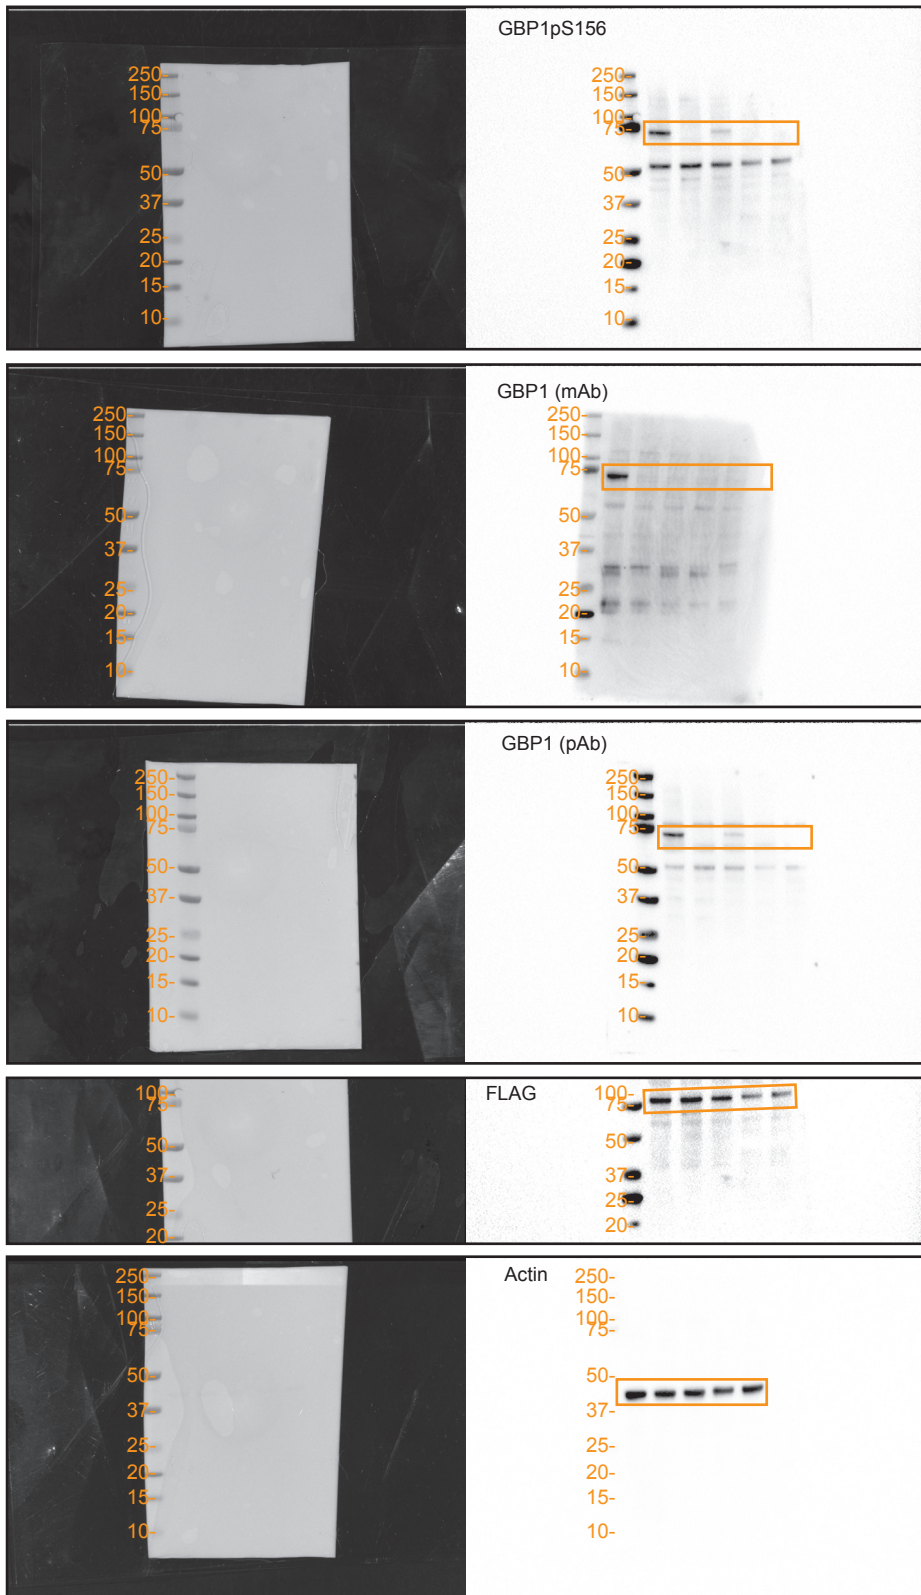

# Fig. S4B - part 1

Figure as in manuscript:

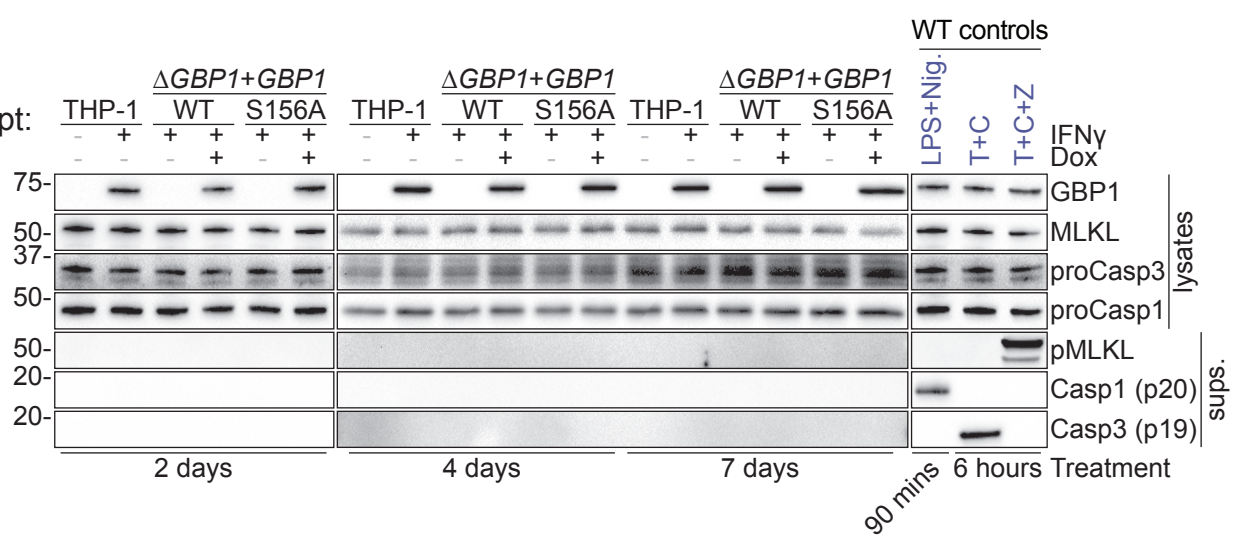

Uncropped gels with indicated size marker and crop area (lane annotation, if excluded from figure):

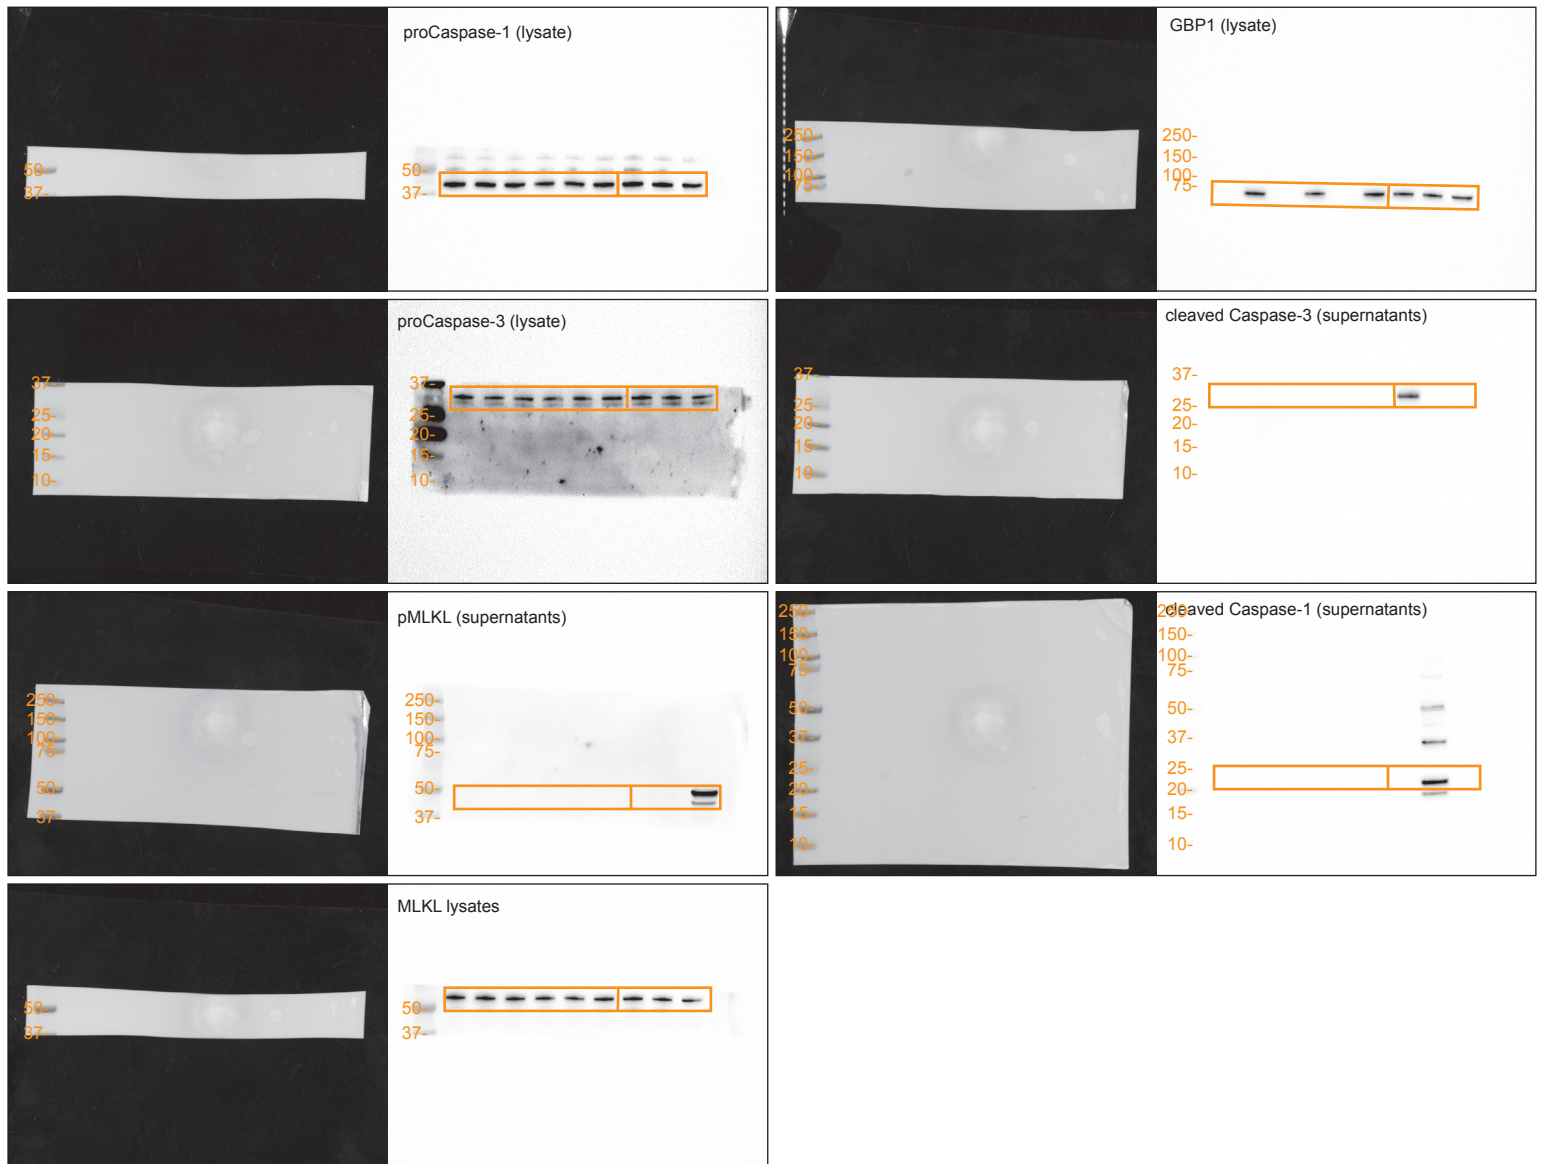



**Fig. S4B - part2**

Figure as in manuscript:

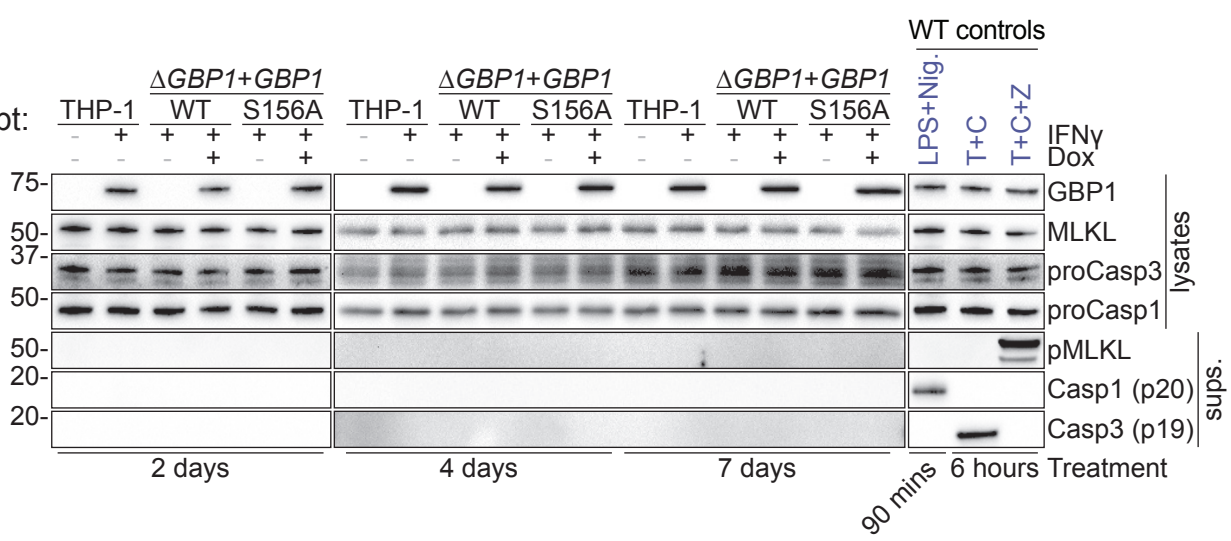

Uncropped gels with indicated size marker and crop area (lane annotation, if excluded from figure):

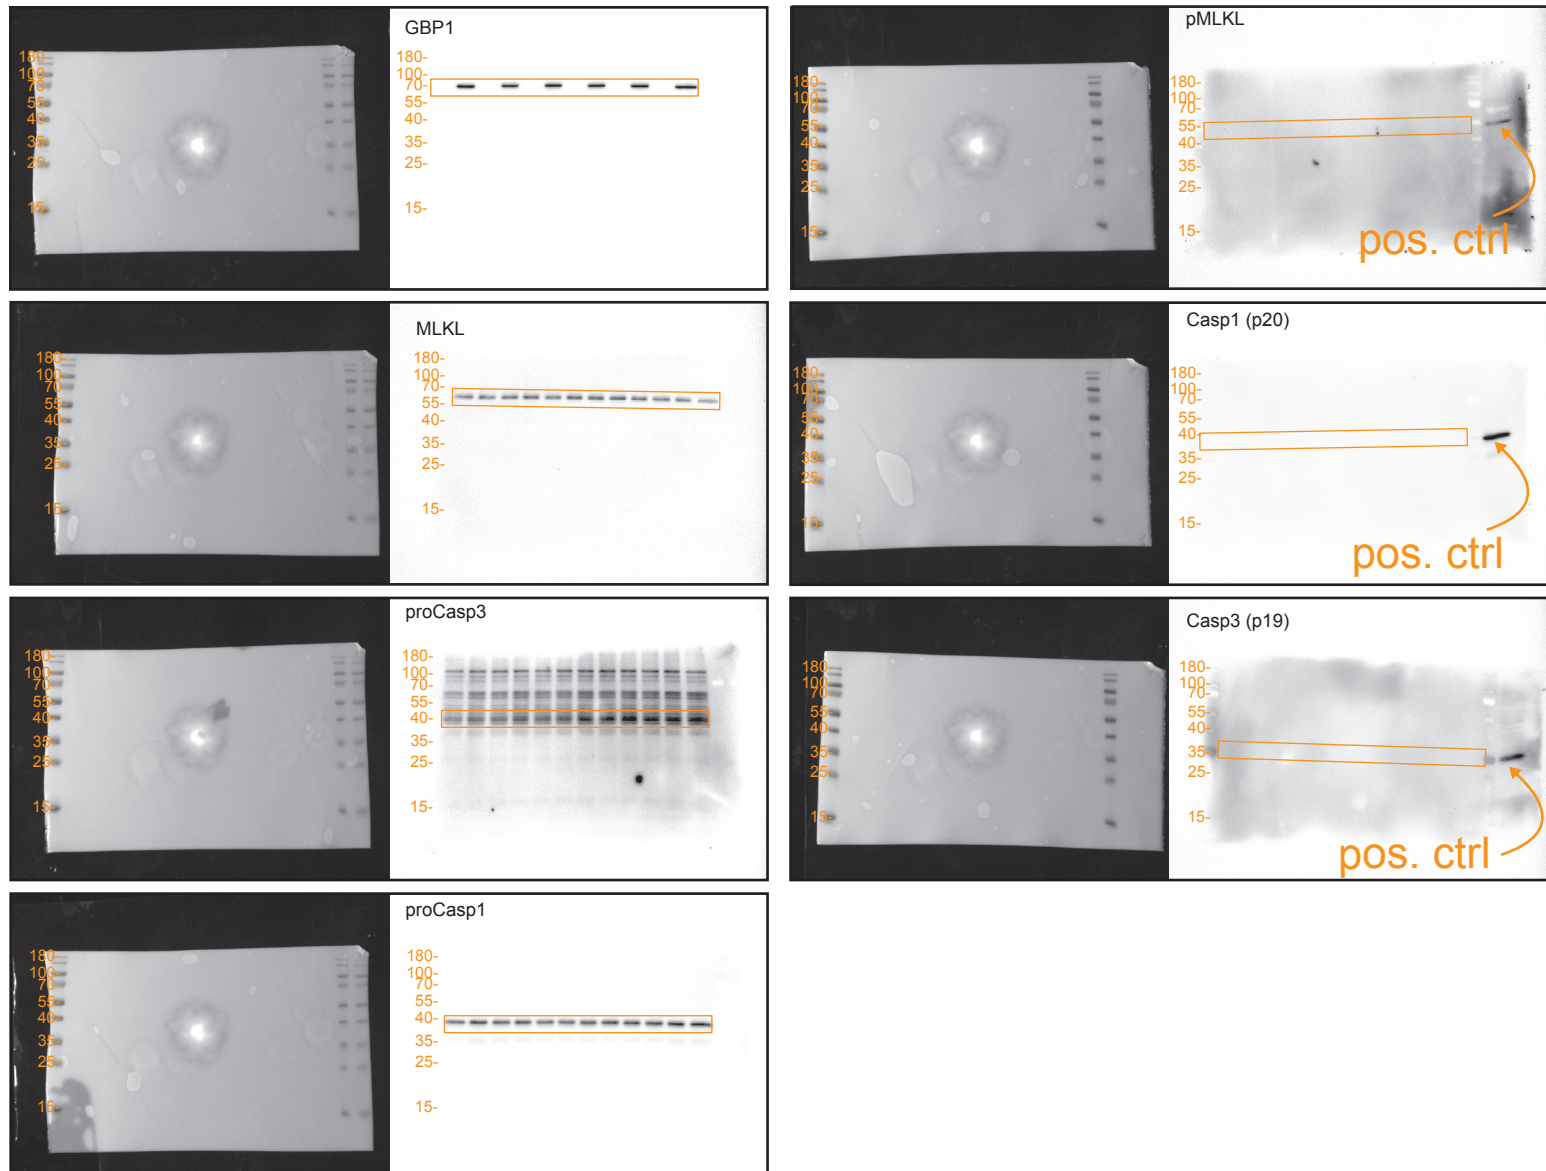



**Fig. S6B**

Figure as in manuscript:

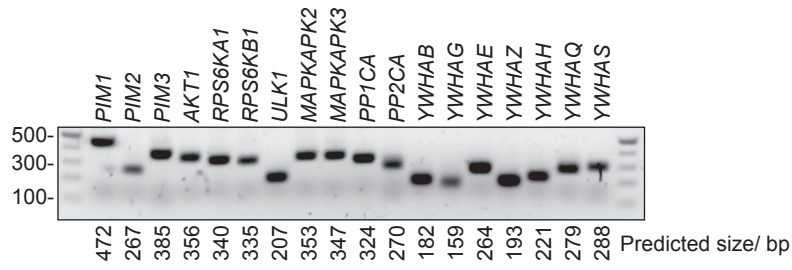

Uncropped gels with indicated size marker and crop area (lane annotation, if excluded from figure):

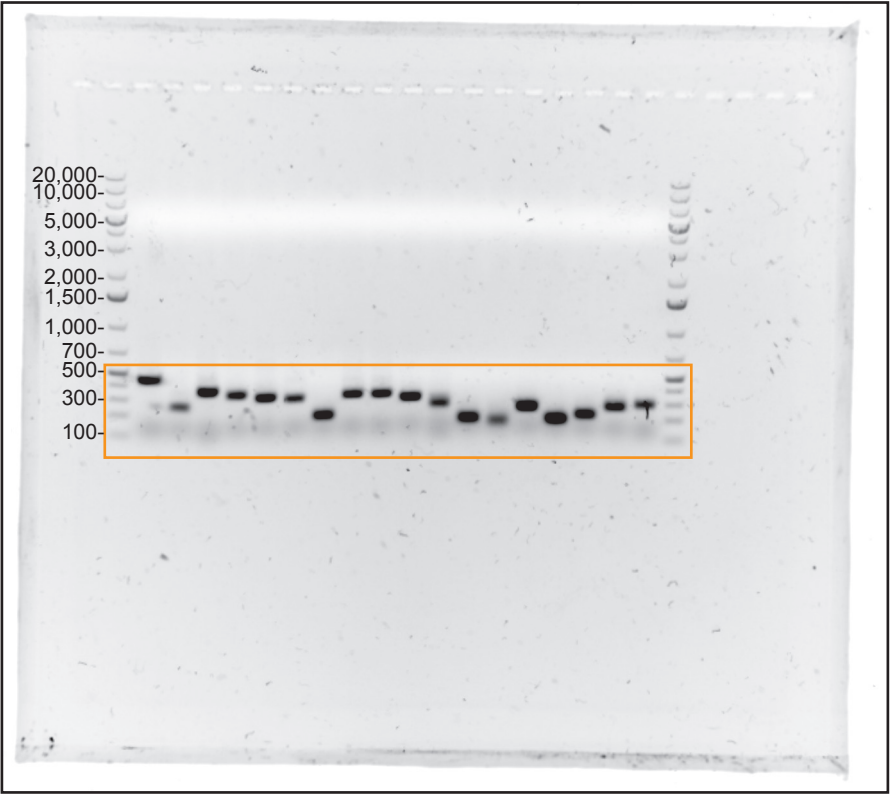

# Fig. S7A - part 1

Figure as in manuscript:

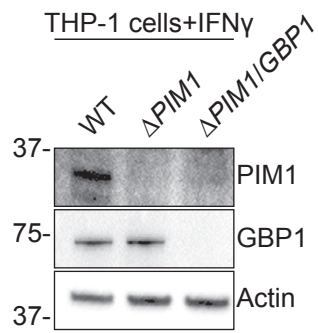

Uncropped gels with indicated size marker and crop area (lane annotation, if excluded from figure):

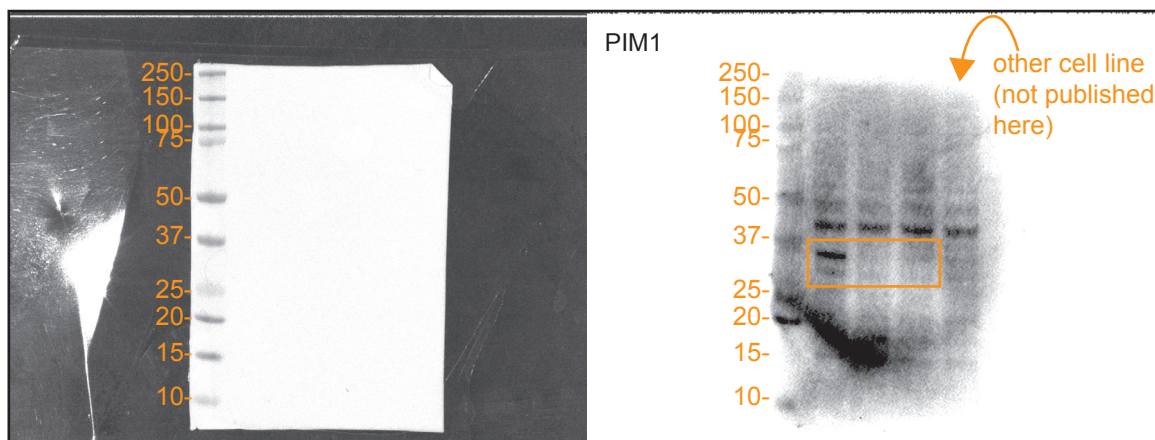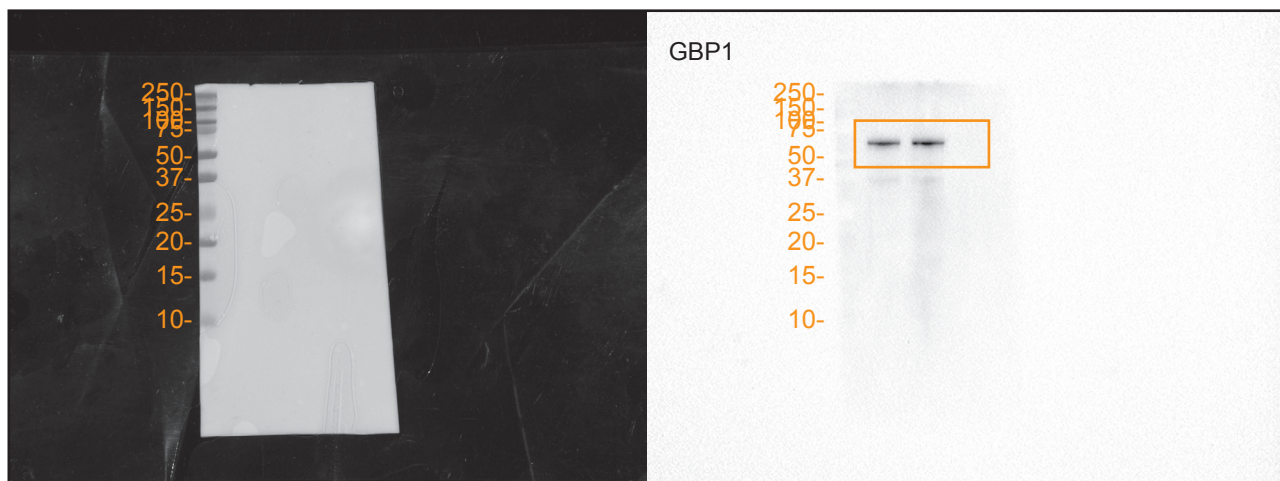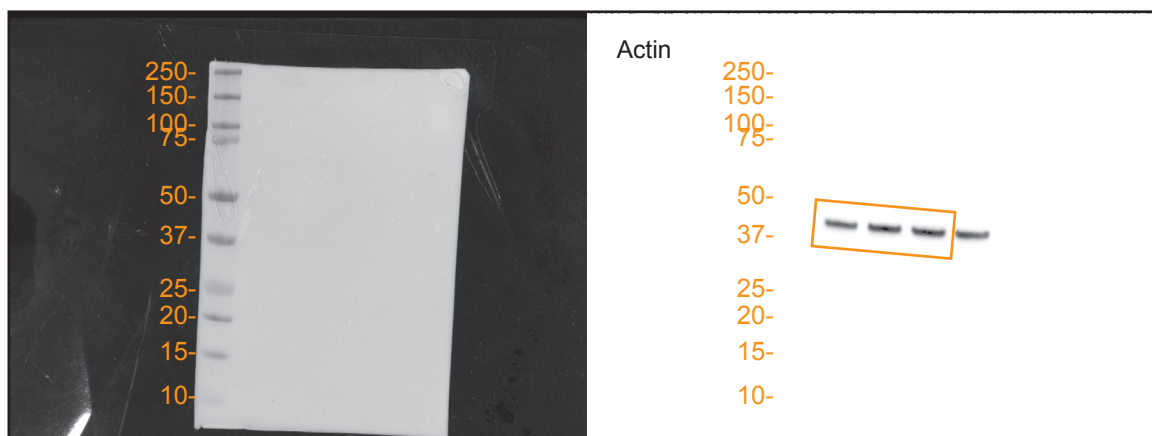

# Fig. S7A - part 2

Figure as in manuscript:

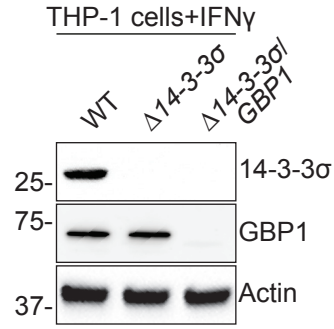

Uncropped gels with indicated size marker and crop area (lane annotation, if excluded from figure):

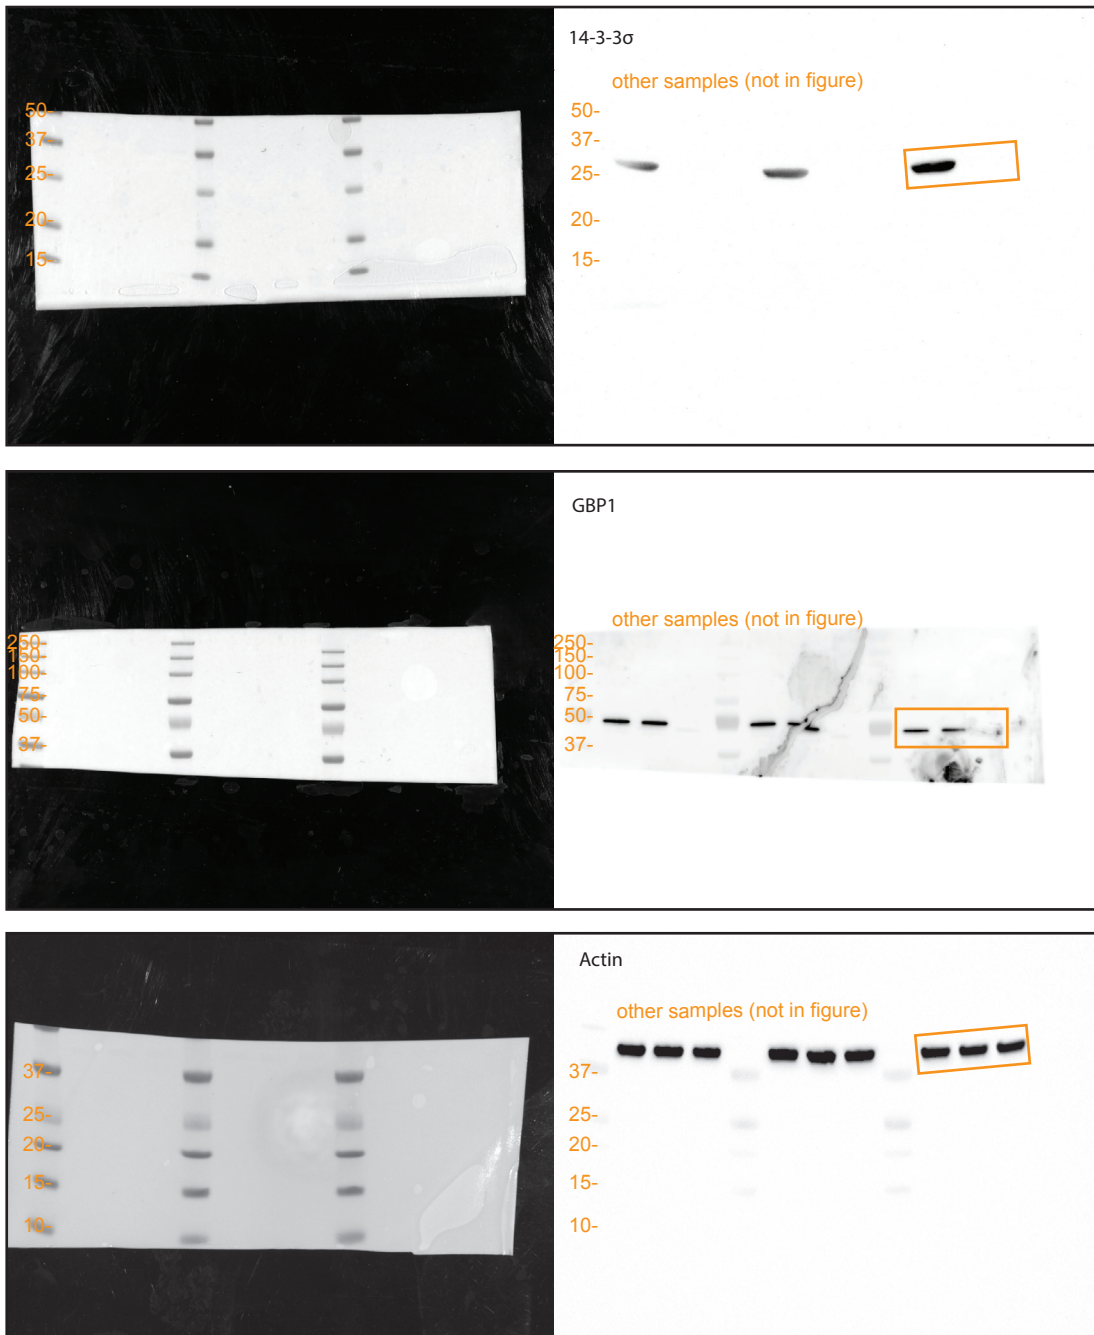



**Fig. S7B**

Figure as in manuscript:

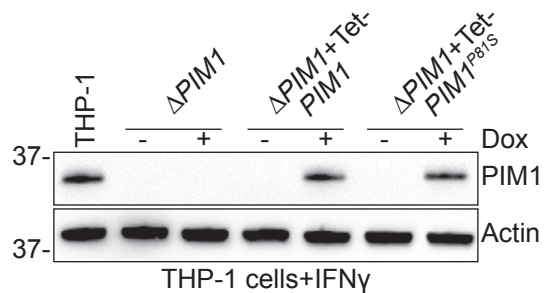

Uncropped gels with indicated size marker and crop area (lane annotation, if excluded from figure):

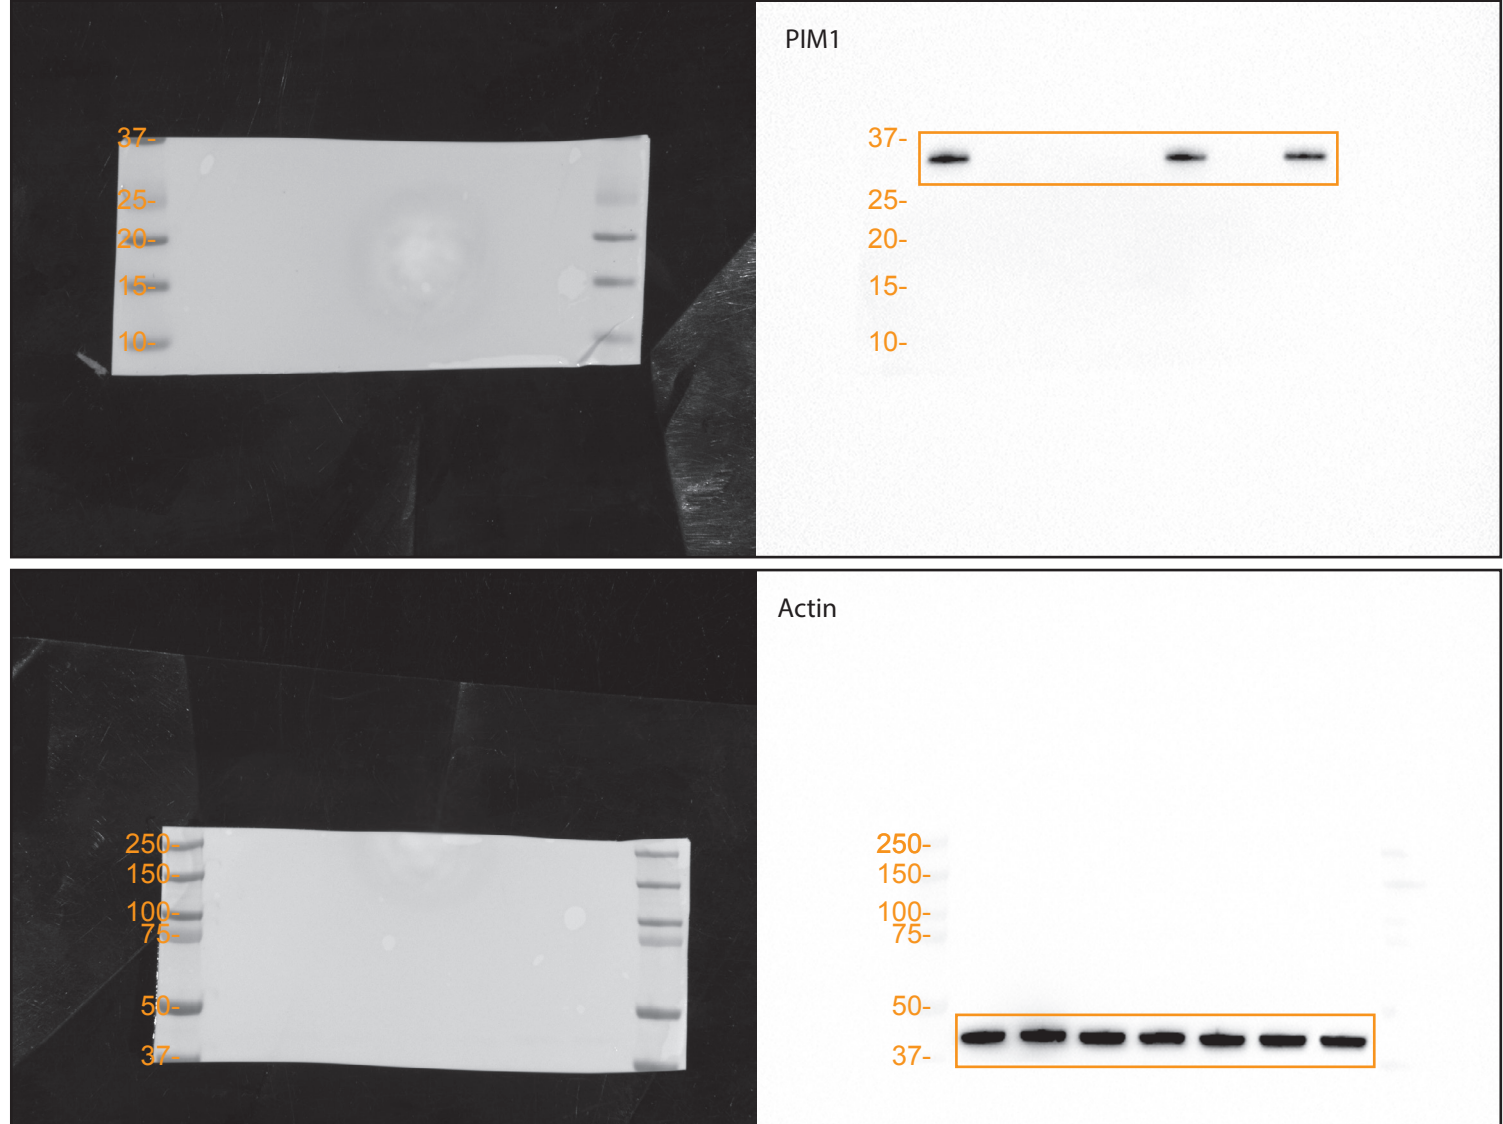

**Fig. S7C**

Figure as in manuscript:

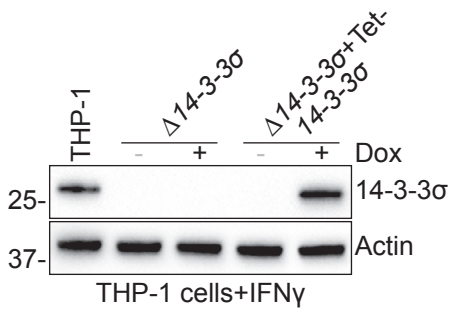

Uncropped gels with indicated size marker and crop area (lane annotation, if excluded from figure):

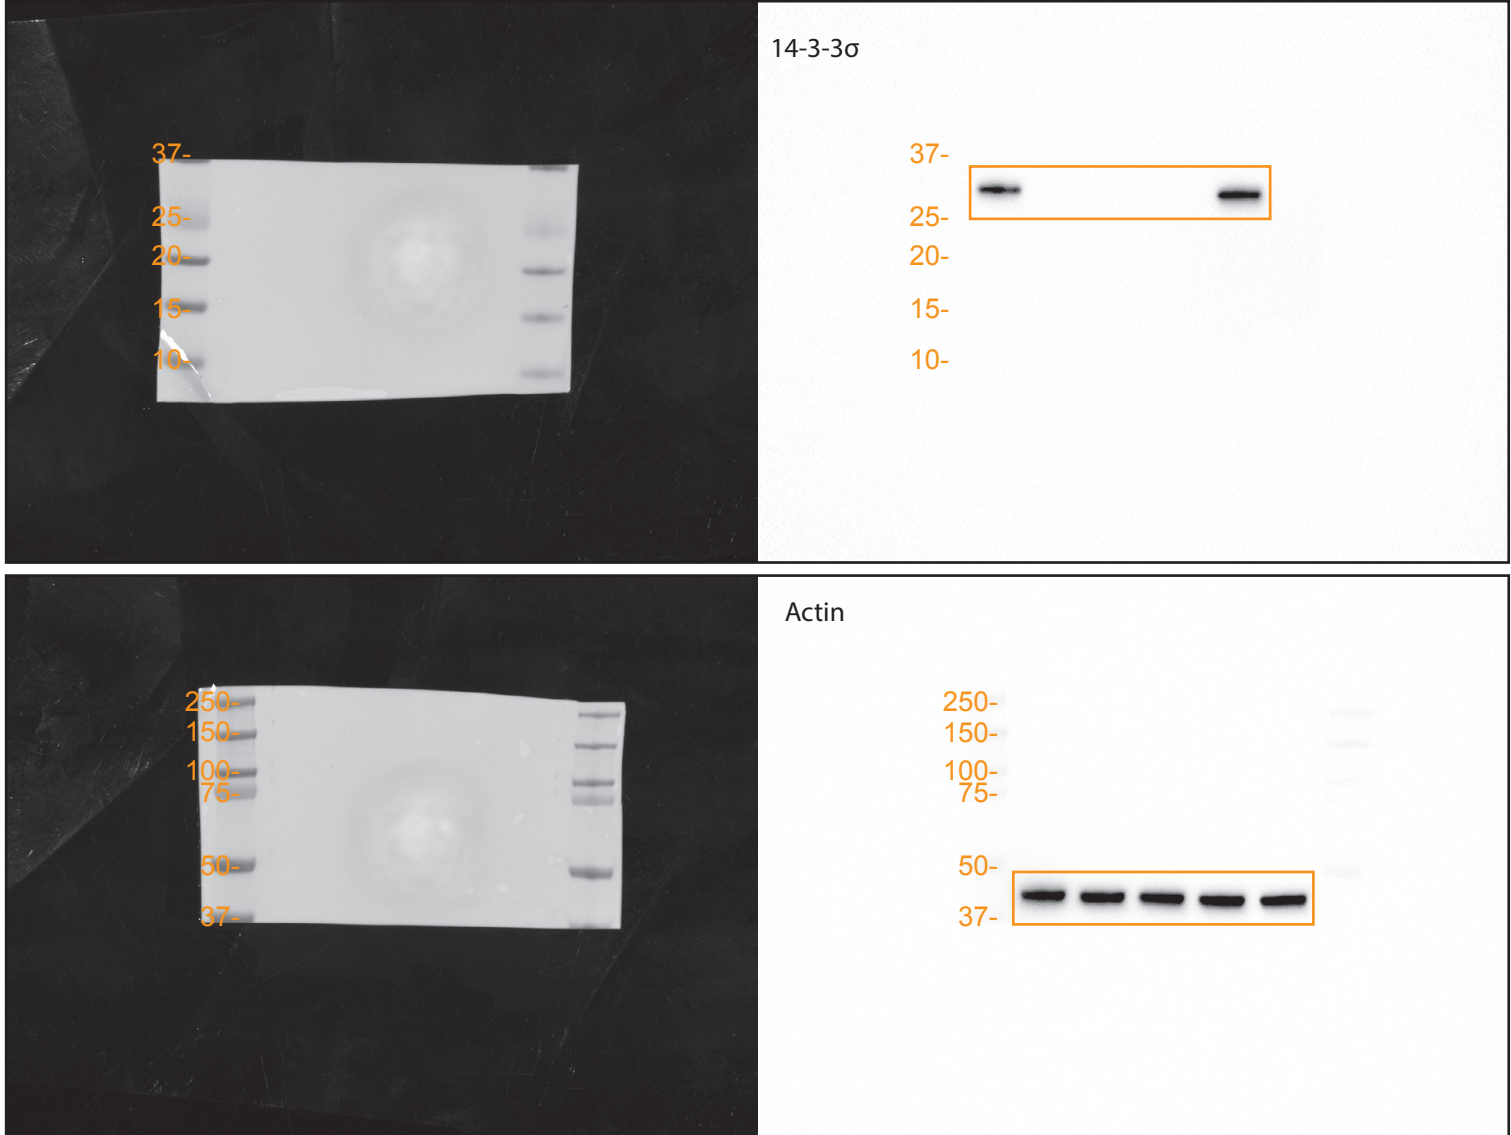

**Fig. S8A**

Figure as in manuscript:

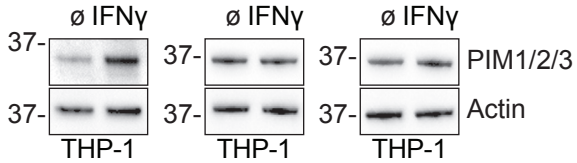

Uncropped gels with indicated size marker and crop area (lane annotation, if excluded from figure):

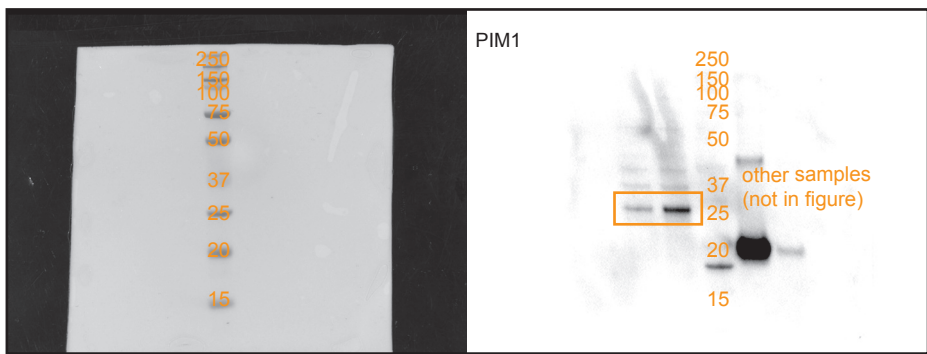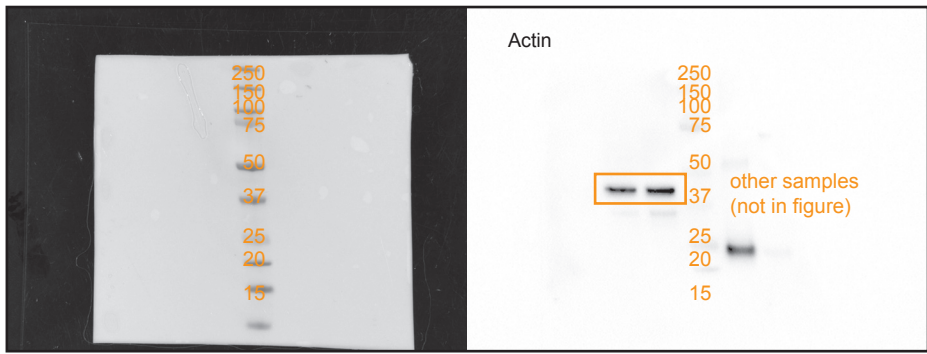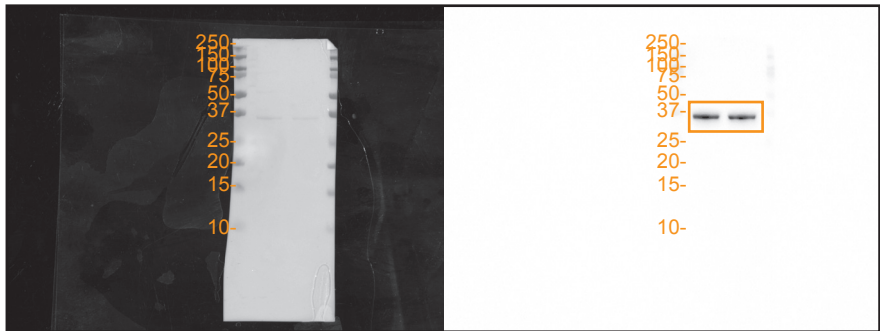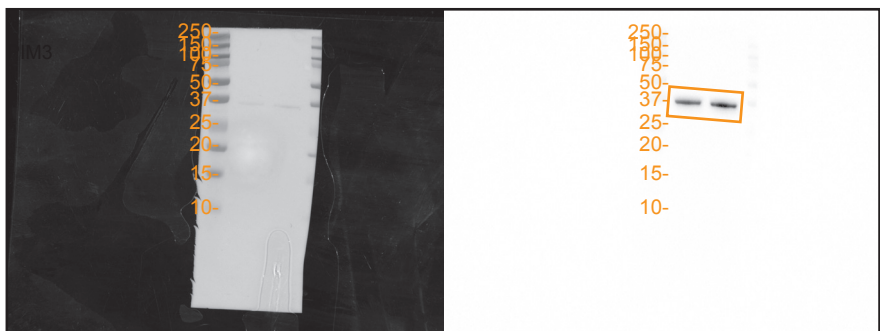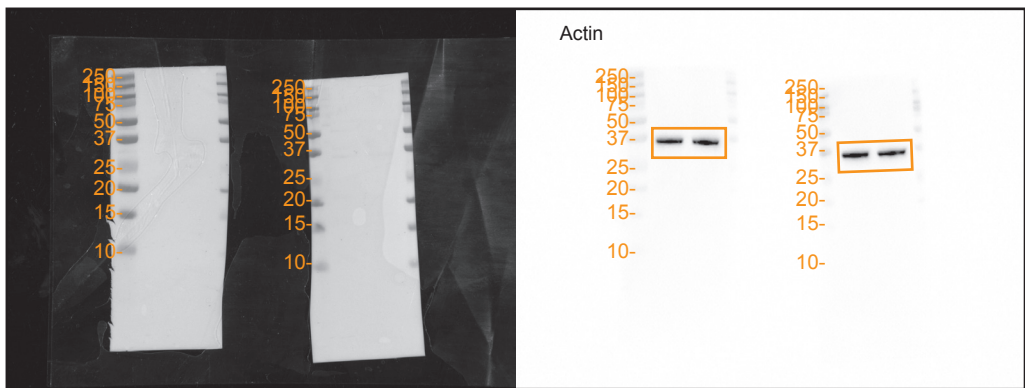



**Fig. S8C**

Figure as in manuscript:

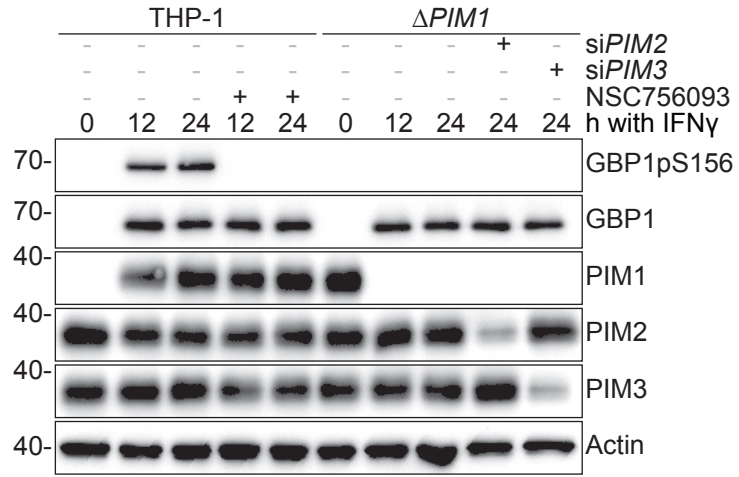

Uncropped gels with indicated size marker and crop area (lane annotation, if excluded from figure):

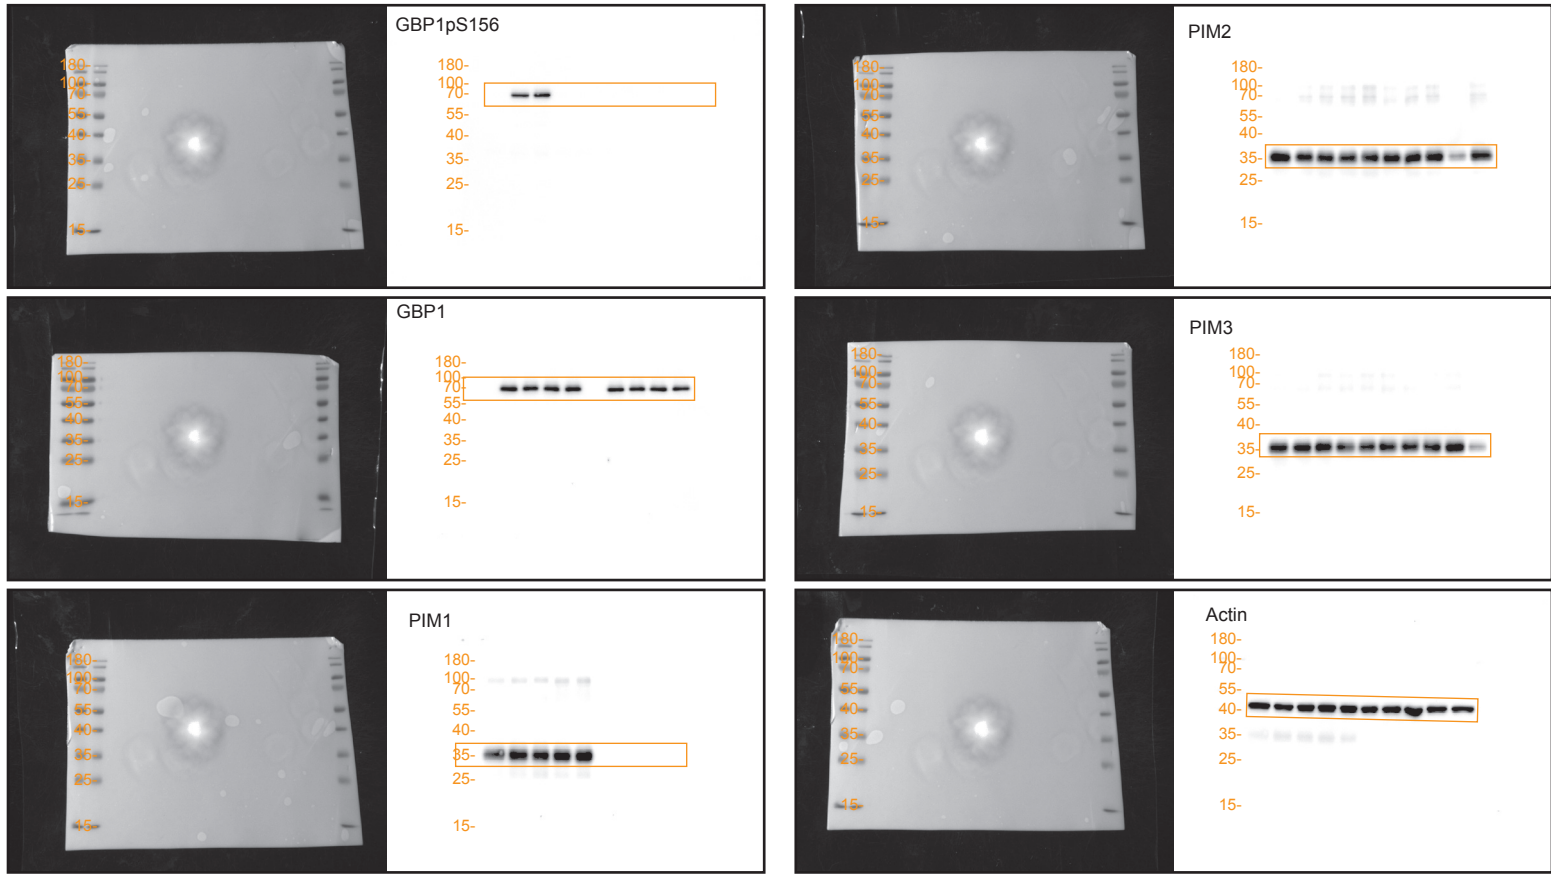

**Fig. S8D**

Figure as in manuscript:

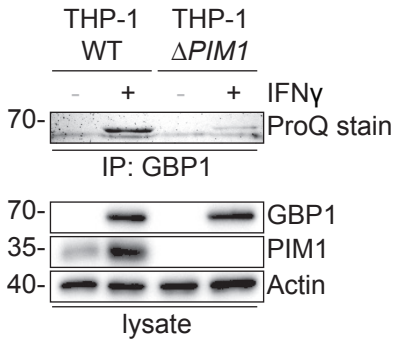

Uncropped gels with indicated size marker and crop area (lane annotation, if excluded from figure):

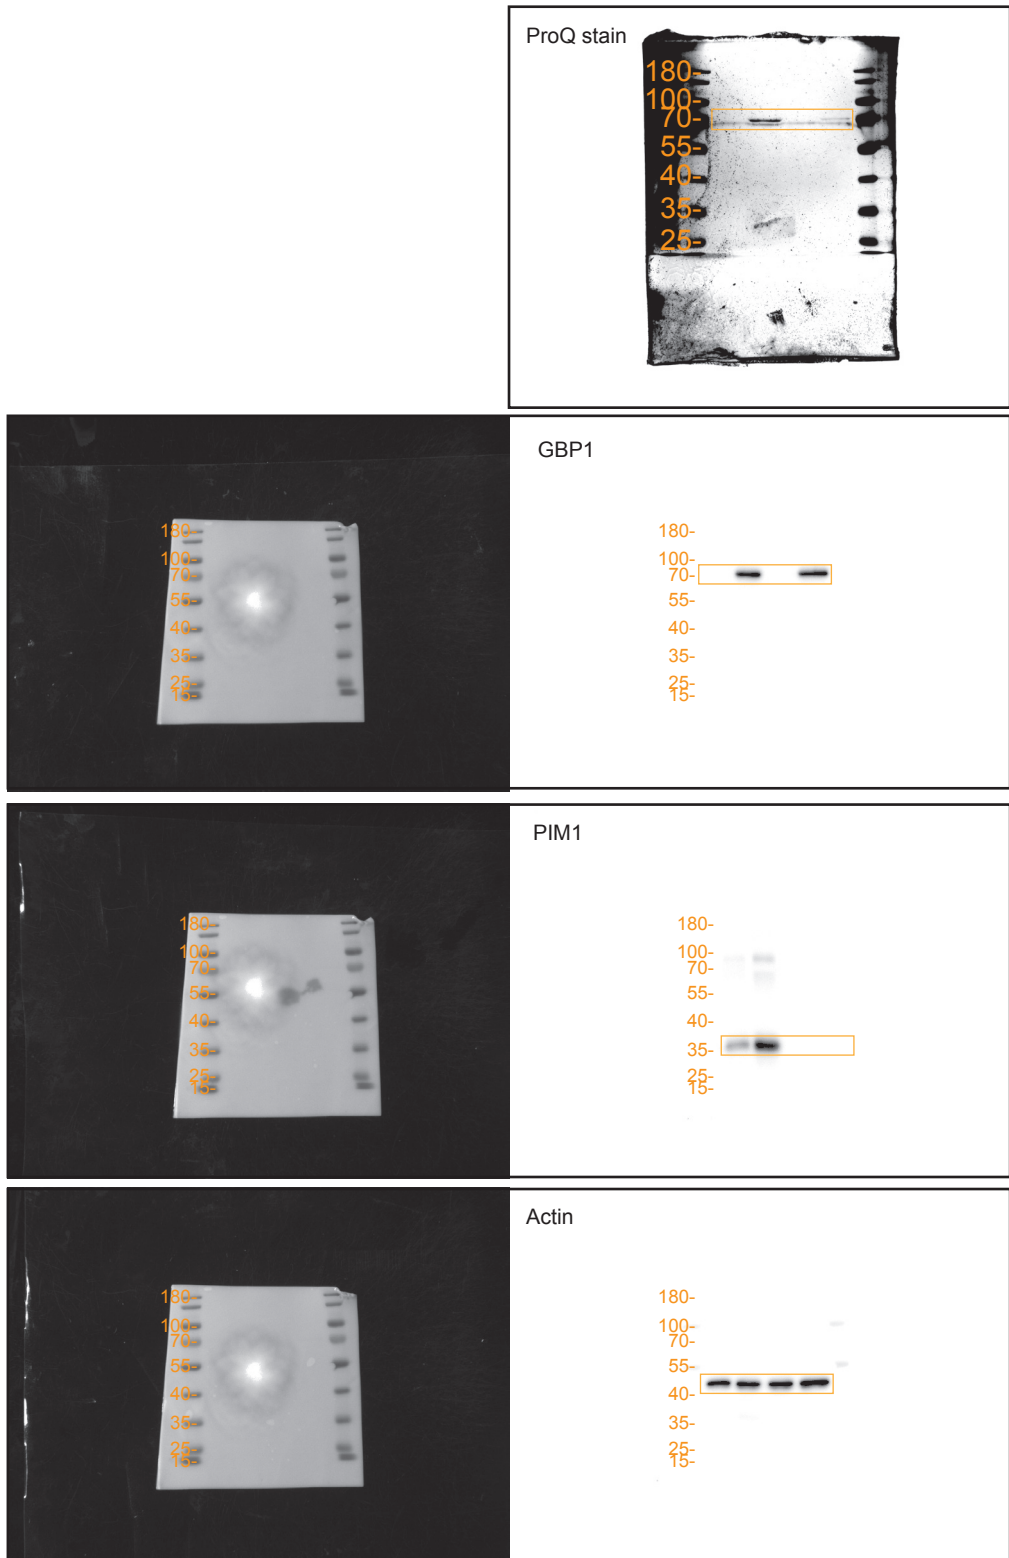





**Fig. S9B**

Figure as in manuscript:

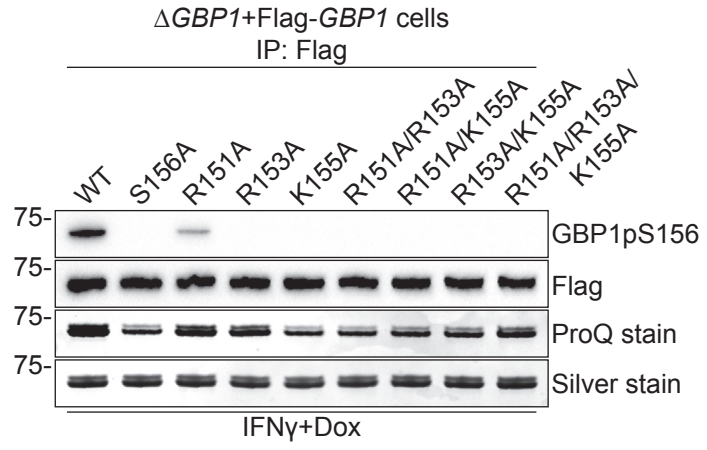

Uncropped gels with indicated size marker and crop area (lane annotation, if excluded from figure):

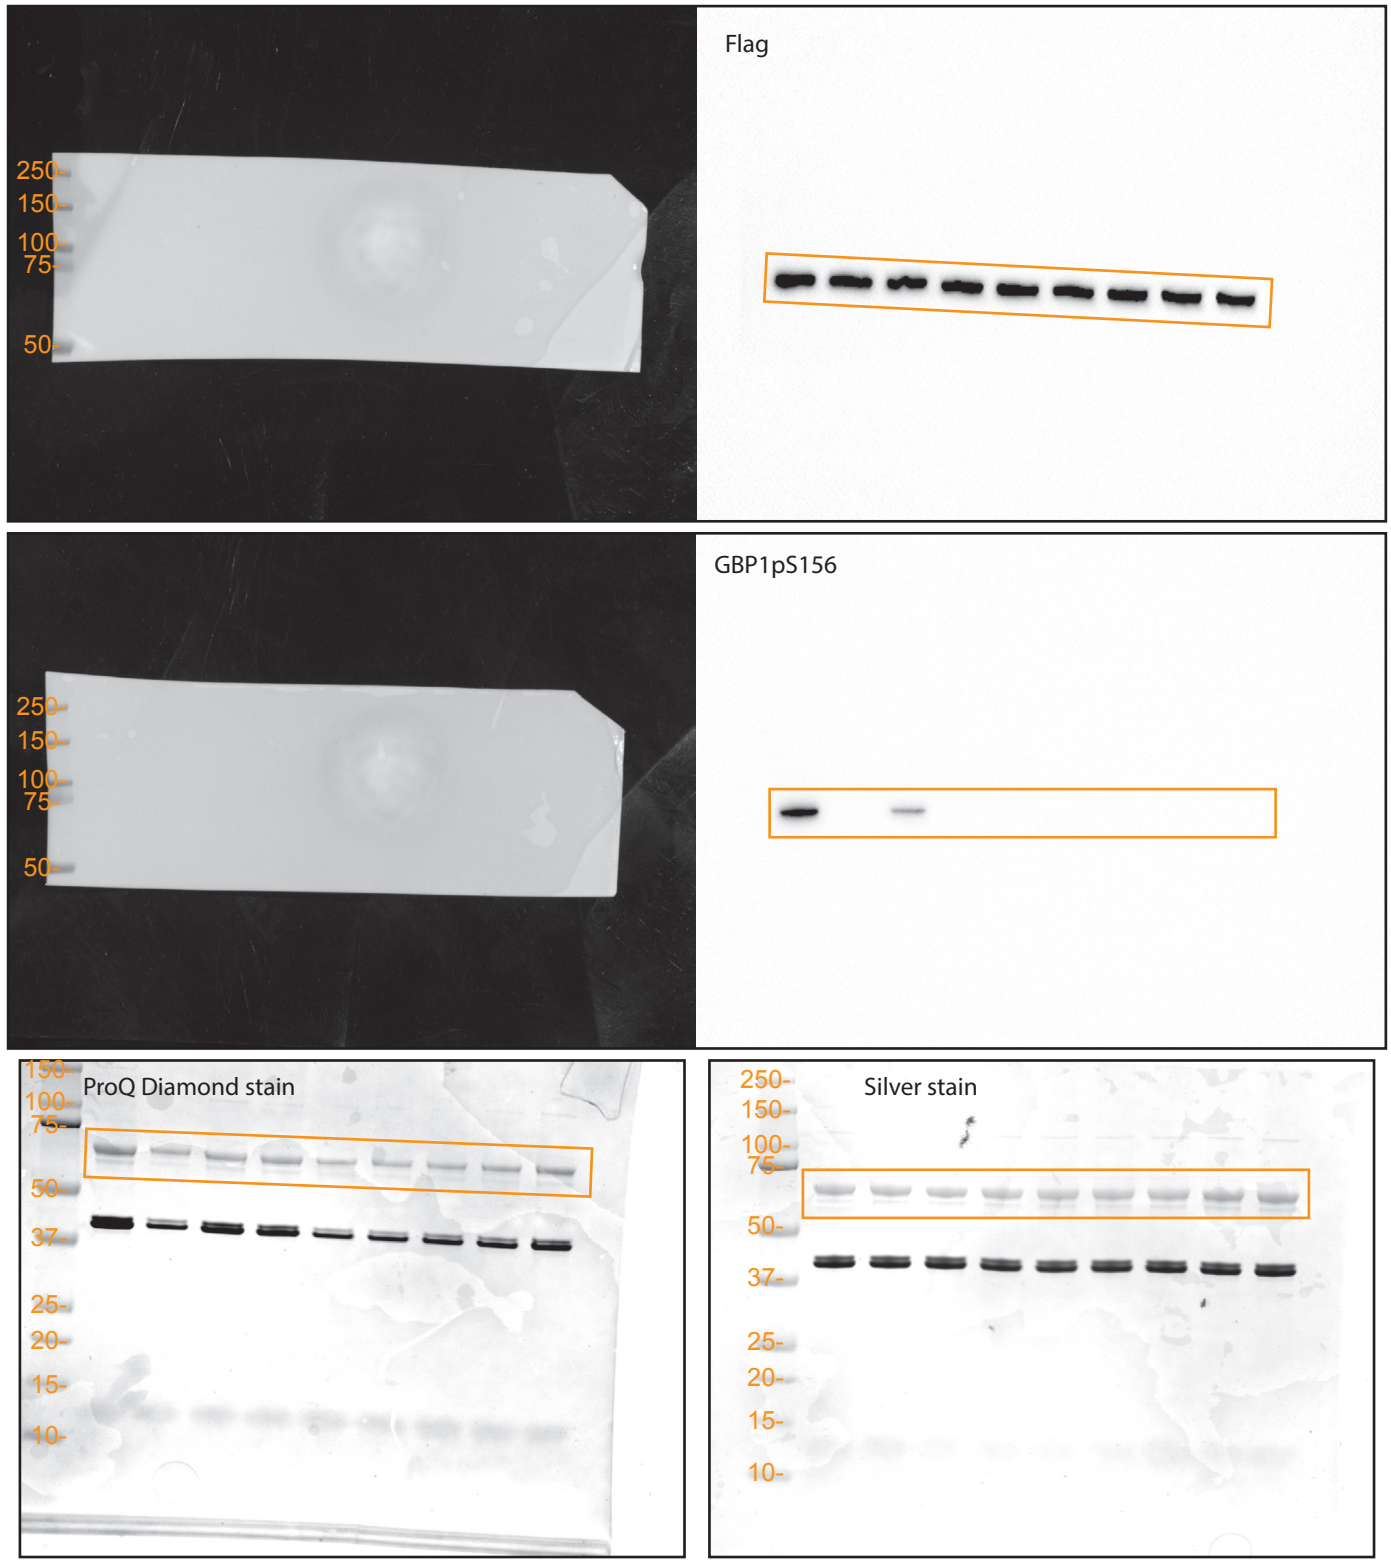

**Fig. S10B - part 1**

Figure as in manuscript:

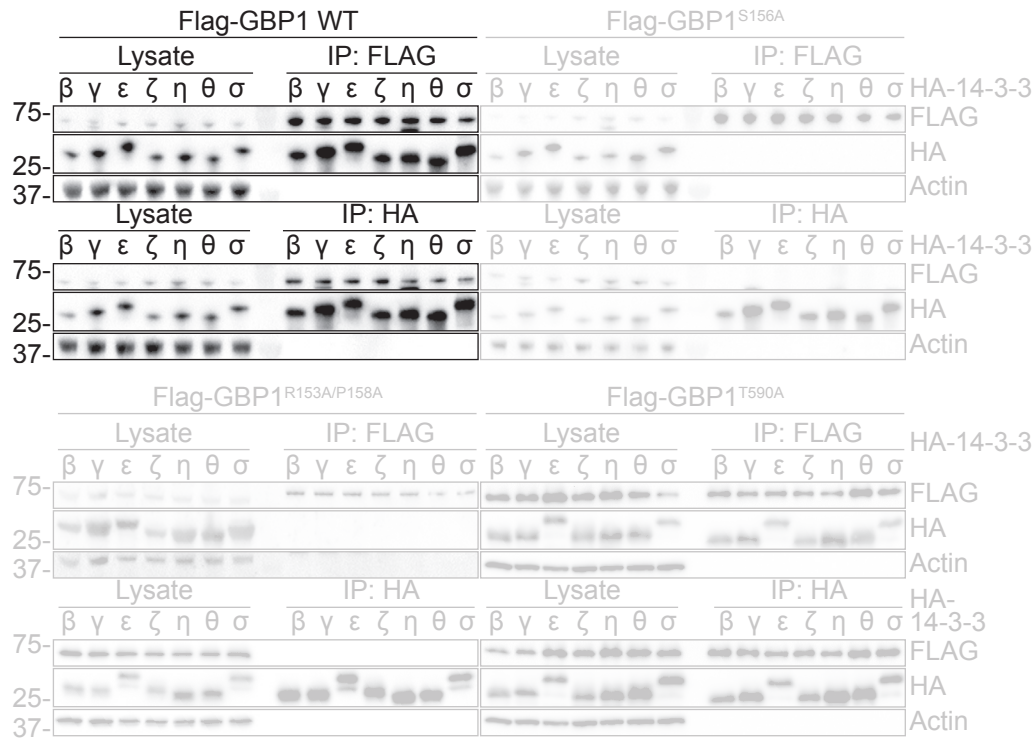

Uncropped gels with indicated size marker and crop area (lane annotation, if excluded from figure):

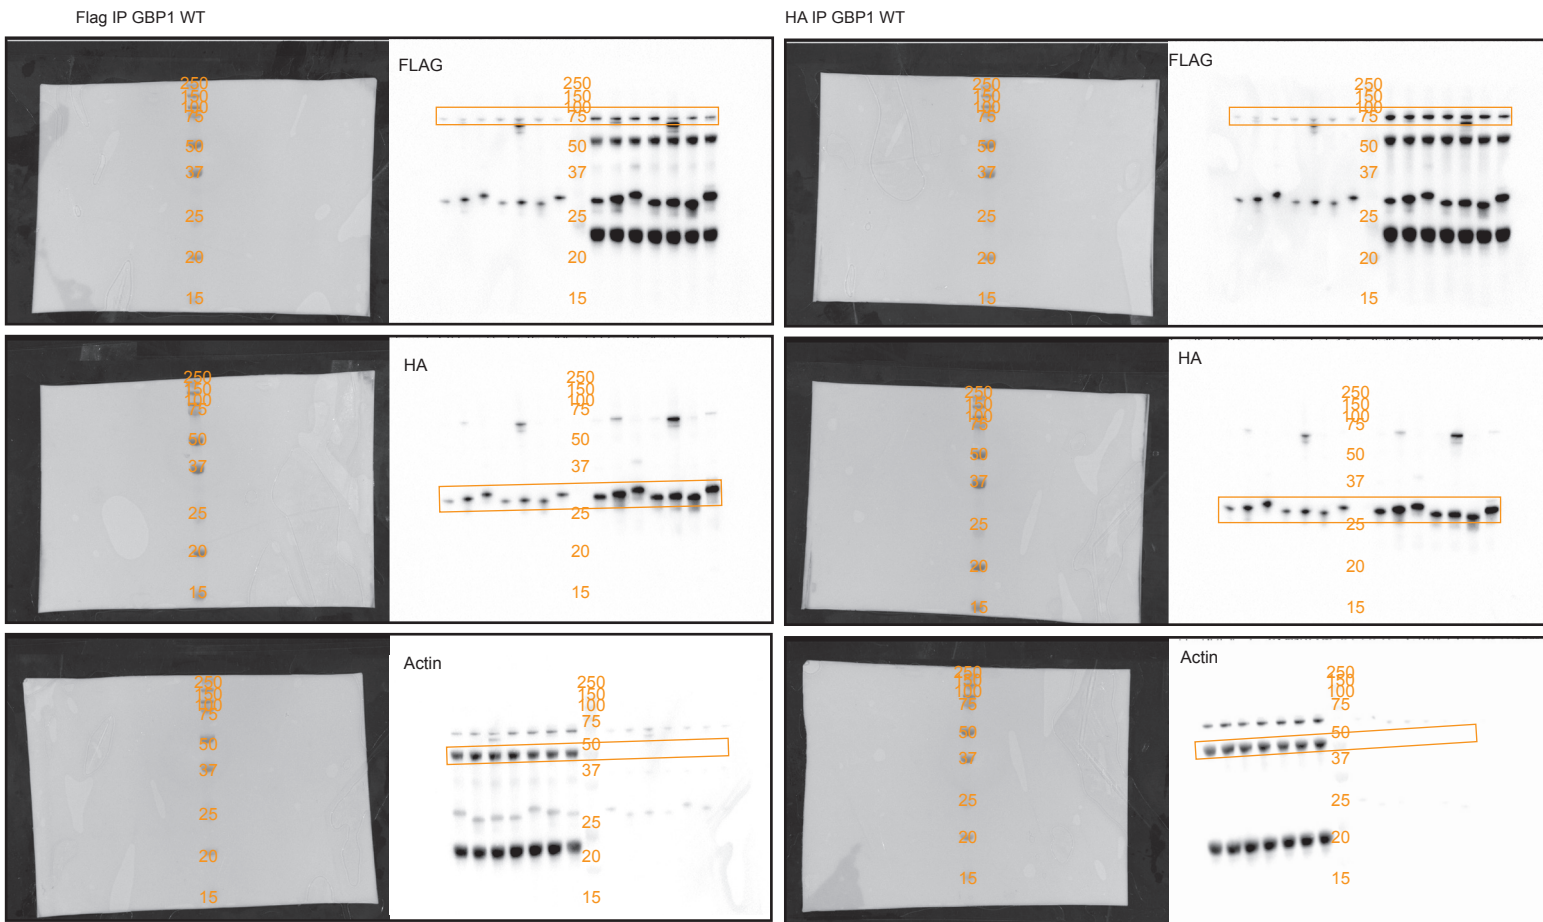



**Fig. S10B - part 2**

Figure as in manuscript:

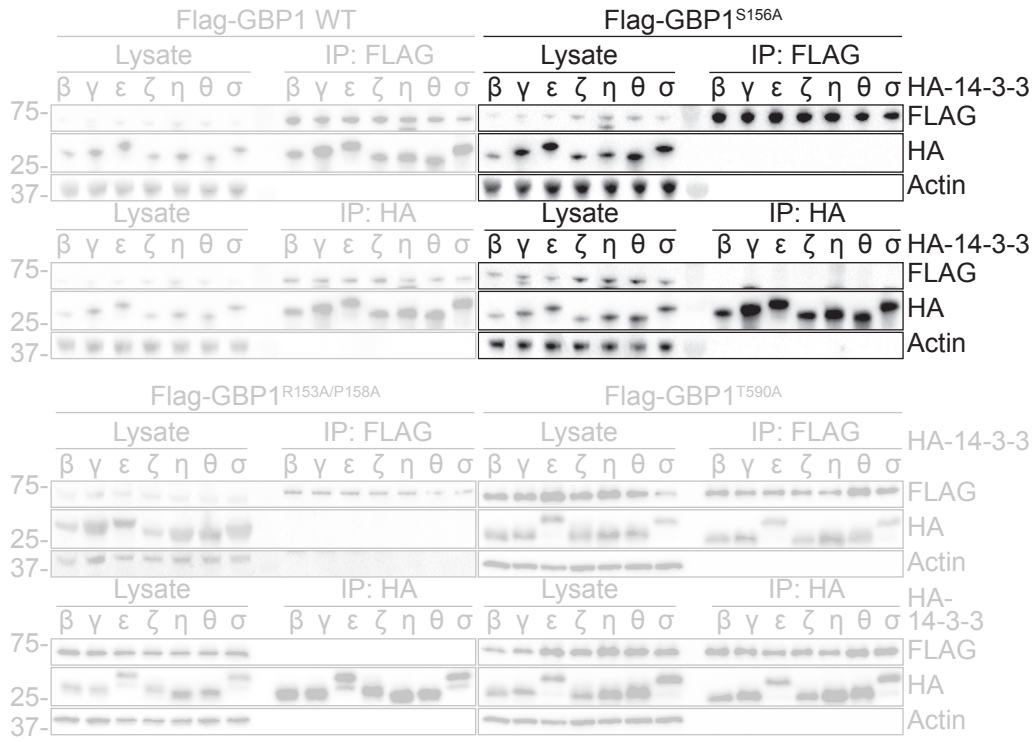

Uncropped gels with indicated size marker and crop area (lane annotation, if excluded from figure):

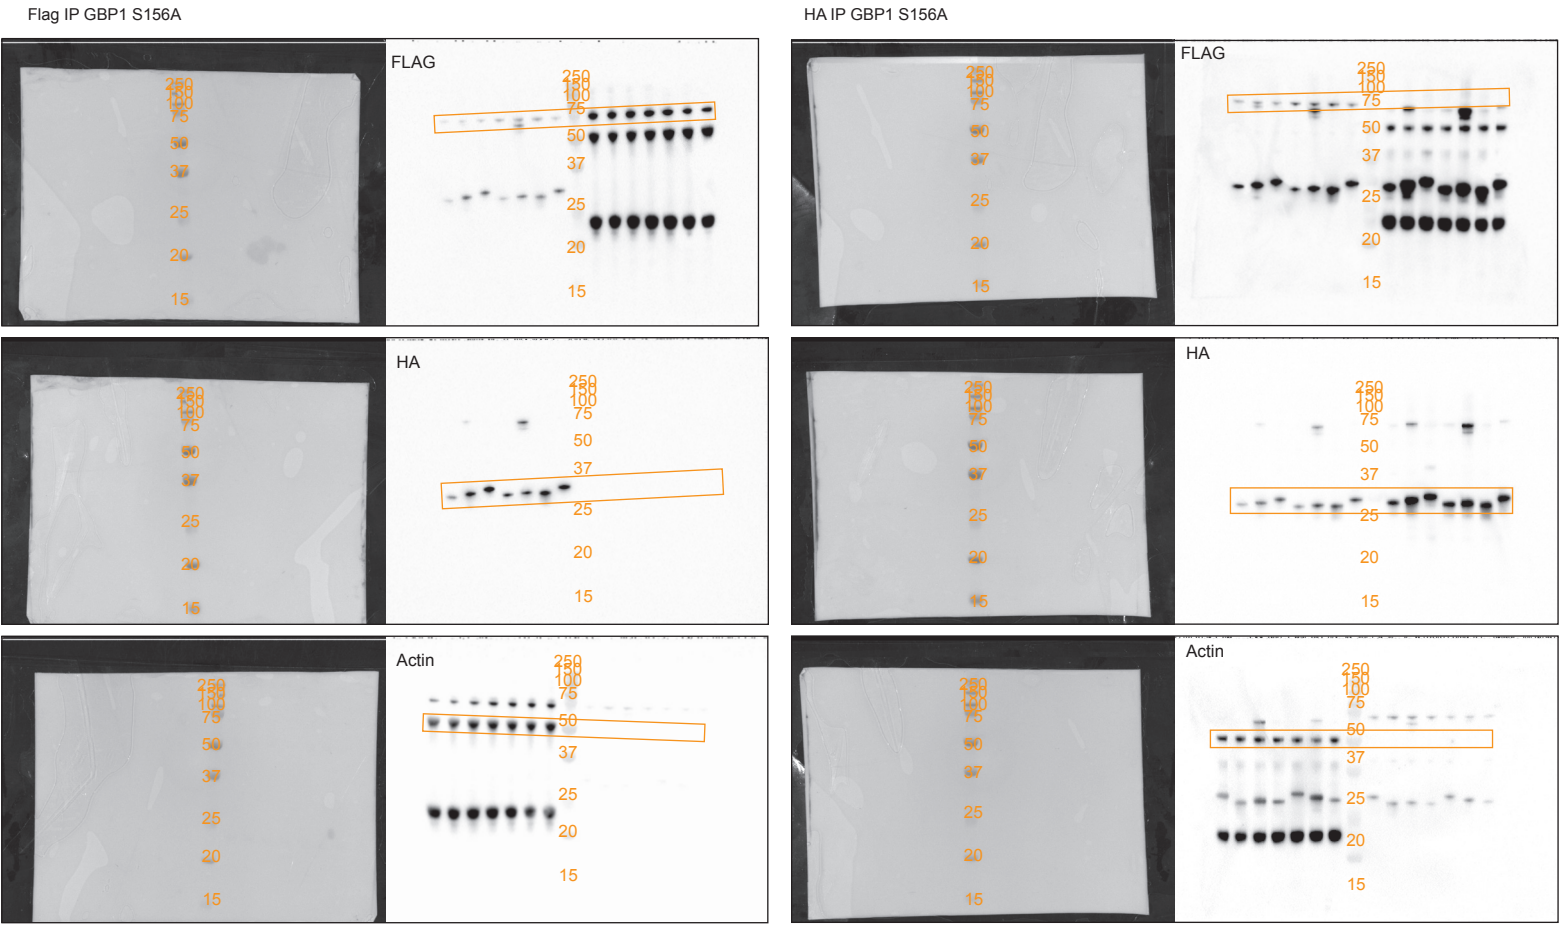



**Fig. S10B - part 3**

Figure as in manuscript:

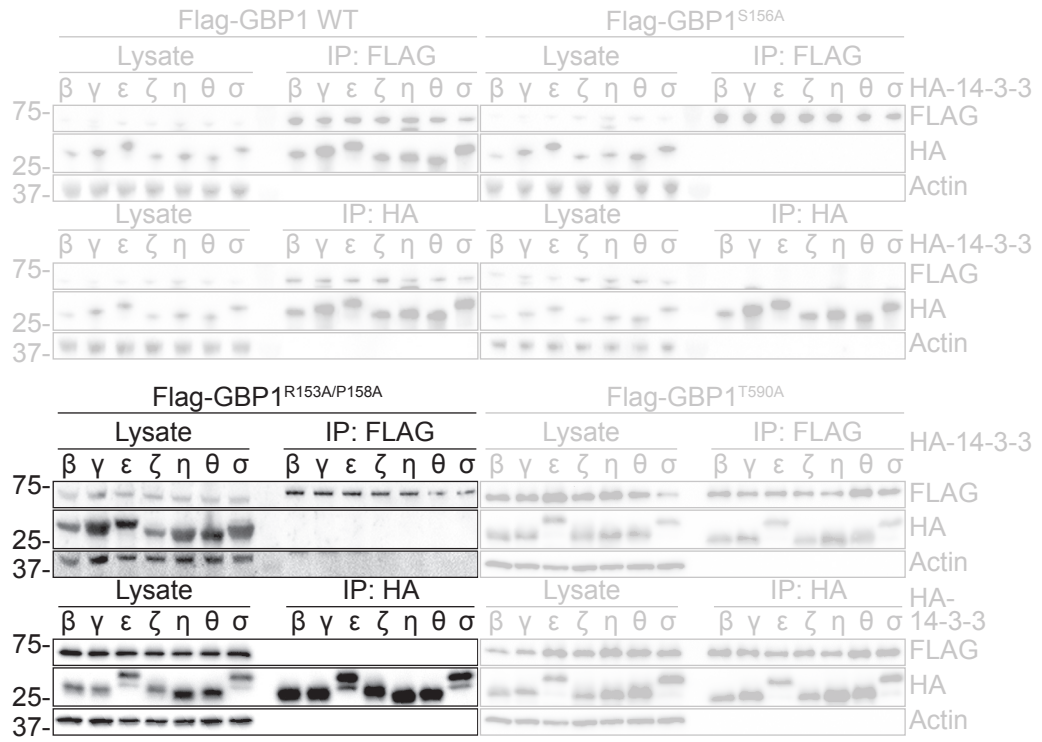

Uncropped gels with indicated size marker and crop area (lane annotation, if excluded from figure):

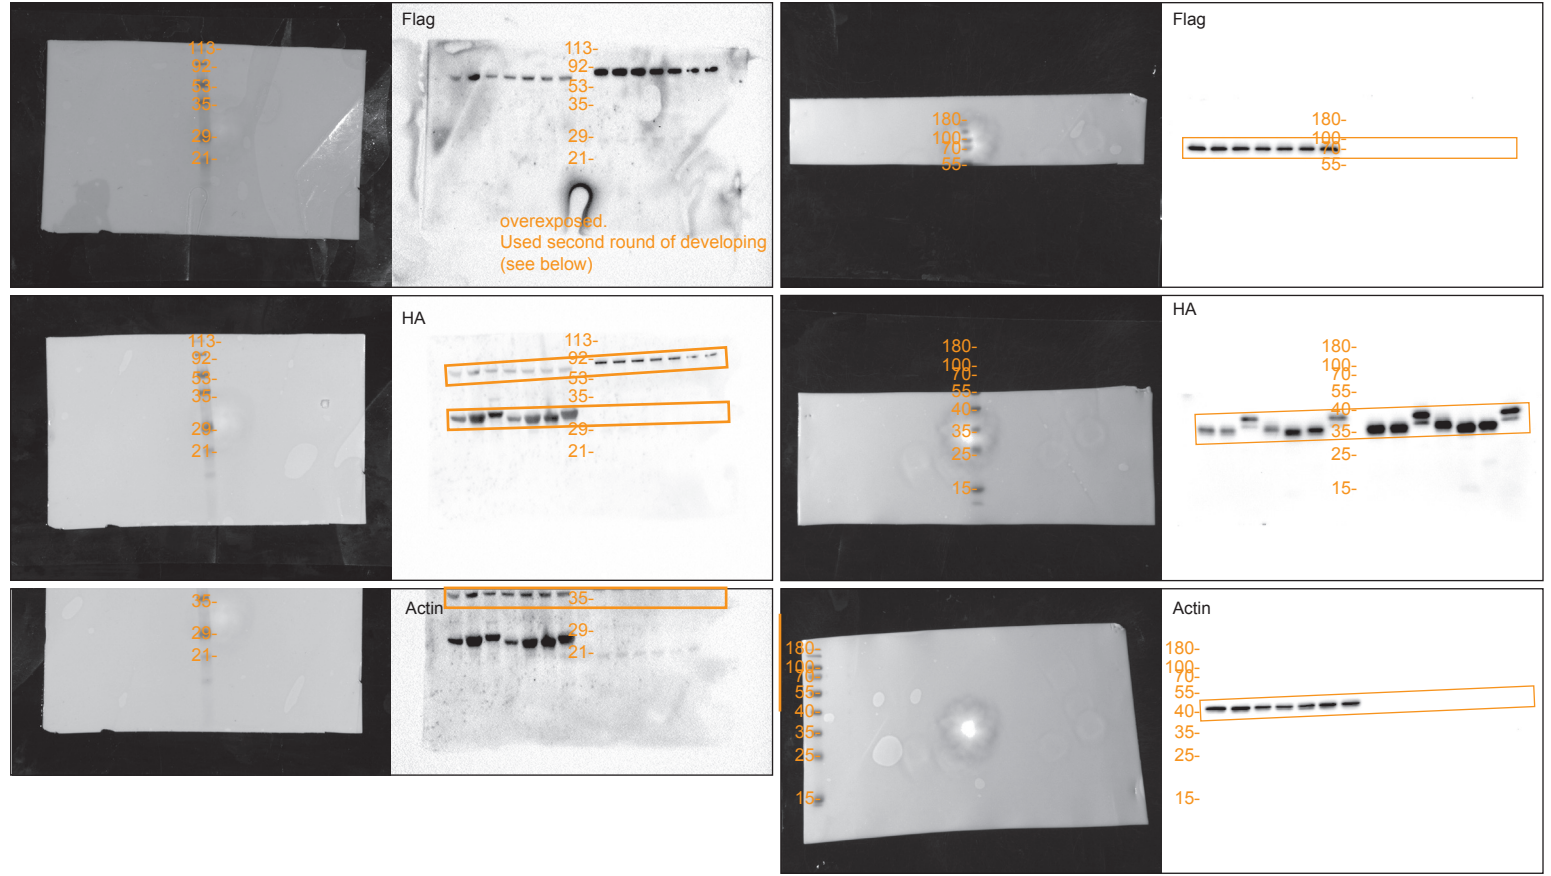

**Fig. S10B - part 4**

Figure as in manuscript:

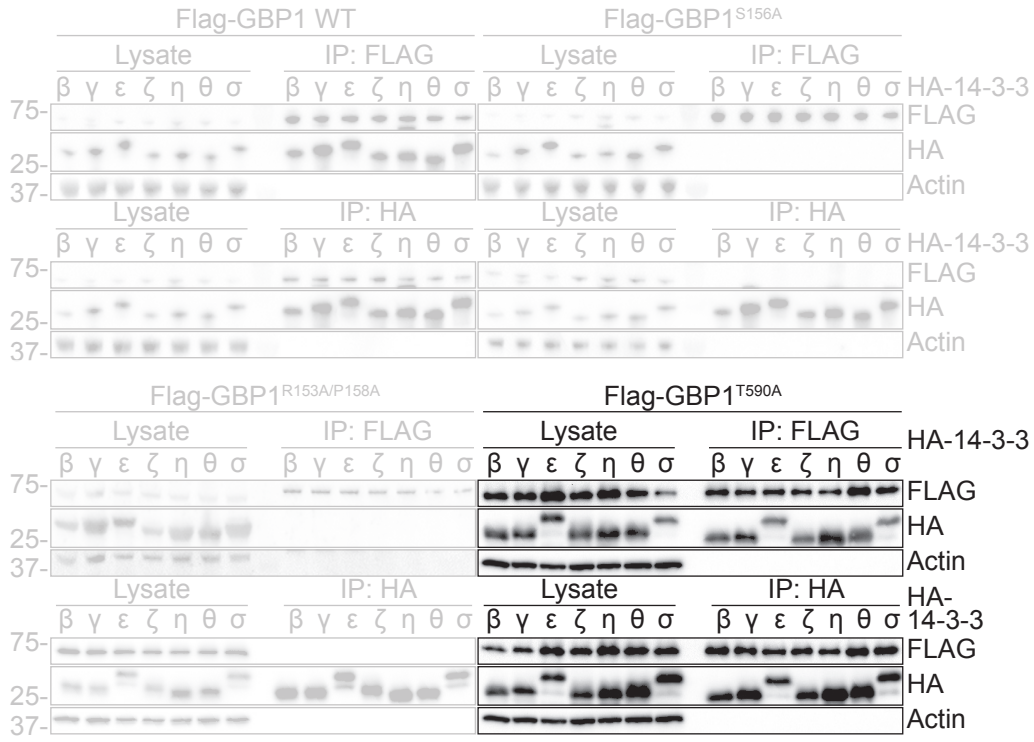

Uncropped gels with indicated size marker and crop area (lane annotation, if excluded from figure):

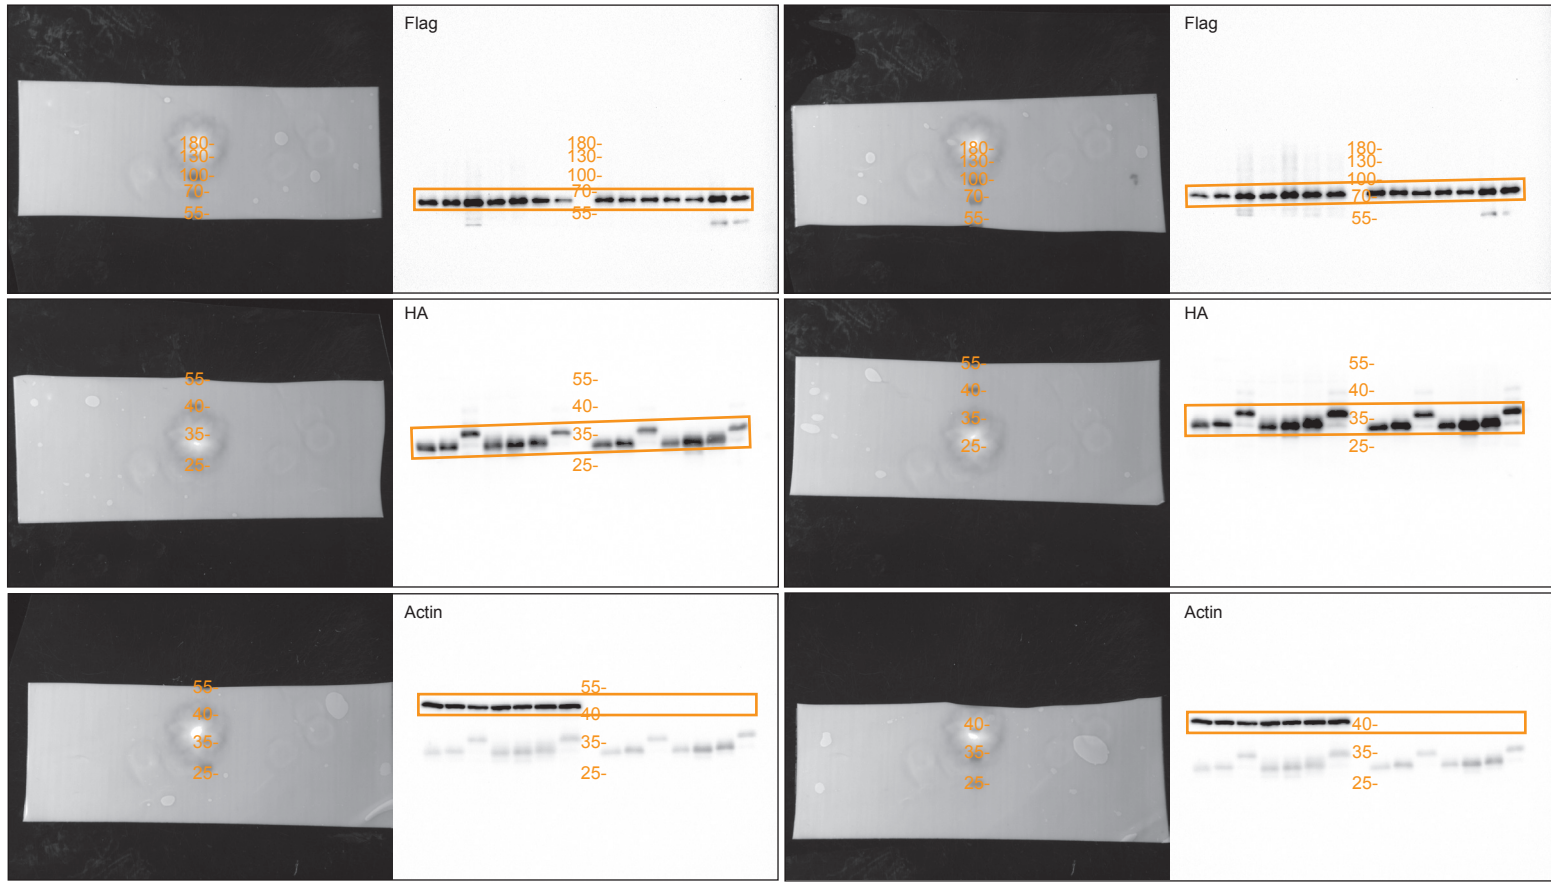



**Fig. S11 - part 1**

Figure as in manuscript:

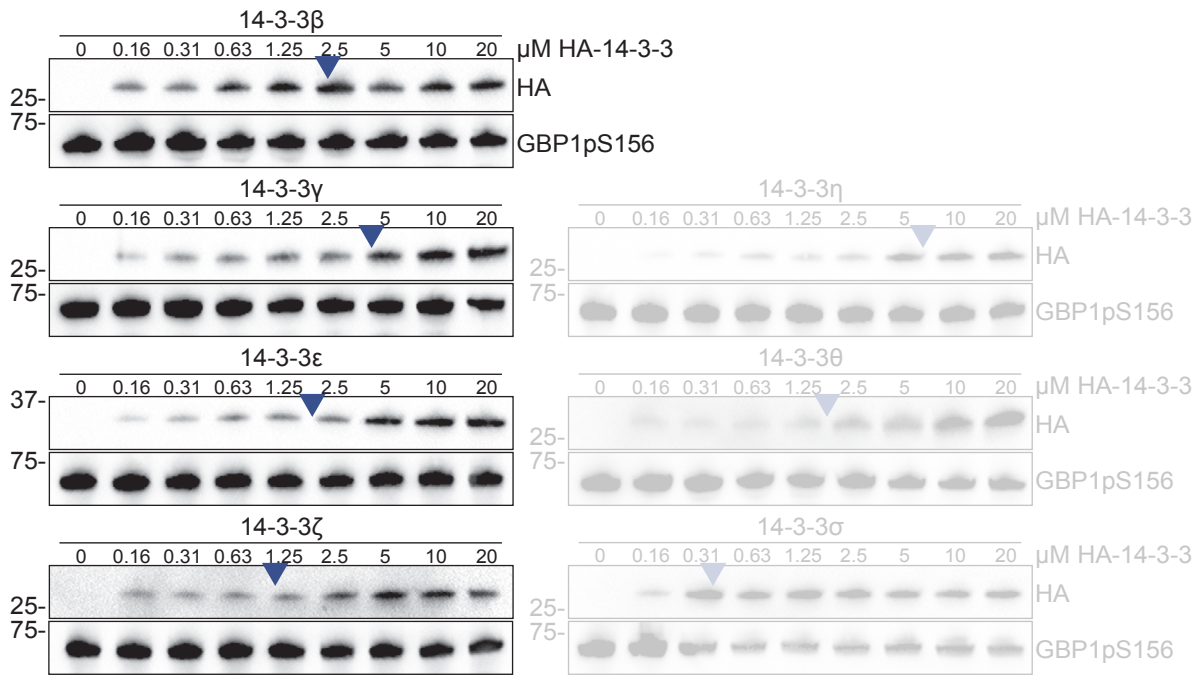

Uncropped gels with indicated size marker and crop area (lane annotation, if excluded from figure):

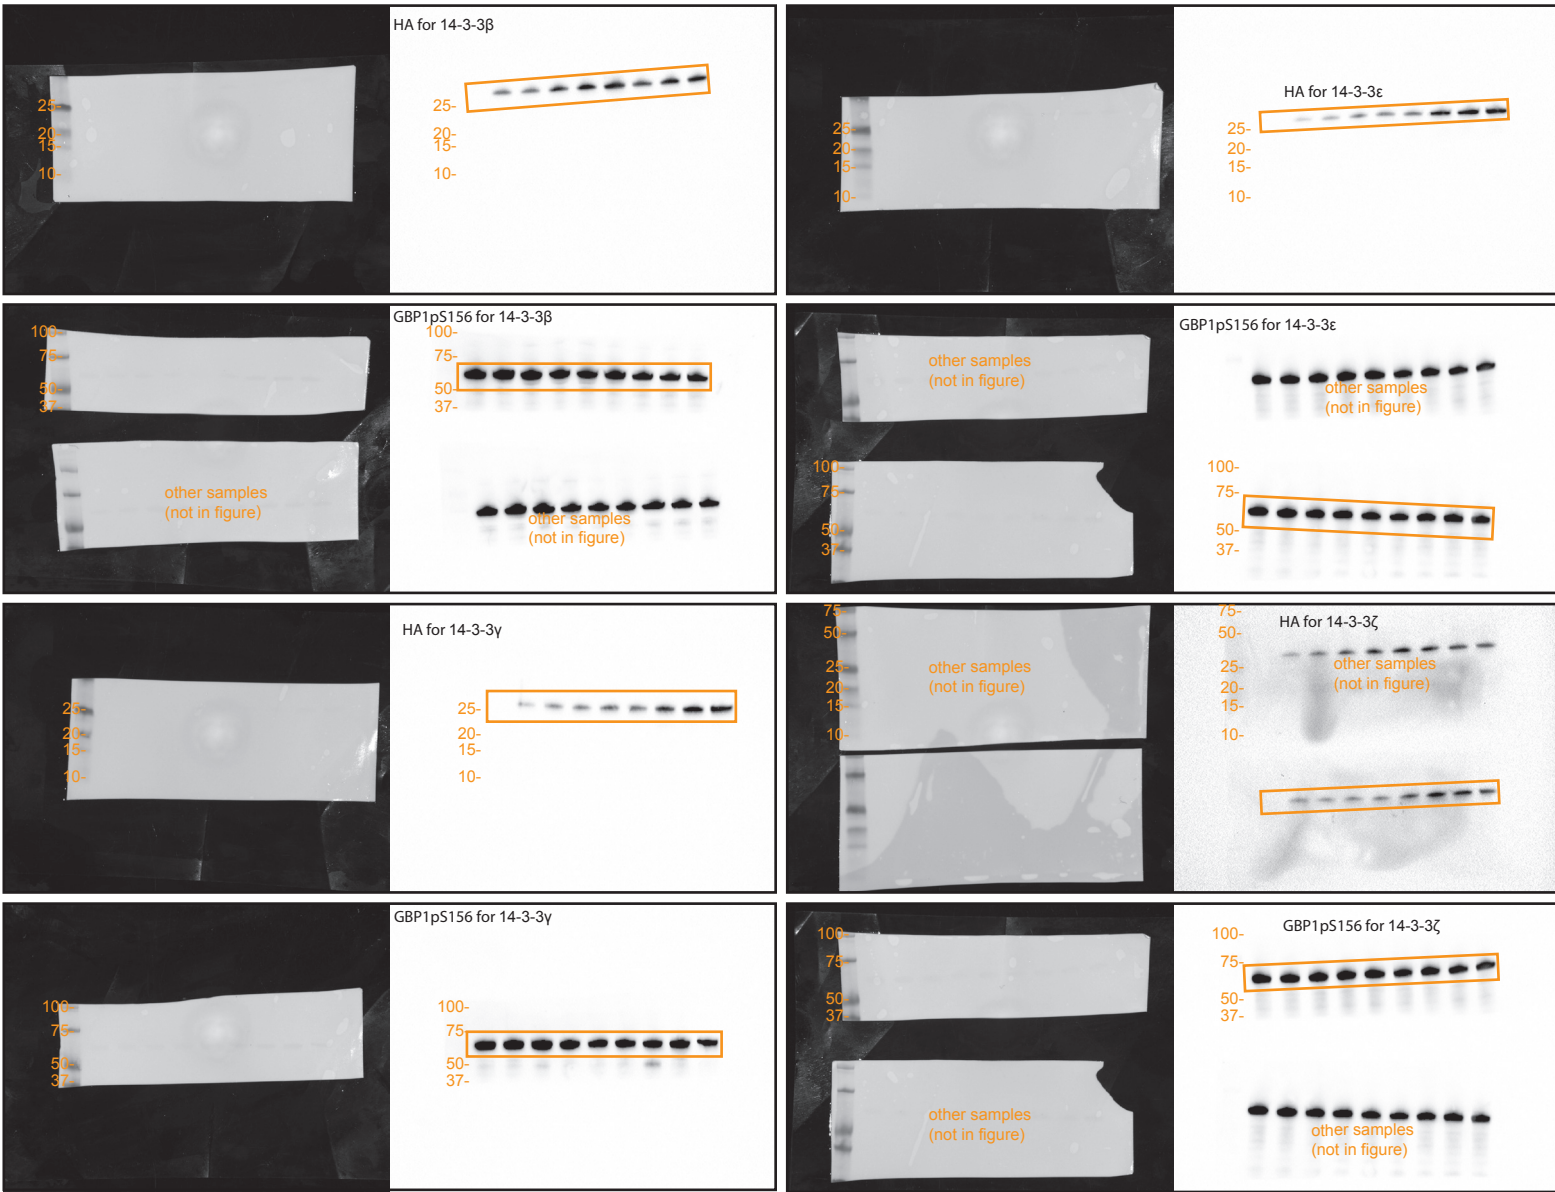



**Fig. S11 - part 2**

Figure as in manuscript:

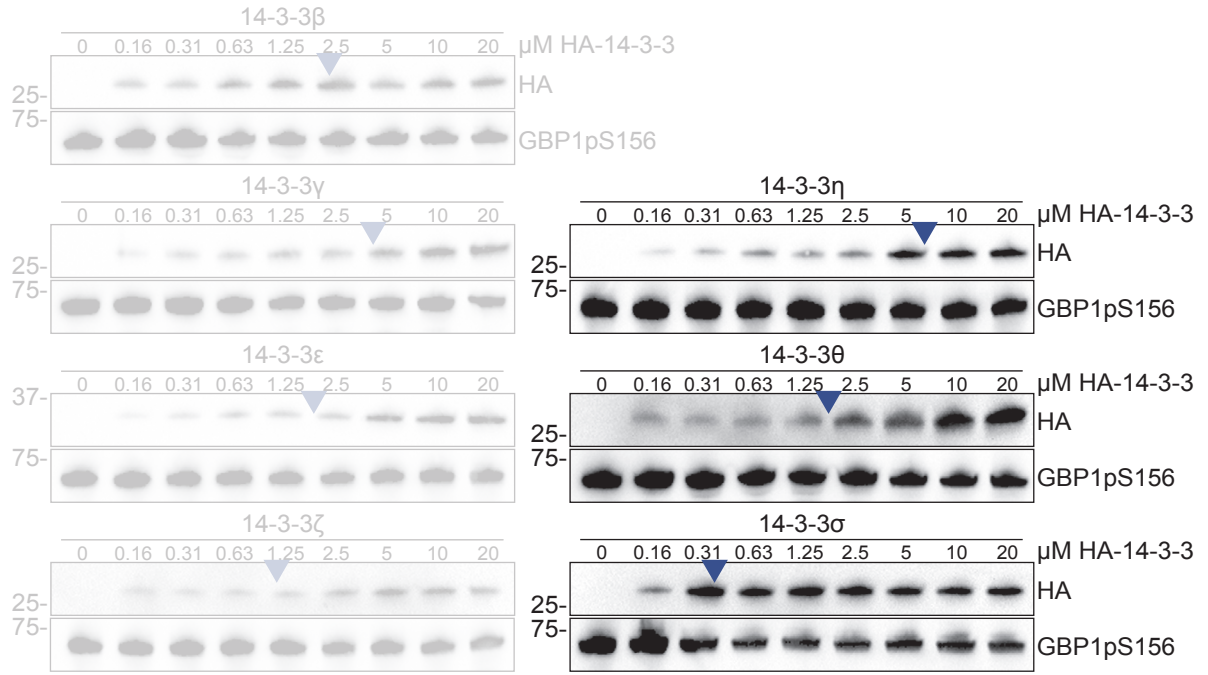

Uncropped gels with indicated size marker and crop area (lane annotation, if excluded from figure):

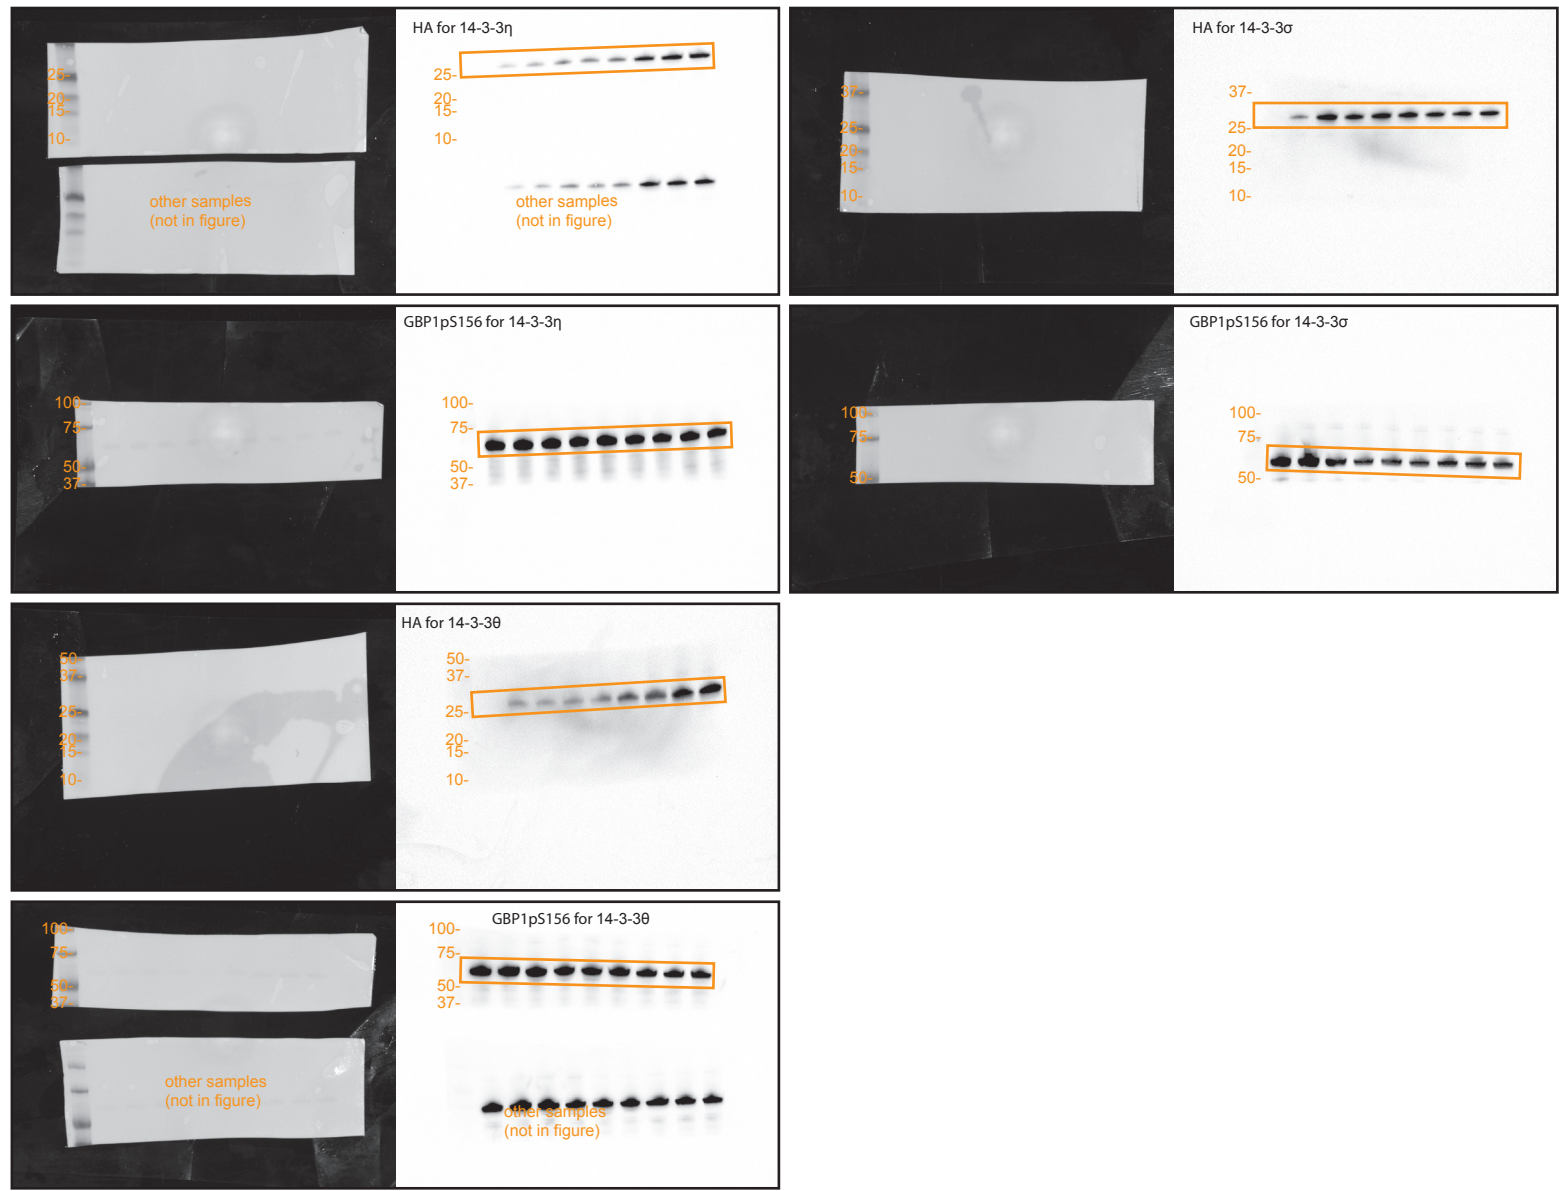

**Fig. S12A**

Figure as in manuscript:

MBP-8xHis-3C-GBP1 (BL21)

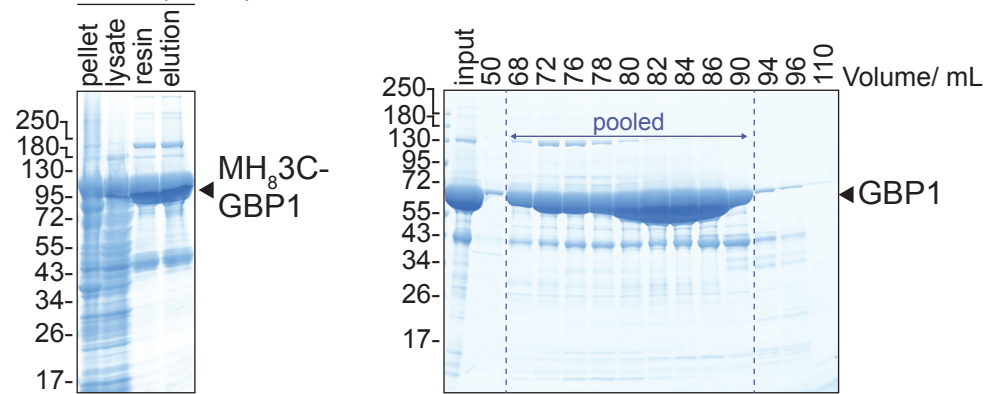

Uncropped gels with indicated size marker and crop area (lane annotation, if excluded from figure):

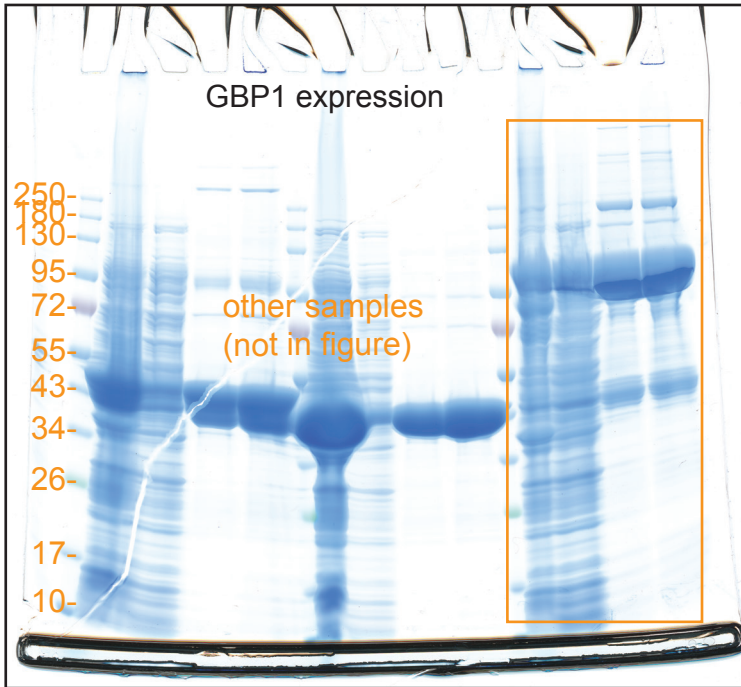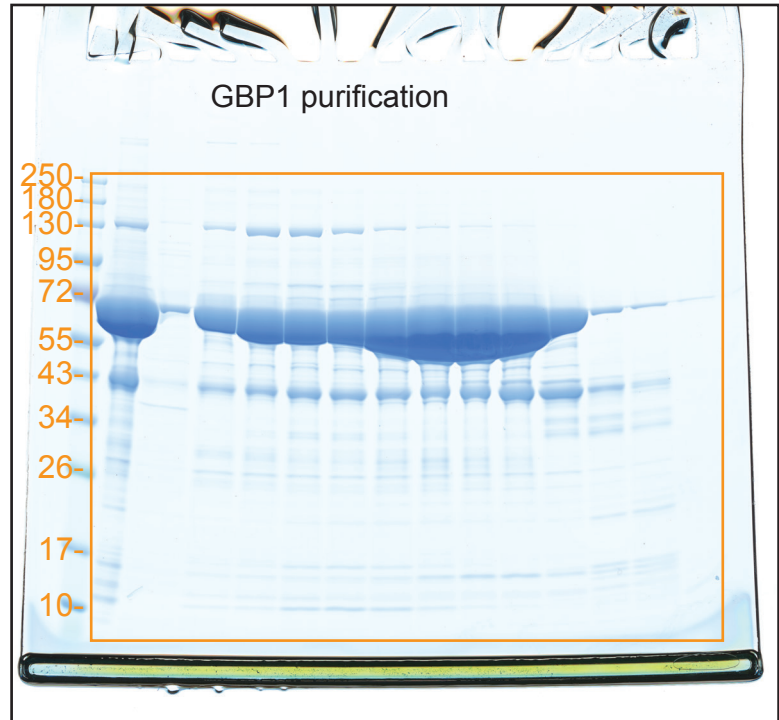

**Fig. S12B**

6xHis-3C-  
14-3-3 $\sigma$  (BL21)

Figure as in manuscript:

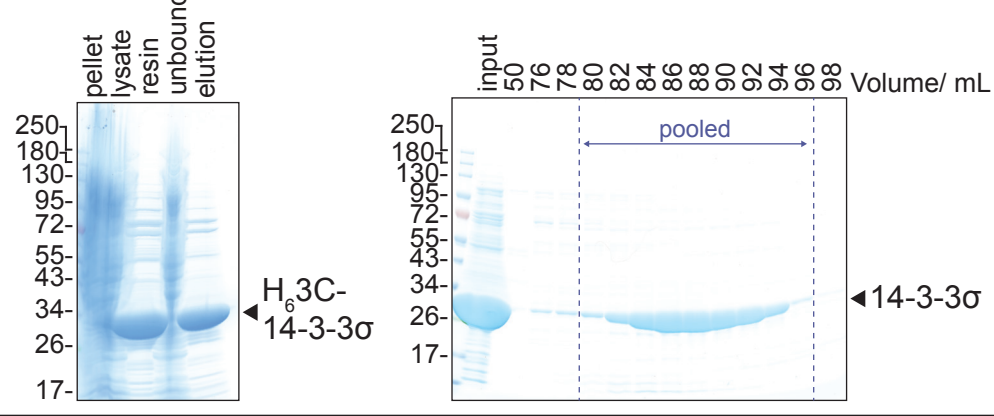

Uncropped gels with indicated size marker and crop area (lane annotation, if excluded from figure):

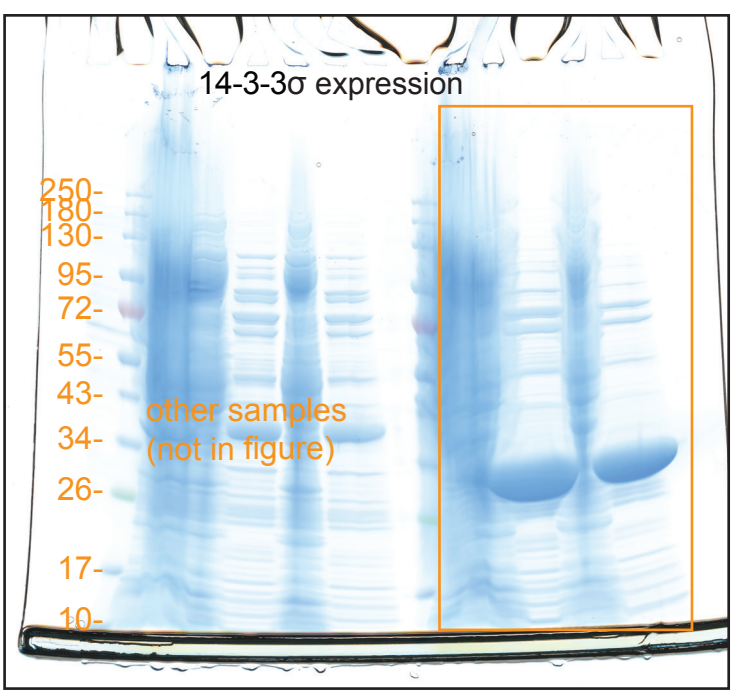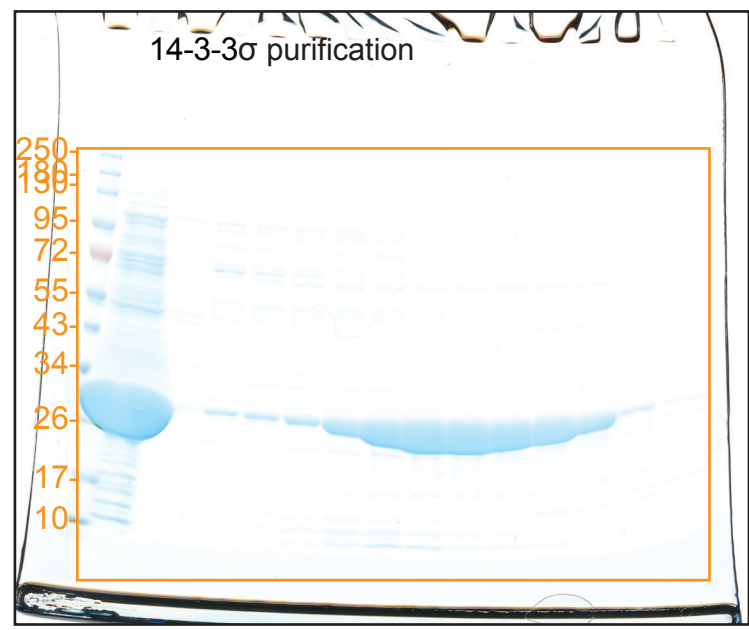



**Fig. S12C**

Figure as in manuscript:

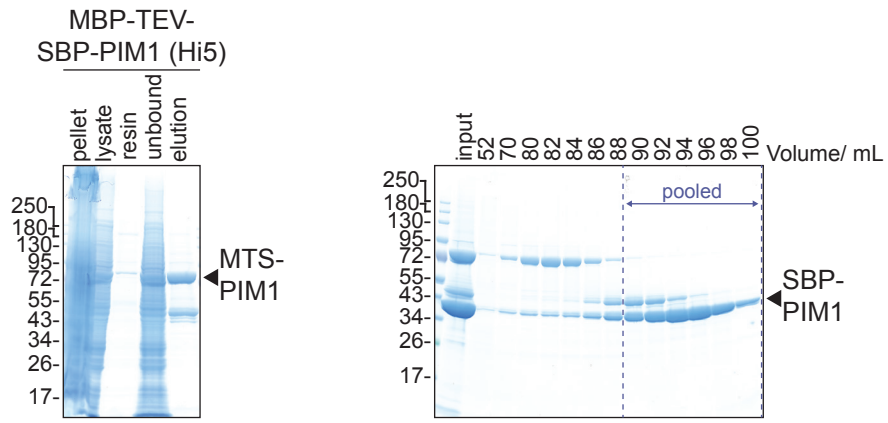

Uncropped gels with indicated size marker and crop area (lane annotation, if excluded from figure):

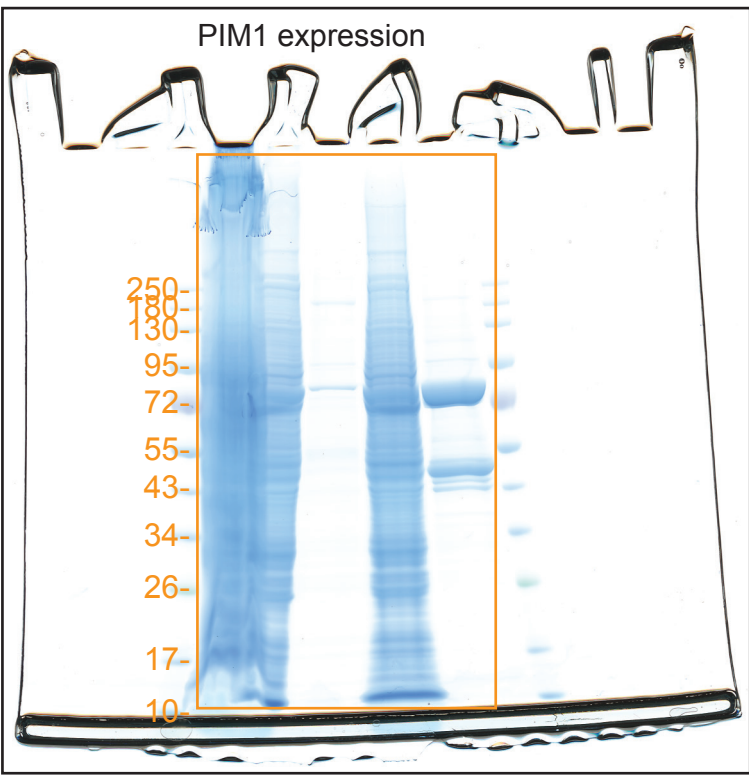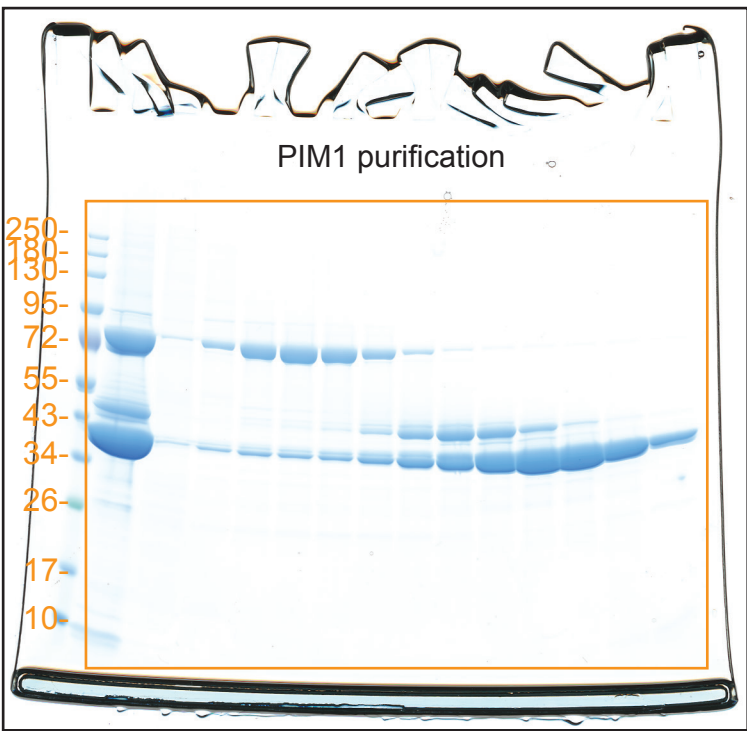

**Fig. S13A**

Figure as in manuscript:

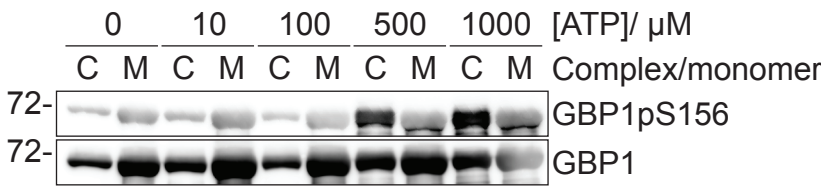

Uncropped gels with indicated size marker and crop area (lane annotation, if excluded from figure):

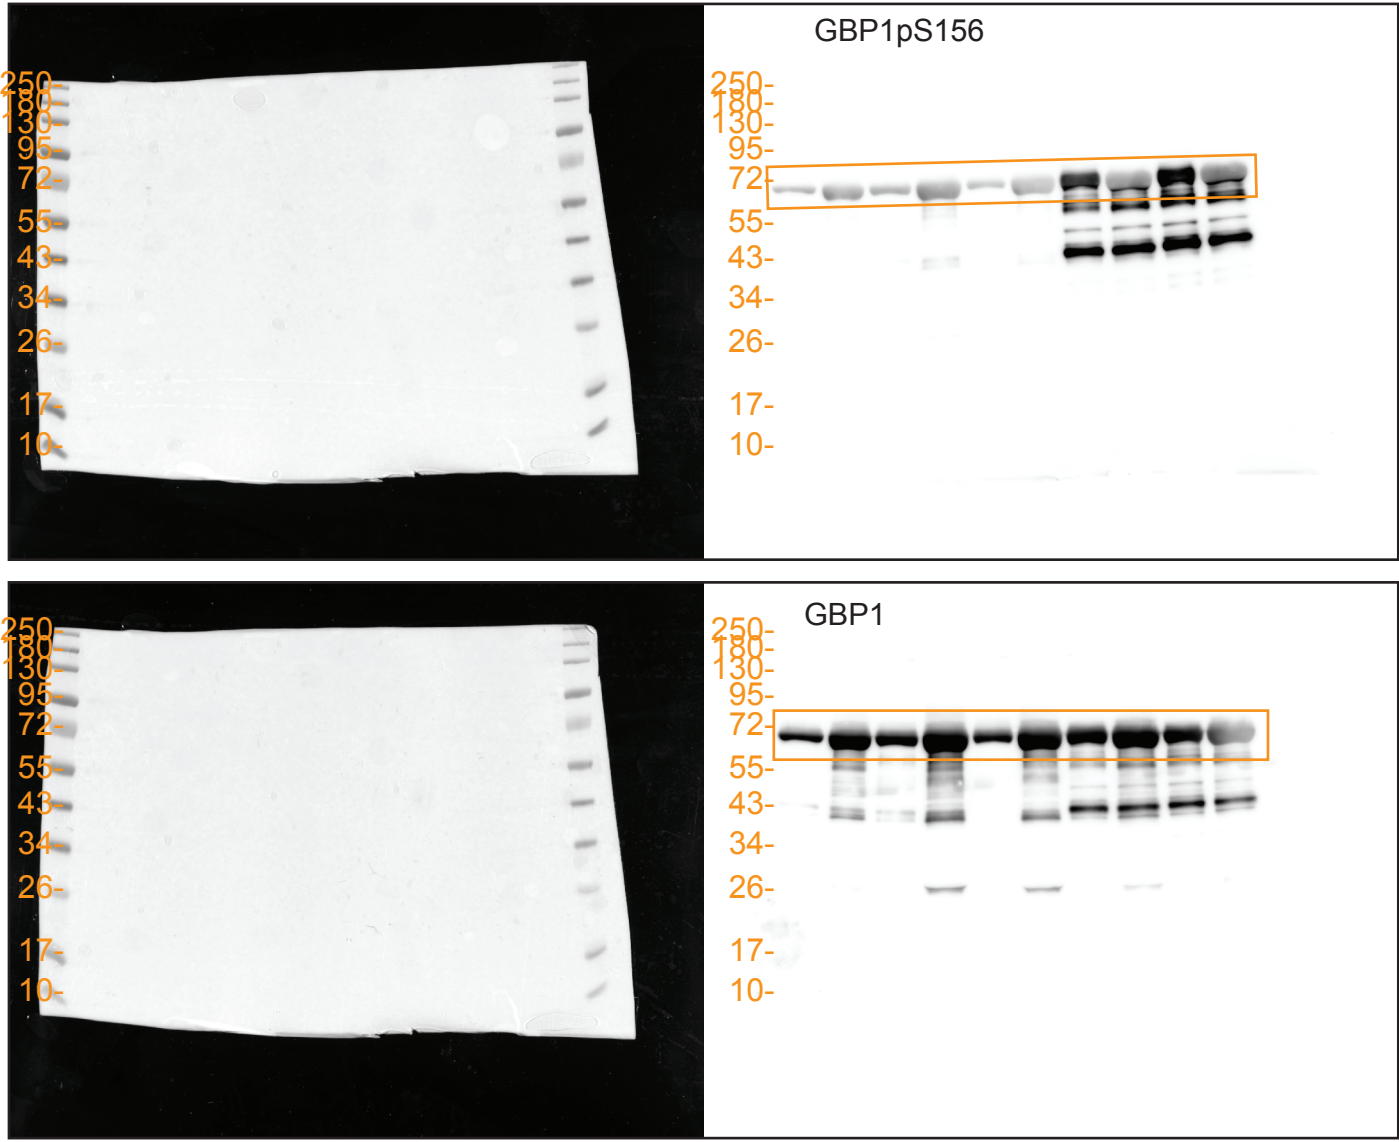

**Fig. S13B**

Figure as in manuscript:

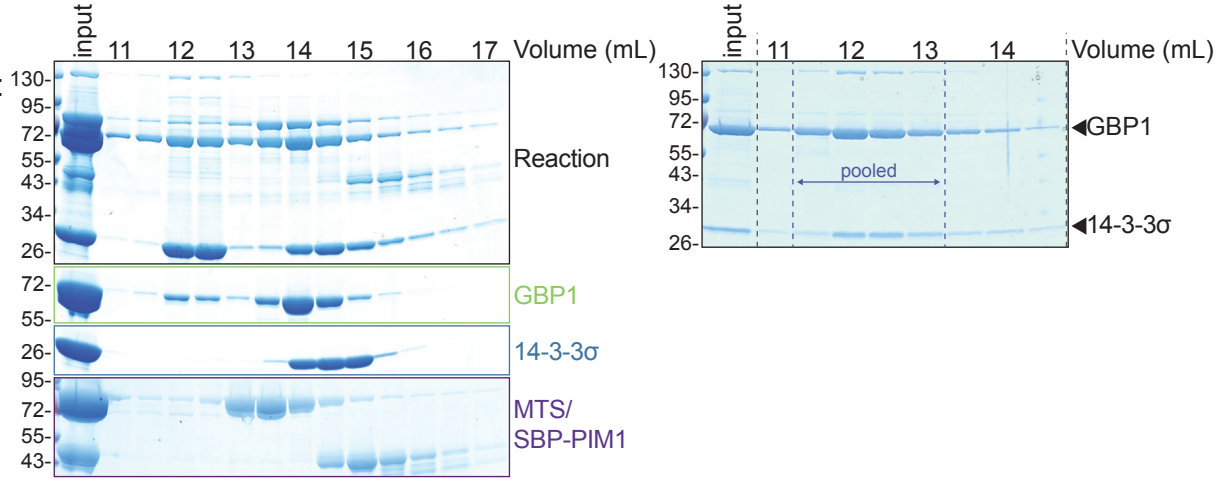

Uncropped gels with indicated size marker and crop area (lane annotation, if excluded from figure):

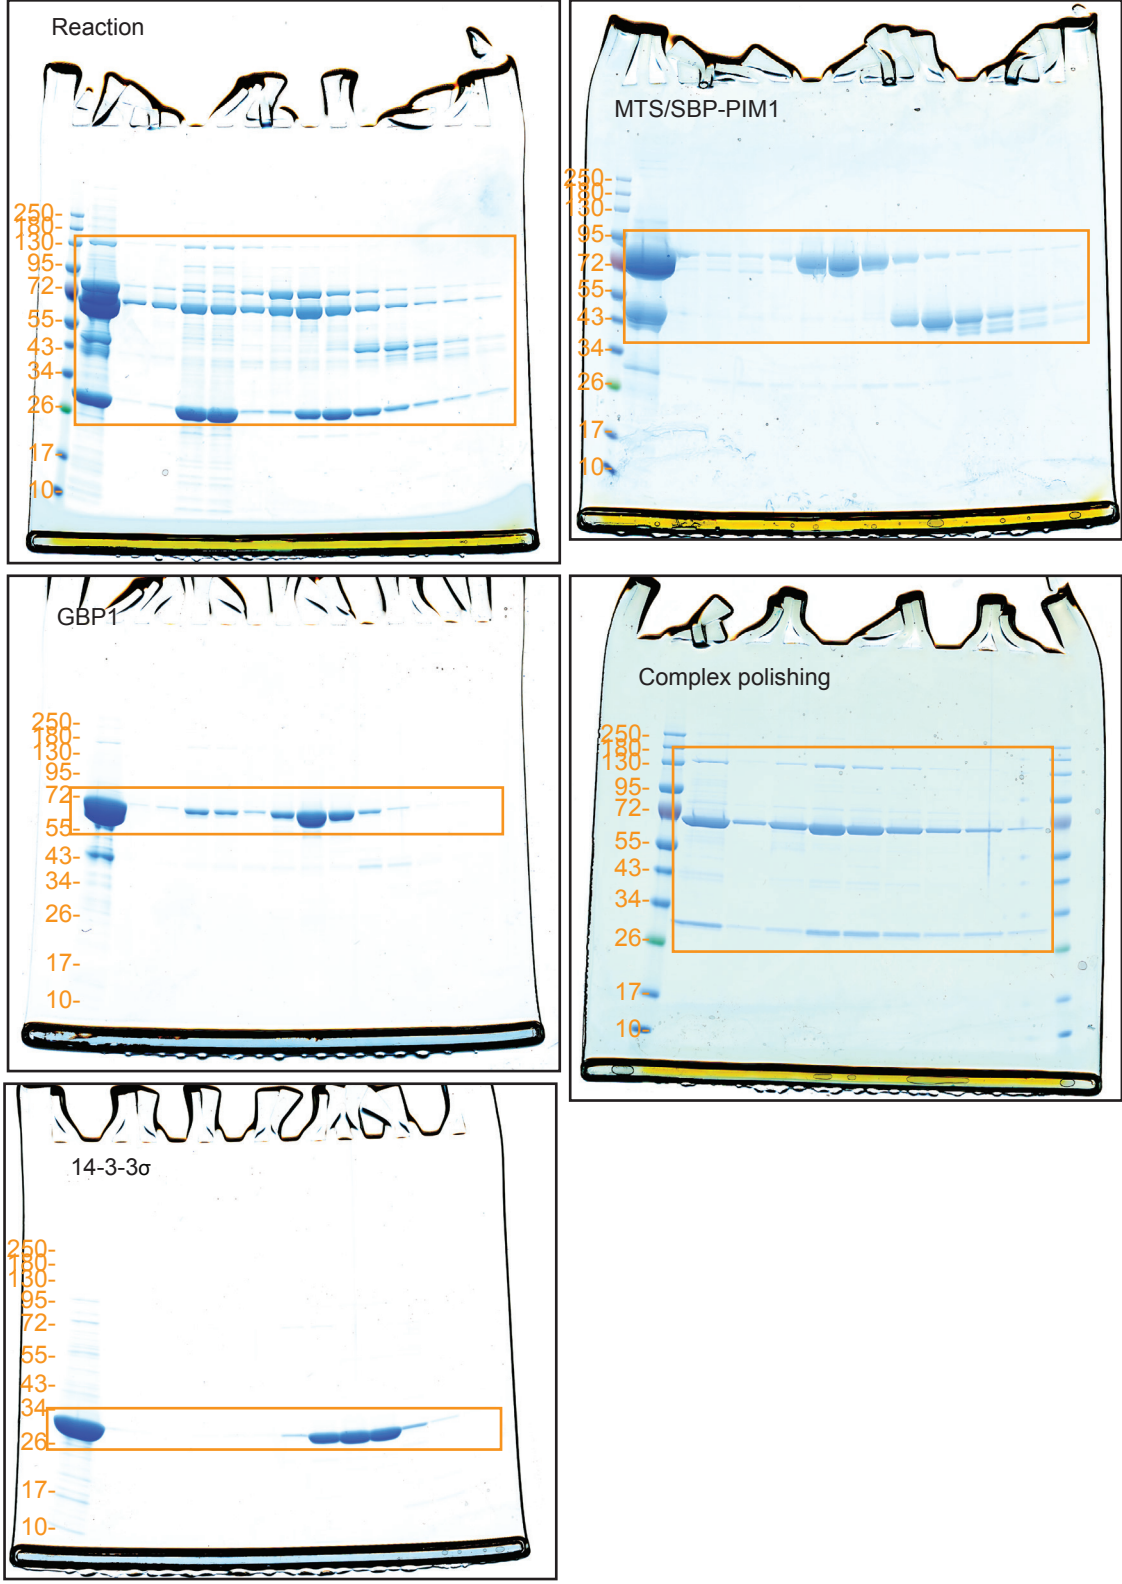



**Fig. S13C**

Figure as in manuscript:

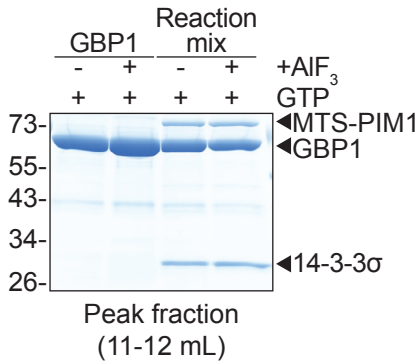

Uncropped gels with indicated size marker and crop area (lane annotation, if excluded from figure):

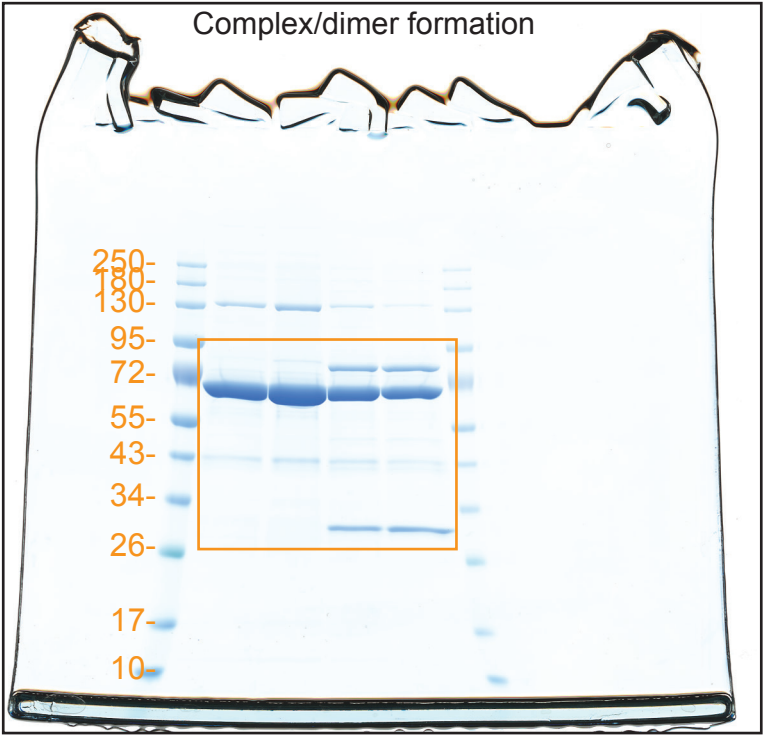

**Fig. S16D**

Figure as in manuscript:

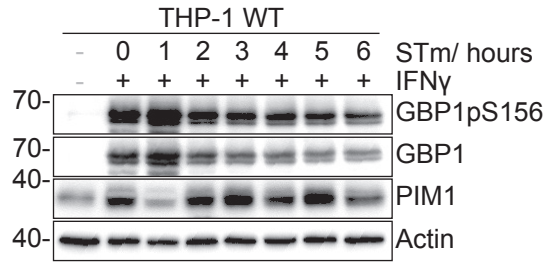

Uncropped gels with indicated size marker and crop area (lane annotation, if excluded from figure):

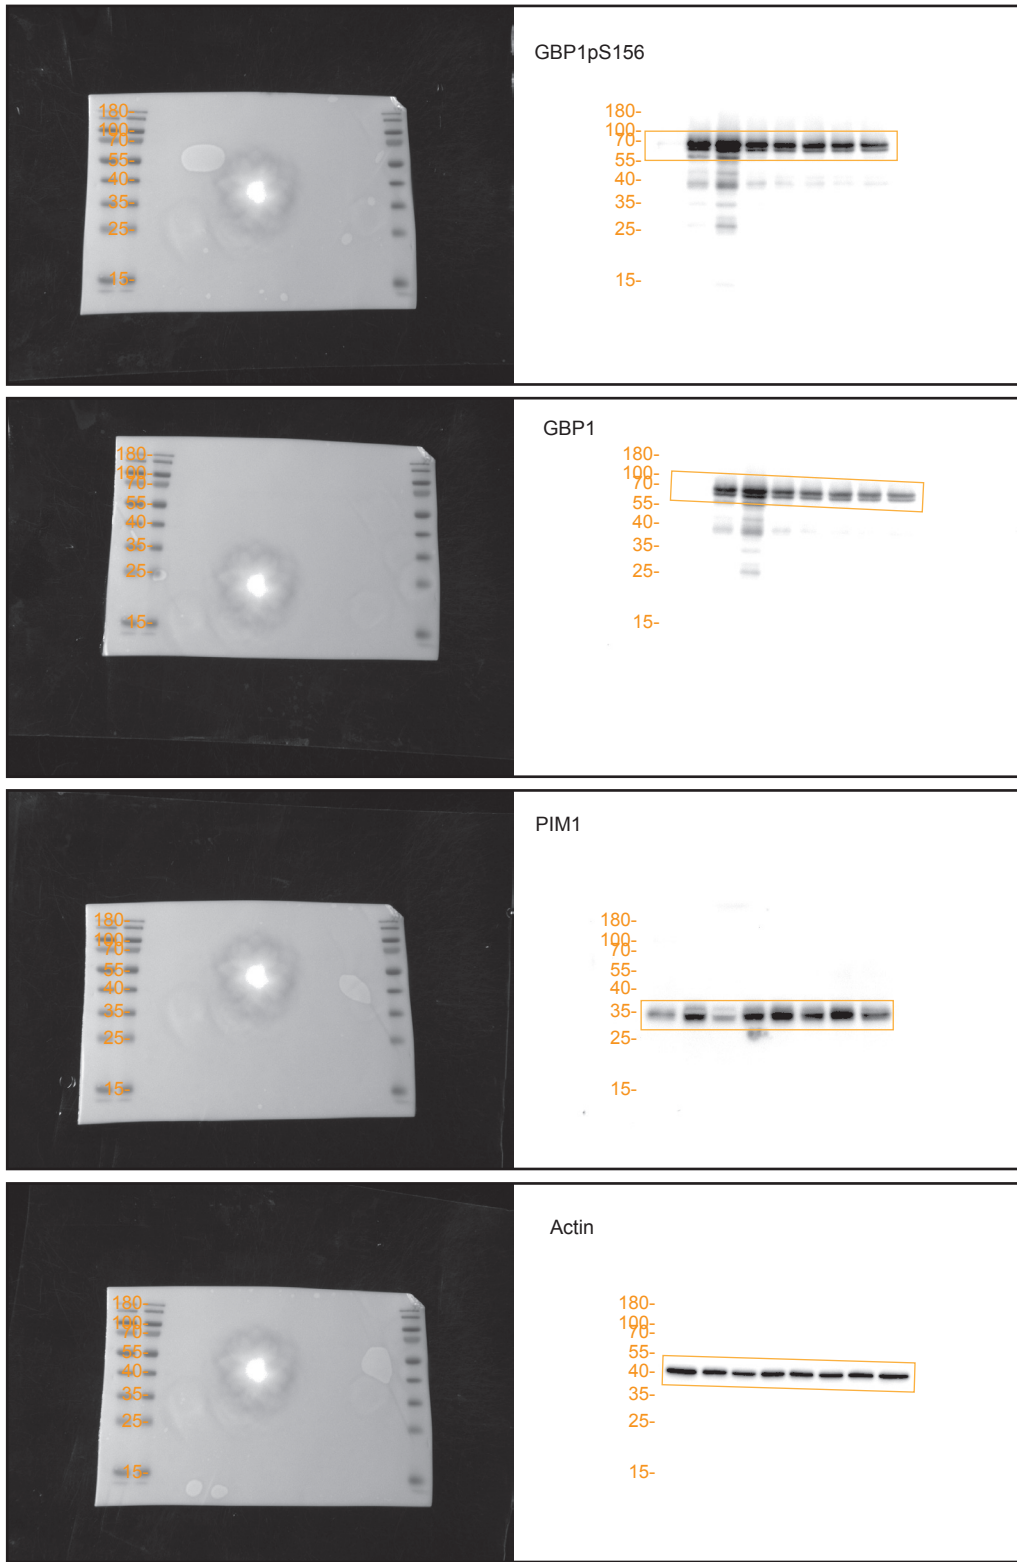

Supplement: EMS189180-supplement-Data_S5.pdf [file EMS189180-supplement-Data_S5.pdf]
